# Supplementary material
Source: Research Square preprint supplement (doi:10.21203/rs.3.rs-9470172/v1)
Supplement: Supplementary file [file 8e8e006d46bb0021a54ffdc8.pdf]

# LipoTag: A minimal motif for live and functional imaging of plant cell membranes.

Supplementary information

## Table of contents

|                                                                                                                            |              |
|----------------------------------------------------------------------------------------------------------------------------|--------------|
| <b>Synthetic procedures LipoTag precursors, fluorophore precursors and LipoTag modified fluorophores</b>                   | <b>2-8</b>   |
| <b>Figure S1, staining of Arabidopsis with commonly used mammalian membrane probes and LipoTag dye precursors</b>          | <b>9</b>     |
| <b>Figure S2, concentration range FM4-64 in different Arabidopsis root zones</b>                                           | <b>10</b>    |
| <b>Figure S3, penetration depth of FM4-64 in different tissues over time</b>                                               | <b>11</b>    |
| <b>Figure S4, effect of staining concentration of non-functional LipoTag probes on tissue penetration after 30 minutes</b> | <b>12</b>    |
| <b>Figure S5, staining kinetics of LipoTag-Green in the root tip and elongation zone</b>                                   | <b>13</b>    |
| <b>Figure S6, staining kinetics of LipoTag-Orange in the root tip and elongation zone</b>                                  | <b>14</b>    |
| <b>Figure S7, staining kinetics of LipoTag-Red in the root tip and elongation zone</b>                                     | <b>15</b>    |
| <b>Figure S8, chemical structures of non-functional LipoTag probes</b>                                                     | <b>16</b>    |
| <b>Figure S9, plasmolysis of LipoTag stained Arabidopsis roots</b>                                                         | <b>17</b>    |
| <b>Figure S10, staining of Arabidopsis roots with LipoTag-Cy5 and LipoTag-Oxa.</b>                                         | <b>18</b>    |
| <b>Figure S11, staining of <i>F. serratus</i> with LipoTag probes</b>                                                      | <b>19</b>    |
| <b>Figure S12, staining of <i>Ectocarpus</i> with LipoTag probes</b>                                                       | <b>20</b>    |
| <b>Figure S13, staining of <i>S. rigidula</i> with LipoTag probes</b>                                                      | <b>21</b>    |
| <b>Figure S14, staining of <i>S. latissima</i> with LipoTag probes</b>                                                     | <b>22</b>    |
| <b>Figure S15, staining of Murine macrophage cells with LipoTag dyes</b>                                                   | <b>23</b>    |
| <b>Figure S16, staining of plasmodesmata in <i>Marchantia gemmae</i></b>                                                   | <b>24</b>    |
| <b>Figure S17, calibration of LipoTag-BDP</b>                                                                              | <b>25</b>    |
| <b>Figure S18, staining of Arabidopsis root with NR12S</b>                                                                 | <b>26</b>    |
| <b>Figure S19, mock hemin treatment with LipoTag-Ox</b>                                                                    | <b>27</b>    |
| <b>Figure S20, chemical structures of functional LipoTag probes</b>                                                        | <b>28</b>    |
| <b>Figure S21, normalized fluorescence spectra of all LipoTag probes</b>                                                   | <b>29</b>    |
| <b>Table S1, number of samples</b>                                                                                         | <b>30-31</b> |
| <b>Figure S22-45, NMR-spectra</b>                                                                                          | <b>32-55</b> |

## LipoTag fluorophore conjugation, LipoTag and LipoTag precursors synthesis

### LipoTag fluorophore general conjugation protocol.

10 mg of alkyne modified fluorophore was dissolved in 4.5 ml DMF.  $\text{CuSO}_4$  and THPTA were added from a 10mM and 5 mM stock solution in water so their final concentration is 200 and 500  $\mu\text{M}$  respectively. 2 equivalents of LipoTag were added (compared to fluorophore) from a 100 mM stock solution in water. The resulting solution was stirred and bubbled with  $\text{N}_2$  before the addition of sodium ascorbate from a 10 mM stock solution in water so its final concentration is 400  $\mu\text{M}$ . The resulting mixture is left stirring overnight before being concentrated under air flow. The resulting product was run over a basic alumina plug, first washing with 10:90 MeOH/DCM followed by elution with 100% MeOH.

### 1-azido-6-chlorohexane (1)

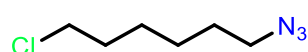

1-bromo-6-chlorohexane (6.9 ml, 46.2 mmol) was dissolved in 50 ml DMF.  $\text{NaN}_3$  (3g, 46.2 mmol) was added and the mixture left to stir overnight at room temperature. The mixture was diluted with 60 ml of  $\text{H}_2\text{O}$  and the product extracted with 3x 75  $\text{Et}_2\text{O}$ . The combined organic layers were washed with 3x100 ml  $\text{H}_2\text{O}$ . The organic layer was dried with  $\text{MgSO}_4$  and concentrated under reduced pressure, yielding 6.99 g of **1** as an oil. Yield: 94%.  **$^1\text{H NMR}$**  (400 MHz,  $\text{CDCl}_3$ )  $\delta$  3.53 (t,  $J$  = 6.6 Hz, 2H), 3.27 (t,  $J$  = 6.9 Hz, 2H), 1.83 – 1.73 (m, 2H), 1.65 – 1.56 (m, 2H), 1.51 – 1.35 (m, 4H).  **$^{13}\text{C NMR}$**  (101 MHz,  $\text{CDCl}_3$ )  $\delta$  51.33, 44.90, 32.41, 28.73, 26.43, 26.04.

### 1-azido-6-iodohexane (2)

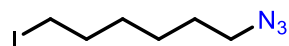

**1** (6.9 g, 42.7 mmol) and  $\text{NaI}$  (12.77 g, 85.2 mmol) were added to 200 ml acetone. The mixture was bubbled with  $\text{N}_2$  for 10 minutes and then left stirring for 24h under reflux. After cooling the mixture was diluted with 100 ml  $\text{H}_2\text{O}$  and extracted with 3x 100 ml  $\text{EtOAc}$ . The combined organic layers were dried with  $\text{MgSO}_4$  and concentrated under vacuum, yielding 5.88g of **2**. Yield: 54%.  **$^1\text{H NMR}$**  (400 MHz,  $\text{CDCl}_3$ )  $\delta$  3.26 (t,  $J$  = 6.9 Hz, 2H), 3.18 (t,  $J$  = 6.9 Hz, 2H), 1.88 – 1.72 (m, 2H), 1.66 – 1.53 (m, 2H), 1.51 – 1.32 (m, 4H).  **$^{13}\text{C NMR}$**  (101 MHz,  $\text{CDCl}_3$ )  $\delta$  51.31, 33.24, 30.00, 28.67, 25.67, 6.77.

### 6-azido-N-(3-(dimethylamino)propyl)-N,N-dimethylhexan-1-aminium (3)

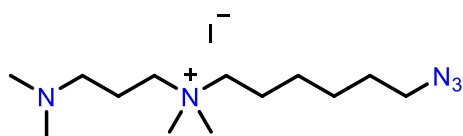

**2** (800 mg, 3.2 mmol) and N,N,N',N'-tetramethyl-1,3-propanediamine (15 ml, 90 mmol) were dissolved in 40 ml of dry THF and left stirring overnight at room temperature. The mixture was concentrated under vacuum at 50 °C and washed three times with Et<sub>2</sub>O and dried under vacuum yielding 1.12 g of **4**. Yield: 91%. <sup>1</sup>H NMR (400 MHz, MeOD) δ 3.43 – 3.32 (m, 6H), 3.11 (s, 6H), 2.41 (t, J = 7.1 Hz, 2H), 2.28 (s, 6H), 1.99 – 1.88 (m, 2H), 1.85 – 1.74 (m, 2H), 1.69 – 1.58 (m, 2H), 1.57 – 1.38 (m, 4H). <sup>13</sup>C NMR (101 MHz, D<sub>2</sub>O) δ 64.70, 64.14, 62.09, 54.76, 50.99, 50.81, 43.72, 27.74, 27.70, 25.50, 25.45, 25.03, 21.91, 21.80, 19.77.

### LipoTag (4)

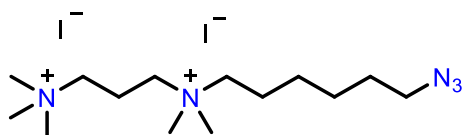

**3** (400 mg, 1.04 mmol) was added to 5 ml of DMF followed by 2 ml of MeI (31 mmol). The mixture was left stirring overnight at room temperature and then concentrated under vacuum at 50 °C and washed with Et<sub>2</sub>O yielding 508 mg of **4** as a viscous, brown oil. Yield: 93%. <sup>1</sup>H NMR (400 MHz, D<sub>2</sub>O) δ 3.52 – 3.34 (m, 9H), 3.24 (s, 9H), 3.18 (s, 6H), 2.37 (s, 2H), 1.84 (s, 2H), 1.66 (s, 2H), 1.47 (s, 4H). <sup>13</sup>C NMR (101 MHz, D<sub>2</sub>O) δ 64.89, 62.48, 60.06, 53.36, 51.00, 34.57, 27.74, 25.49, 25.02, 21.90, 17.19.

#### 4-(prop-2-yn-1-yloxy)benzaldehyde (**5**)

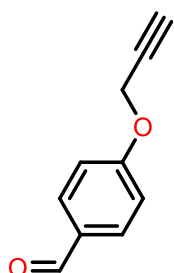

4-hydroxy-benzaldehyde (**3g**, 24.6 mmol) was dissolved in 250 ml of acetone.  $K_2CO_3$  (13.58g, 98.3 mmol) and propargyl bromide (10.5 ml from a 80% solution with toluene, 98.3 mmol) were added and the mixture was bubbled with  $N_2$  for 5 minutes. The mixture was heated to reflux for 4 hours, cooled to room temperature and diluted with 250 ml  $H_2O$  (all residual  $K_2SO_3$  needs to be dissolved). The aqueous solution was extracted with 3x 200 ml DCM, the combined organic layers were dried with  $MgSO_4$  and concentrated under vacuum, yielding 3.6g of **5** as a brown solid. Yield: 91%.  $^1H$  NMR (400 MHz,  $CDCl_3$ )  $\delta$  9.91 (s, 1H), 7.86 (d,  $J$  = 8.8 Hz, 2H), 7.09 (d,  $J$  = 8.8 Hz, 2H), 4.78 (d,  $J$  = 2.4 Hz, 2H), 2.57 (t,  $J$  = 2.4 Hz, 1H).  $^{13}C$  NMR (101 MHz,  $CDCl_3$ )  $\delta$  190.77, 162.38, 131.90, 130.62, 115.19, 77.55, 76.37, 55.96.

#### BDP-green alkyne (**6**)

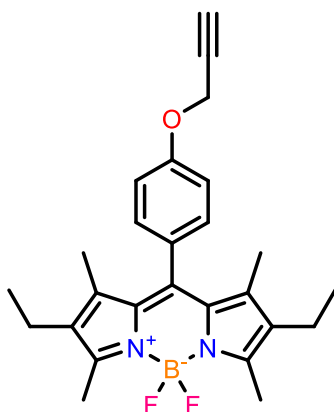

**5** (500 mg, 3.12 mmol) and 2,4-dimethyl-3-ethyl-pyrrole (769 mg, 6.24 mmol) dissolved in 125 ml of dry DCM. The mixture was bubbled with  $N_2$  for 30 minutes after which TFA (125  $\mu$ l, 1.5 mmol) was added and the mixture was left to stir for 2 hours. 2,3-Dichloro-5,6-dicyano-1,4-benzoquinone (DDQ, 708 mg, 3.12 mmol) was added and the mixture left to stir for 30 minutes. DIPEA (3.75 ml, excess) and  $BF_3 \cdot OEt_2$  (3.8 ml, excess) were added subsequently and the mixture was left stirring overnight at room temperature. After purification on silica (2:3 EtOAc:PE) the 437 mg of **6** was isolated as a red, crystalline solid. Yield: 32%.  $^1H$  NMR (400 MHz,  $CDCl_3$ )  $\delta$  7.19 (d,  $J$  = 8.6 Hz, 2H), 7.08 (d,  $J$  = 8.7 Hz, 2H), 4.77 (d,  $J$  = 2.4 Hz, 2H), 2.56 (t,  $J$  = 2.4 Hz, 1H), 2.53 (d,  $J$  = 1.3 Hz, 6H), 2.30 (q,  $J$  = 7.5 Hz, 4H), 1.33 (s, 6H), 0.98 (t,  $J$  = 7.5 Hz, 6H).  $^{13}C$  NMR (101 MHz,  $CDCl_3$ )  $\delta$  158.11, 153.76, 140.07, 138.54, 132.85, 131.25, 129.65, 129.01, 115.69, 78.26, 75.98, 56.19, 17.21, 14.76, 12.63, 11.96.

### BDP-rotor alkyne (7)

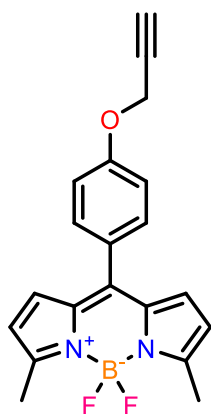

**5** (500 mg, 3.12 mmol) and 2-methyl-1H-pyrrole (506 mg, 6.24 mmol) dissolved in 125 ml of dry DCM. The mixture was bubbled with N<sub>2</sub> for 30 minutes after which TFA (125  $\mu$ l, 1.5 mmol) was added and the mixture was left to stir for 2 hours. 2,3-Dichloro-5,6-dicyano-1,4-benzoquinone (DDQ, 708 mg, 3.12 mmol) was added and the mixture left to stir for 30 minutes. DIPEA (3.75 ml, excess) and BF<sub>3</sub>-OEt<sub>2</sub> (3.8 ml, excess) were added subsequently and the mixture was left stirring overnight at room temperature. After purification on silica (2:3 EtOAc:PE) the 86 mg of **7** was isolated as a red, crystalline solid. Yield: 8%. **<sup>1</sup>H NMR** (400 MHz, CDCl<sub>3</sub>)  $\delta$  7.47 (d, J = 8.7 Hz, 2H), 7.08 (d, J = 8.7 Hz, 2H), 6.74 (d, J = 4.1 Hz, 2H), 6.27 (d, J = 4.2 Hz, 2H), 4.78 (d, J = 2.4 Hz, 2H), 2.65 (s, 6H), 2.58 (t, J = 2.4 Hz, 1H). **<sup>13</sup>C NMR** (101 MHz, CDCl<sub>3</sub>)  $\delta$  159.14, 157.20, 142.30, 134.51, 131.96, 130.27, 127.43, 119.26, 114.62, 78.06, 76.08, 55.92, 14.88.

### 5-(diethylamino)-2-nitrosophenol (8)

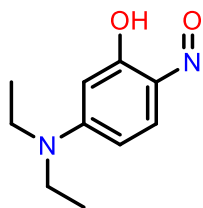

3-diethylaminophenol (8.7 g, 52.7 mmol) was dissolved in 30 ml concentrated HCl + 10 ml H<sub>2</sub>O. The solution was cooled to 0 °C after which NaNO<sub>2</sub> (4.36 g, 63 mmol) dissolved in 30 ml H<sub>2</sub>O was added dropwise. The mixture was left stirring for 1h, filtered and the residue washed with a saturated sodium acetate solution. The residue was recrystallized from acetone, yielding 1.07g of **8**. Yield: 16%. **<sup>1</sup>H NMR** (400 MHz, DMSO)  $\delta$  7.31 (d, J = 9.9 Hz, 1H), 6.88 (dd, J = 10.0, 2.6 Hz, 1H), 5.74 (d, J = 2.6 Hz, 1H), 3.59 (q, J = 7.1 Hz, 4H), 1.18 (t, J = 7.1 Hz, 6H). **<sup>13</sup>C NMR** (101 MHz, DMSO)  $\delta$  169.20, 157.56, 149.71, 134.96, 115.72, 95.60, 46.07, 13.64

## NR-alkyne (9)

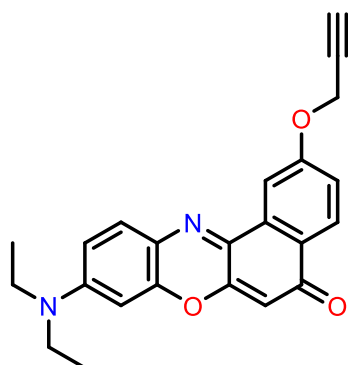

**8** (292 mg, 1.27 mmol) and 1,6-dihydroxynaphthalene (204 mg, 1.27 mmol) were dissolved in 10 ml DMF and refluxed at 155 °C for 4 hour. The mixture was cooled to 110 °C after which K<sub>2</sub>CO<sub>3</sub> (675 mg, 5.08 mmol) was added followed by propargyl bromide (0.55 ml from a 80% solution in toluene, 5.08 mmol) and left stirring for 1 hour at 110 °C. The mixture was cooled to room temperature and diluted with Et<sub>2</sub>O (25 ml) and brine (25 ml). The aqueous layer was washed with 3x25 ml Et<sub>2</sub>O and the organic layers were combined, concentrated and purified on silica (2:1 hexane:EtOAc, 5% TEA) yielding 60 mg of **9**. Yield: 13%. **<sup>1</sup>H NMR** (400 MHz, CDCl<sub>3</sub>) δ 8.25 (d, J = 8.8 Hz, 1H), 8.14 (d, J = 2.6 Hz, 1H), 7.56 (d, J = 9.1 Hz, 1H), 7.23 (d, J = 2.6 Hz, 1H), 6.66 (dd, J = 9.0, 2.7 Hz, 1H), 6.47 (d, J = 2.7 Hz, 1H), 6.33 (s, 1H), 4.90 (d, J = 2.4 Hz, 2H), 3.47 (qd, J = 7.1, 4.3 Hz, 10H), 2.58 (t, J = 2.4 Hz, 1H), 1.26 (td, J = 7.1, 5.7 Hz, 18H).

## 1-(prop-2-yn-1-yl)-1,2,3,4-tetrahydroquinolin-7-ol (10)

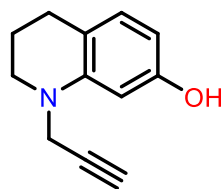

7-hydroxy-1,2,3,4-tetrahydroquinoline (1g, 6.67 mmol) and K<sub>2</sub>CO<sub>3</sub> (1.1 g, 8 mmol) were dissolved in 8.5 ml of dry DMF. Propargyl bromide (1.5 ml from a 80% solution in toluene, 10 mmol) was added and the mixture left to stir for 1.5 hours at 65 °C. The mixture was cooled to room temperature, EtOAc (100 ml) and H<sub>2</sub>O (20 ml) were added. The aqueous layer was washed with 3x20 ml EtOAc. The organic layers were combined, concentrated and purified on silica (1:4 EtOAc:hexane) yielding 761 mg of **10**. Yield: 61%. **<sup>1</sup>H NMR** (400 MHz, CDCl<sub>3</sub>) δ 6.82 (d, J = 8.0 Hz, 1H), 6.24 (d, J = 2.4 Hz, 1H), 6.15 (dd, J = 8.0, 2.4 Hz, 1H), 4.55 (s, 1H), 3.97 (d, J = 2.4 Hz, 2H), 3.34 – 3.18 (m, 2H), 2.69 (t, J = 6.5 Hz, 2H), 2.16 (t, J = 2.4 Hz, 1H), 2.02 – 1.93 (m, 2H). **<sup>13</sup>C NMR** (101 MHz, CDCl<sub>3</sub>) δ 154.73, 145.58, 129.78, 116.47, 104.12, 99.30, 79.48, 71.75, 49.12, 40.76, 26.91, 22.54.

### 1-ethyl-7-methoxy-2,2,4-trimethyl-1,2-dihydroquinoline (11)

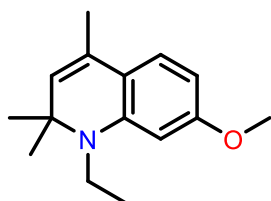

7-methoxy-2,2,4-trimethyl-1,2-dihydroquinoline (2 g, 9.8 mmol) and  $K_2CO_3$  (2.12 g, 15.4 mmol) were added to 35 ml MeCN. Iodoethane (2 ml, 24.8 mmol) was added and the mixture was left stirring overnight at 90 °C. The mixture was filtered, concentrated and purified on silica (1:19 EtOAc:cyclohexane) yielding 850 mg of **11**. Yield: 37%.  $^1H$  NMR (400 MHz,  $CDCl_3$ )  $\delta$  6.96 (d,  $J$  = 8.3 Hz, 1H), 6.14 (dd,  $J$  = 8.3, 2.4 Hz, 1H), 6.08 (d,  $J$  = 2.4 Hz, 1H), 5.10 (q,  $J$  = 1.4 Hz, 1H), 3.79 (s, 3H), 3.30 (d,  $J$  = 7.1 Hz, 2H), 1.94 (d,  $J$  = 1.4 Hz, 3H), 1.30 (s, 6H), 1.20 (t,  $J$  = 7.0 Hz, 3H).  $^{13}C$  NMR (101 MHz,  $CDCl_3$ )  $\delta$  160.53, 144.98, 127.35, 126.99, 124.44, 116.60, 98.76, 97.51, 56.89, 55.09, 38.19, 18.76, 14.25.

### (E)-1-ethyl-7-methoxy-2,2,4-trimethyl-6-((4-nitrophenyl)diazenyl)-1,2-dihydroquinoline (12)

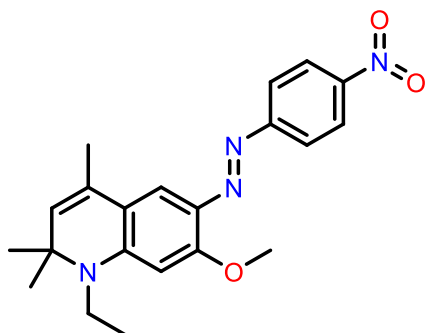

**11** (200 mg, 0.86 mmol) was dissolved in 8 ml MeOH. A suspension of 4-nitrobenzenediazonium tetrafluoroborate (215 mg, 0.91 mmol) in 1 ml of a 10 %  $H_2SO_4$  in  $H_2O$  was added dropwise, the resulting solution was stirred for 1 hour and then cooled on ice before adding 0.16 ml of a 30%  $NH_4OH$  solution. The precipitate was isolated, washed with 300 ml of  $H_2O$ , and then purified on silica (1:4 EtOAc:cyclohexane) yielding 286 mg of **12**. Yield: 87%.  $^1H$  NMR (400 MHz,  $CDCl_3$ )  $\delta$  8.29 (d,  $J$  = 9.0 Hz, 2H), 7.87 (d,  $J$  = 9.0 Hz, 2H), 7.66 (s, 1H), 6.07 (s, 1H), 5.27 (d,  $J$  = 1.5 Hz, 1H), 4.04 (s, 3H), 3.51 (q,  $J$  = 7.1 Hz, 2H), 2.02 (d,  $J$  = 1.4 Hz, 3H), 1.41 (s, 6H), 1.33 (t,  $J$  = 7.0 Hz, 3H).  $^{13}C$  NMR (101 MHz,  $CDCl_3$ )  $\delta$  161.20, 157.97, 150.28, 146.76, 133.44, 128.54, 127.04, 124.83, 122.51, 116.48, 112.50, 93.24, 77.48, 77.16, 76.84, 58.78, 56.46, 39.18, 29.56, 27.07, 18.92, 13.98, 0.14.

### Oxazine alkyne (**13**)

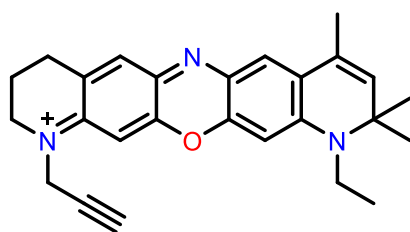

**10** (24.5 mg, 0.13 mmol) and **12** (50 mg, 0.13 mmol) were dissolved in an aqueous 1.5% HCl solution. The solution was heated to 80 °C for 4 hours, cooled and concentrated followed by purification on silica (1:19 MeOH:CHCl<sub>3</sub>) yielding 42 mg of **13** which was not pure by NMR. <sup>1</sup>H NMR (400 MHz, CDCl<sub>3</sub>) δ 7.47 (s, 1H), 7.36 (s, 1H), 7.28 (s, 1H), 6.47 (s, 1H), 5.53 (d, J = 1.5 Hz, 1H), 4.27 – 4.18 (m, 1H), 3.82 (q, J = 5.7 Hz, 2H), 3.74 (s, 2H), 3.73 – 3.66 (m, 3H), 3.25 (d, J = 7.5 Hz, 3H), 2.88 (t, J = 6.3 Hz, 3H), 2.29 (s, 2H), 2.14 – 2.07 (m, 3H), 2.06 (s, 3H), 2.04 – 1.95 (m, 4H), 1.52 (s, 6H).

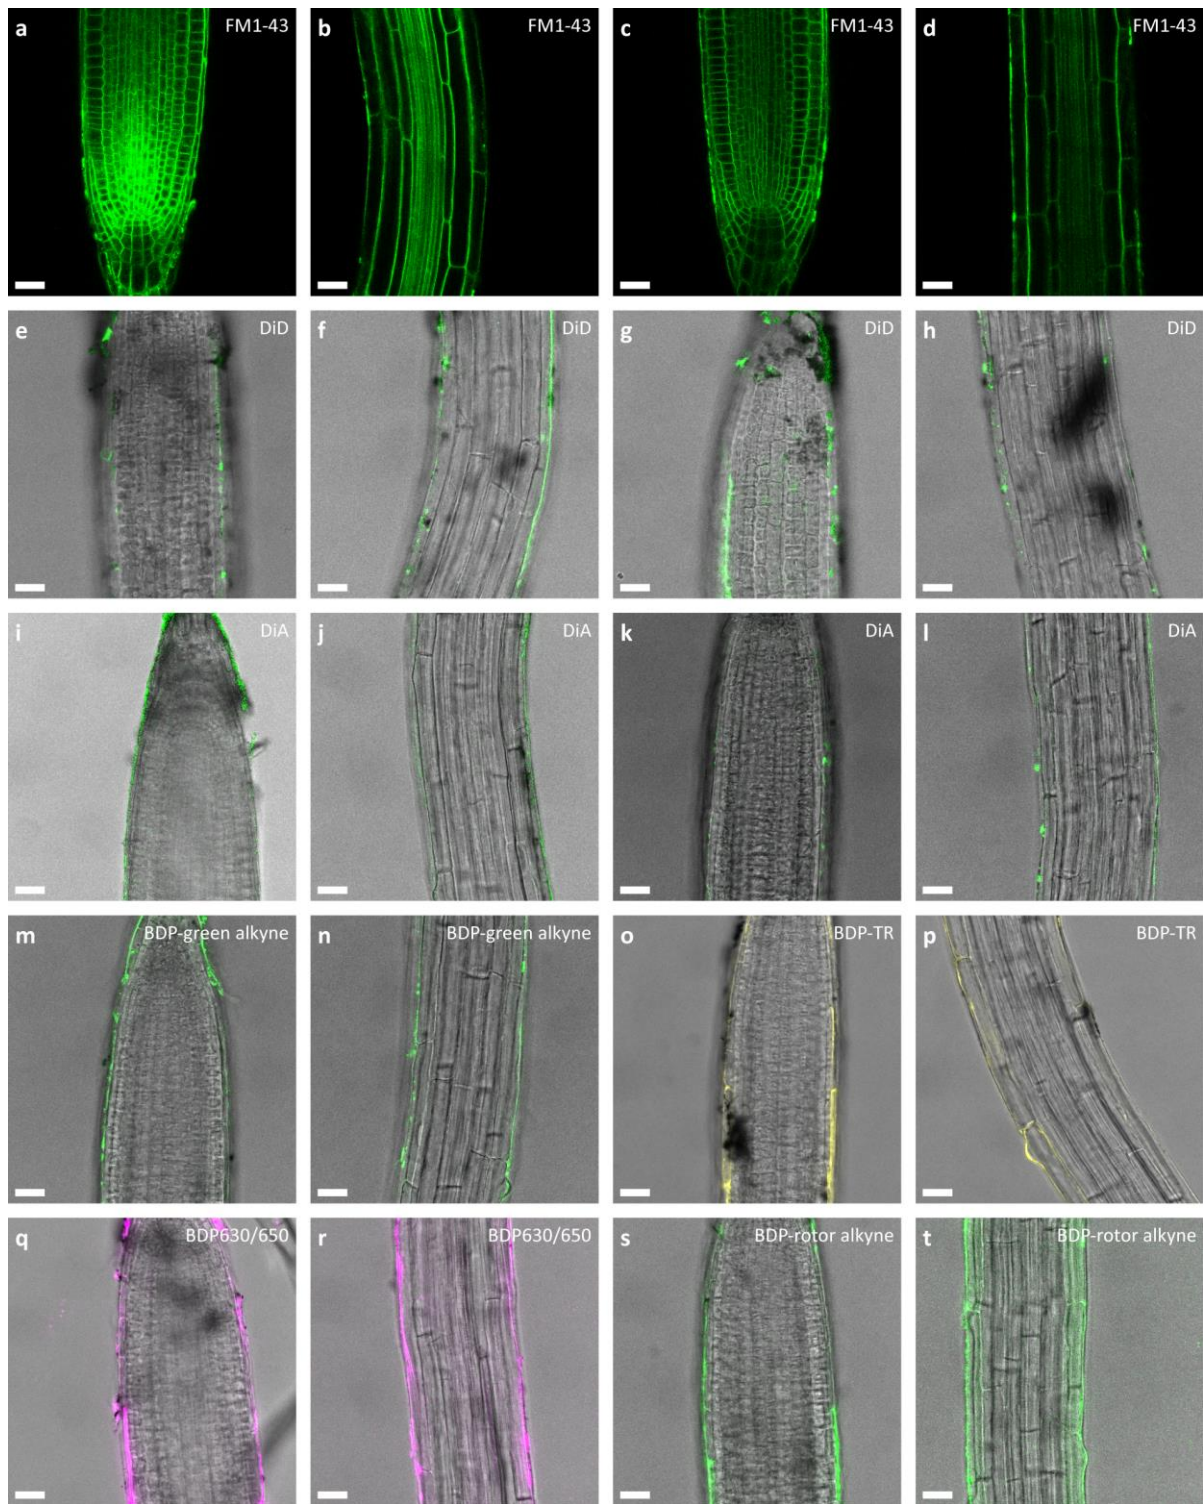

**Fig. S1.** Staining of Arabidopsis with commonly used mammalian membrane probes and LipoTag dye precursors. **a-d**, Staining of different regions of Arabidopsis roots with 10  $\mu\text{M}$  (**a,b**) and 1  $\mu\text{M}$  (**c,d**) FM1-43. **e-h**, Staining of different regions of Arabidopsis roots with 10  $\mu\text{M}$  (**e,f**) and 1  $\mu\text{M}$  (**g,h**) DiD. **i-l**, Staining of different regions of Arabidopsis roots with 10  $\mu\text{M}$  (**i,j**) and 1  $\mu\text{M}$  (**k,l**) DiA. **m-n**, Staining of Arabidopsis root with 1  $\mu\text{M}$  LipoTag-Green precursor BDP-alkyne green (6). **o-p**, Staining of Arabidopsis root with 1  $\mu\text{M}$  LipoTag-Orange precursor BDP-TR alkyne. **q-r**, Staining of Arabidopsis root with 1  $\mu\text{M}$  LipoTag-Red precursor BDP630/650 alkyne. **s-t**, Staining of Arabidopsis root with 1  $\mu\text{M}$  LipoTag-BDP precursor BDP-alkyne green (6). **m-n**, Staining of Arabidopsis root with 1  $\mu\text{M}$  LipoTag-Green precursor BDP-rotor alkyne (7). Scale bars represent 25  $\mu\text{m}$ .

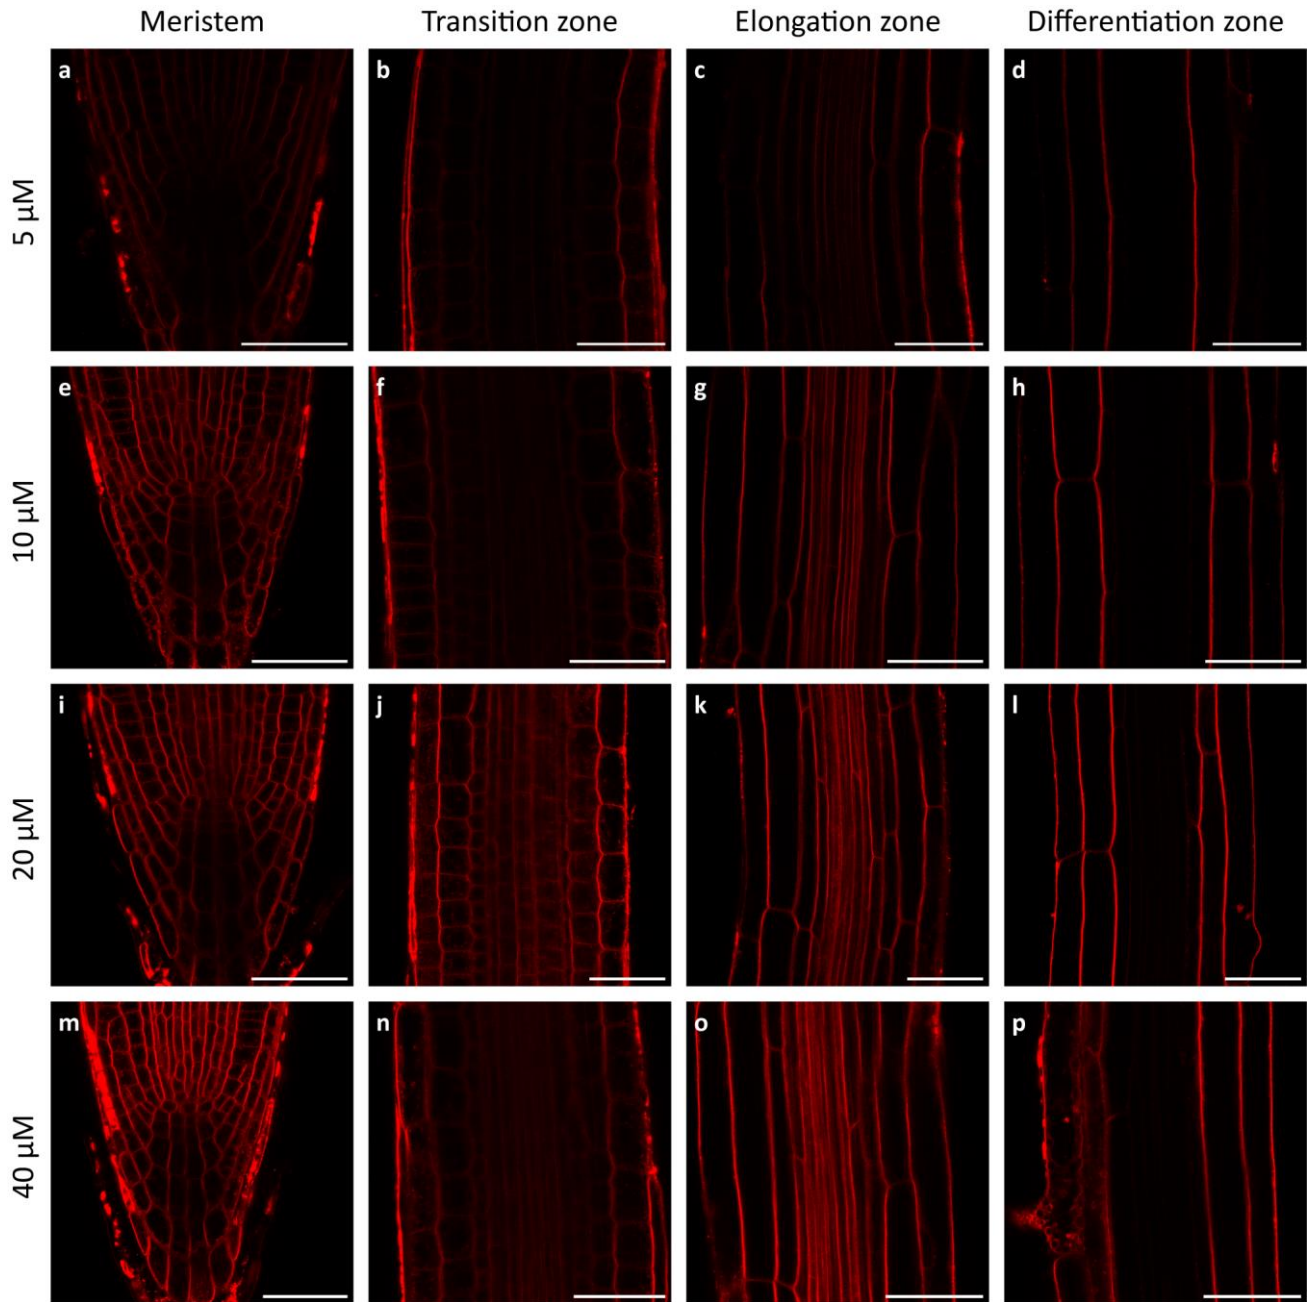

**Fig. S2.** Concentration range FM4-64 in different Arabidopsis root zones.

Concentration range with FM4-64 for different root tissues with 5 μM in 0.5x MS (**a-d**), 10 μM in 0.5x MS (**e-h**), 20 μM in 0.5x MS (**i-l**), and 40 μM in 0.5x MS (**m-p**) for 20 minutes. All measurements were performed and processed the same way. Scale bar represents 40 μm.

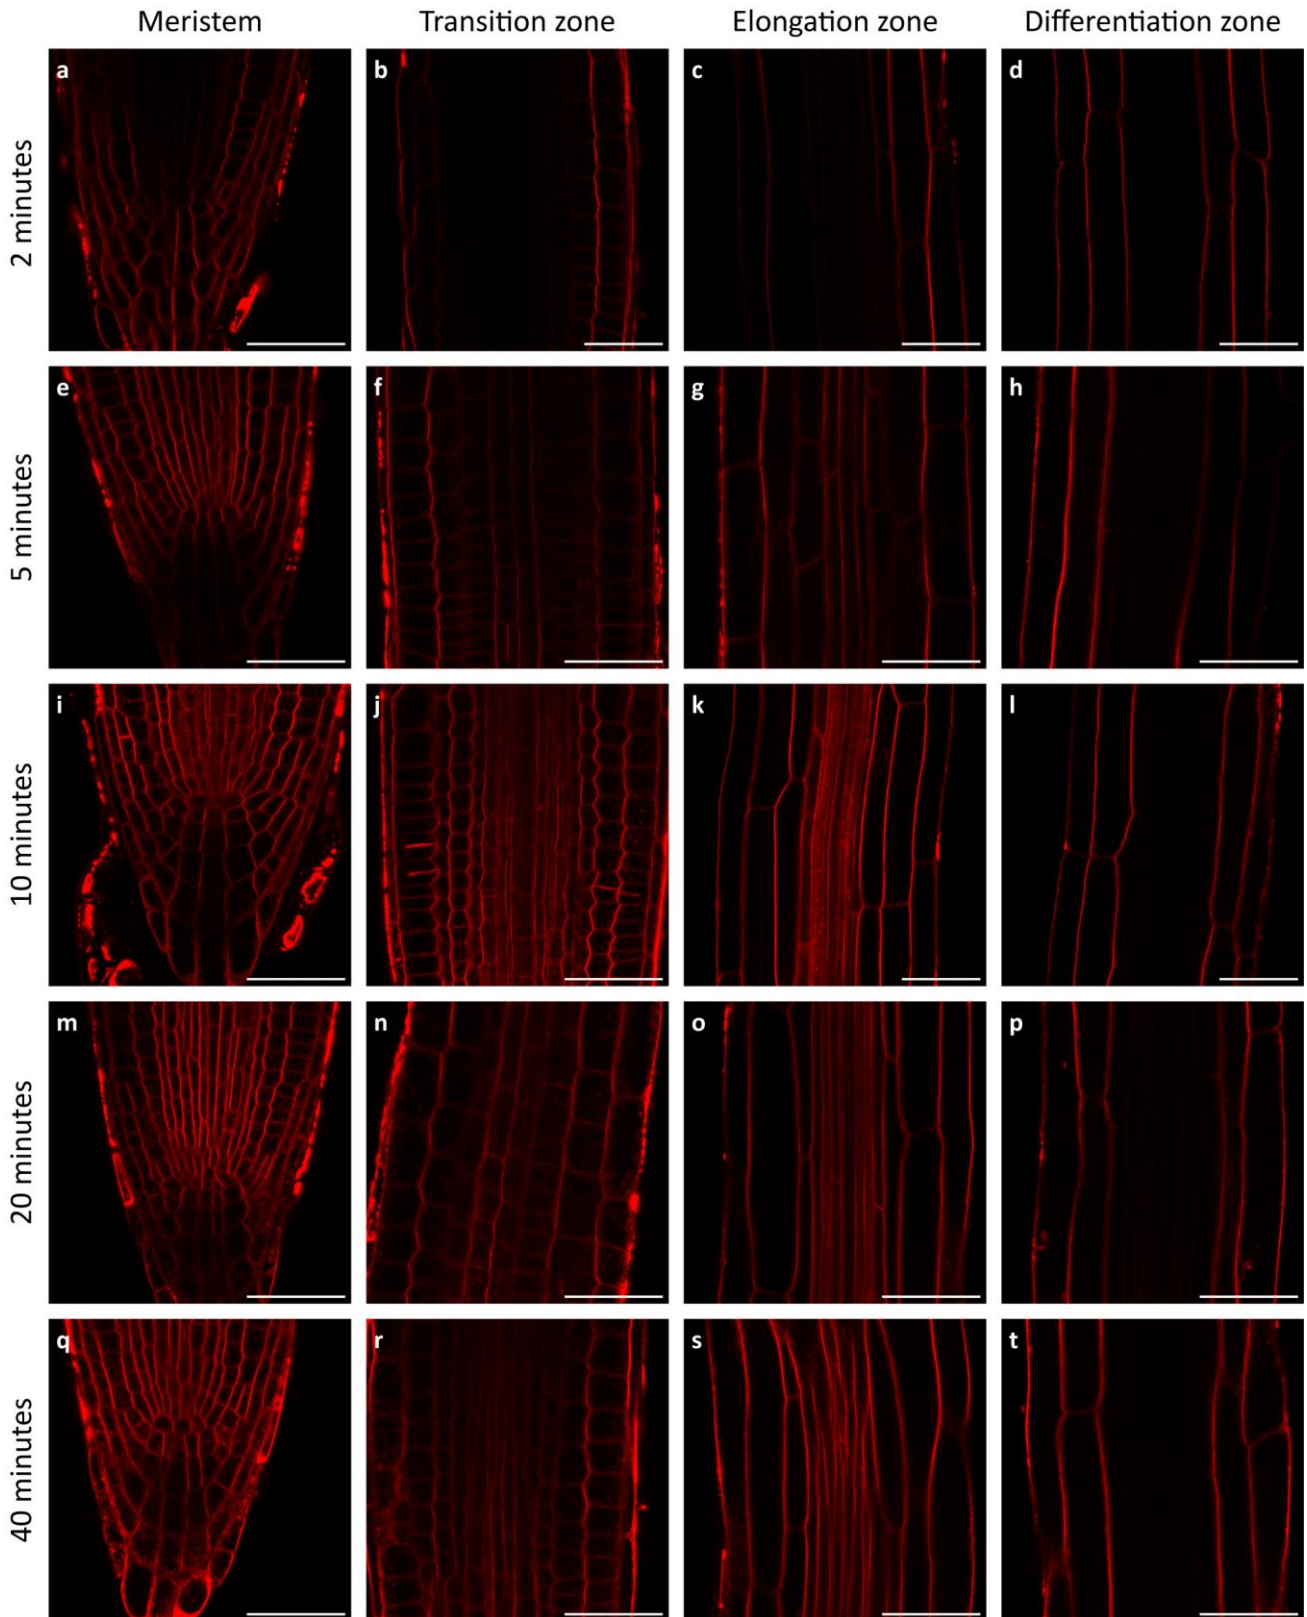

**Fig. S3.** Penetration depth of FM4-64 in different tissues over time.

Time series for FM4-64 at 20  $\mu$ M in 0.5x MS for different root tissues at time 2 minutes (**a-d**), 5 minutes (**d-h**), 10 minutes (**i-l**), 20 minutes (**m-p**), 40 minutes (**q-t**). All measurements were performed and processed the same way. Scale bar represents 40  $\mu$ m.

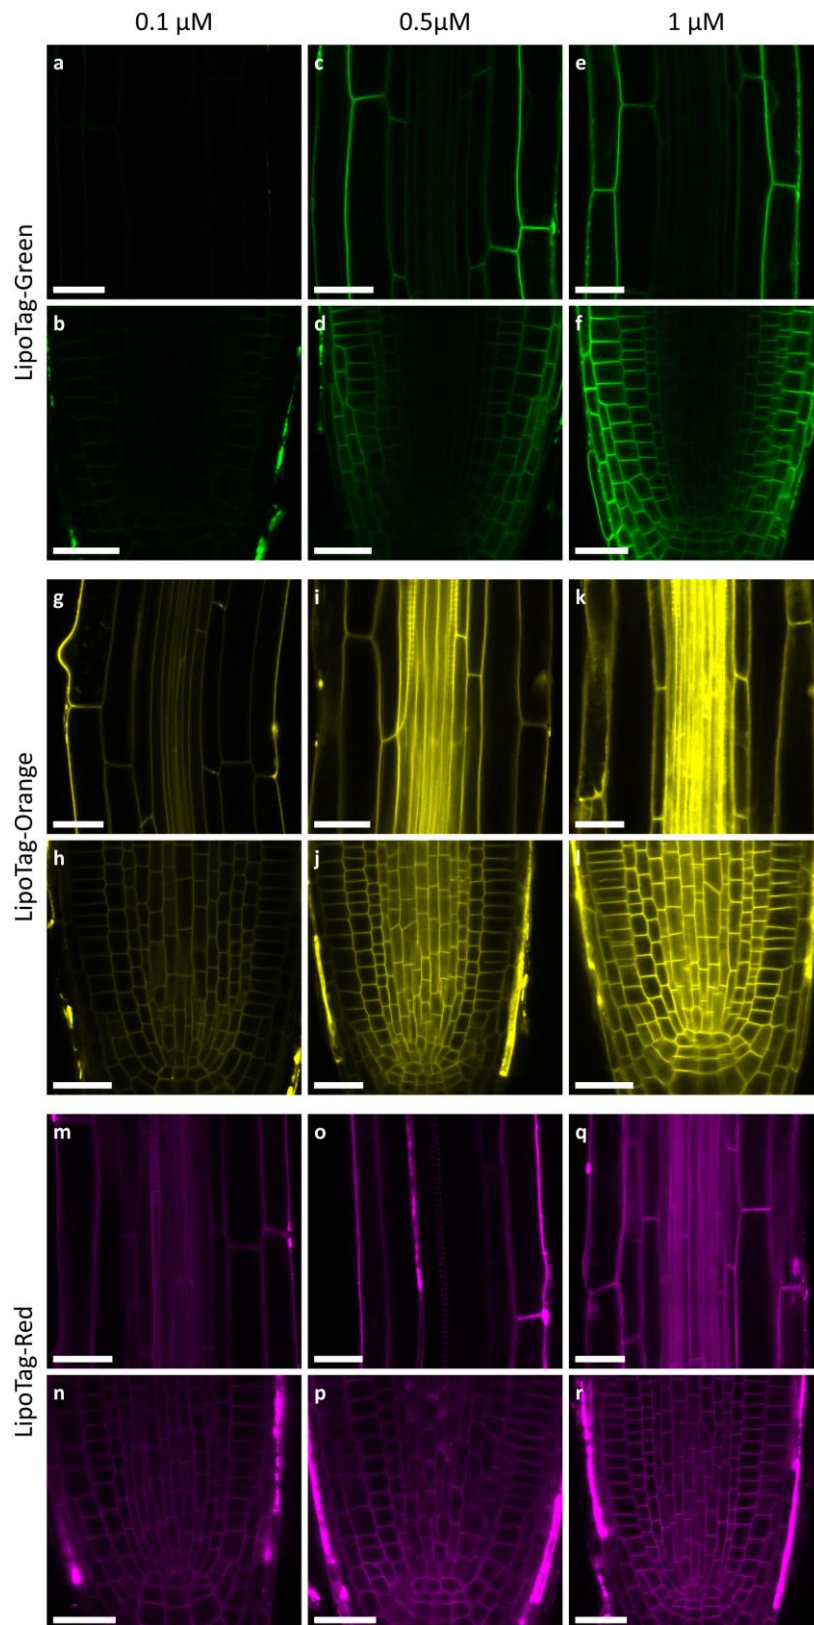

**Fig. S4.** Effect of staining concentration of non-functional LipoTag probes on tissue penetration after 30 minutes. **a-f**, Staining of LipoTag-Green in the elongation zone (**a,c,e**) and the root tip (**b,d,f**) after 30 minutes of incubation. **g-l**, Staining of LipoTag-Orange in the elongation zone (**g,i,k**) and the root tip (**h,j,l**) after 30 minutes of incubation. **m-r**, Staining of LipoTag-Red in the elongation zone (**m,o,q**) and the root tip (**n,p,r**) after 30 minutes of incubation. All measurements were performed and processed the same way. Scale bar represents 25 μm.

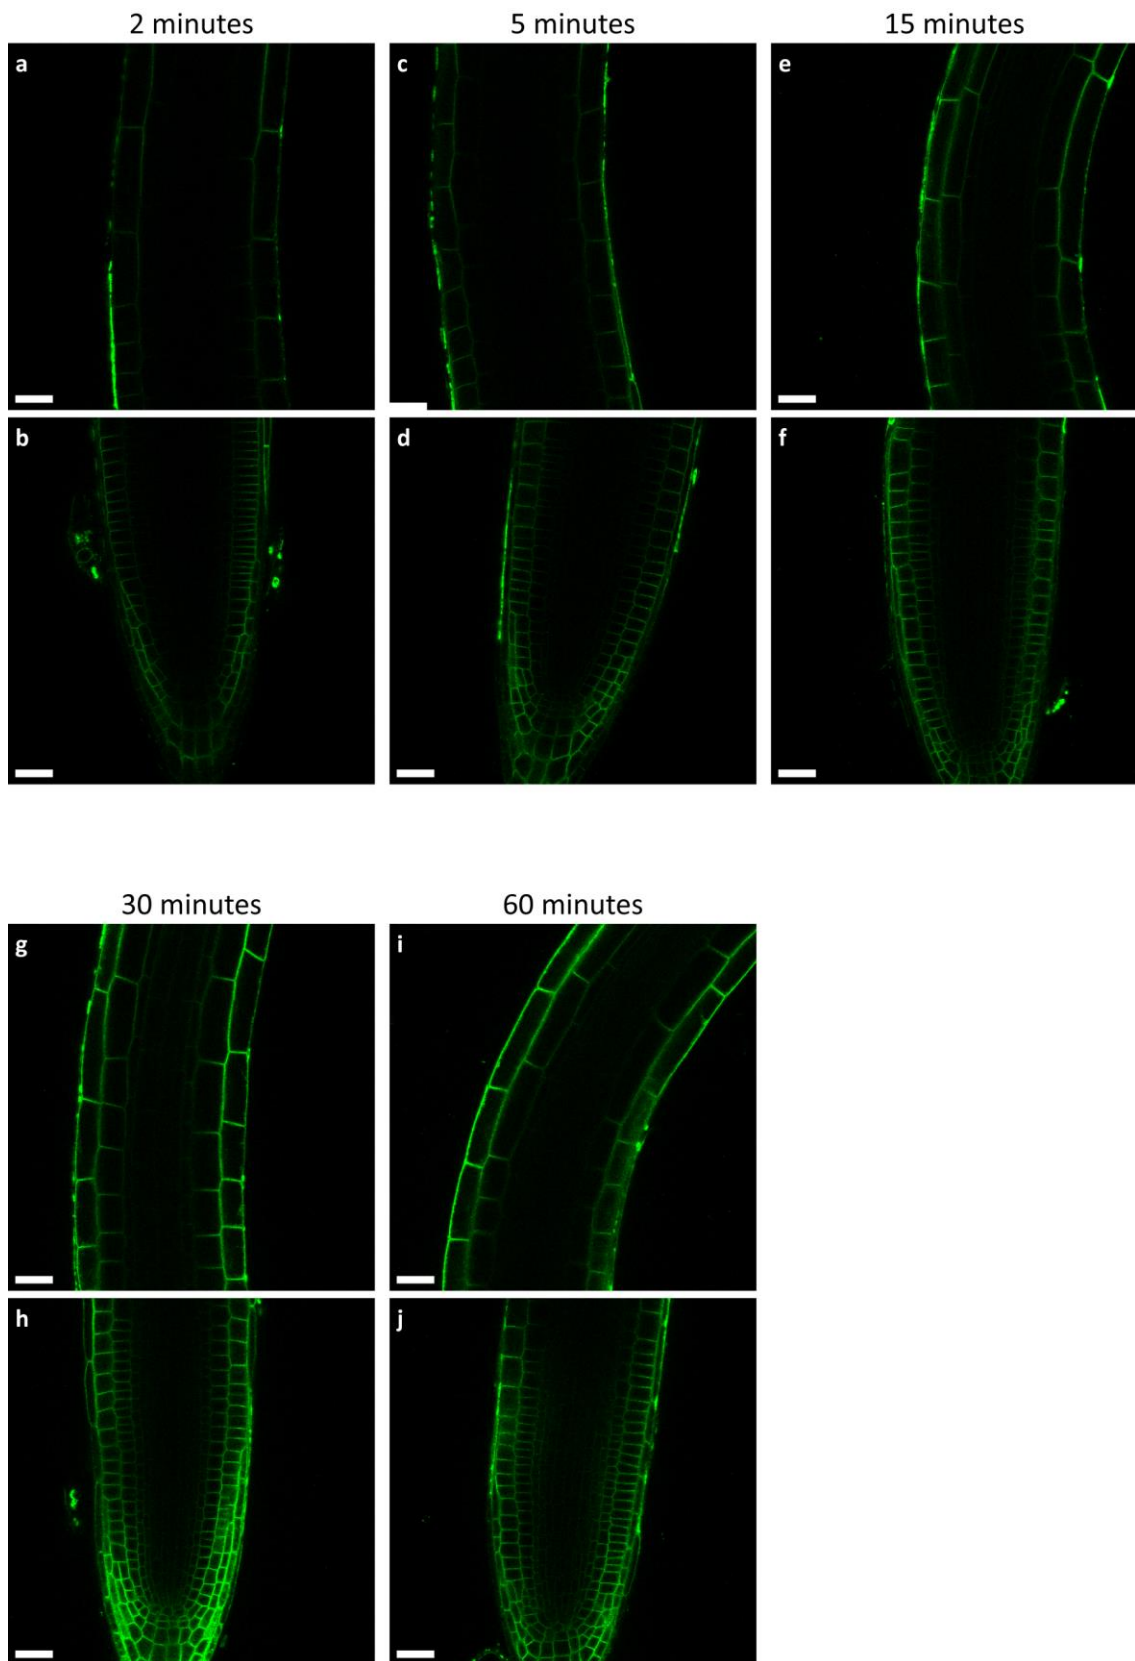

**Fig. S5.** Staining kinetics of LipoTag-Green in the root tip and elongation zone.

Images of Arabidopsis root stained with 0.5  $\mu\text{M}$  LipoTag-Green after 2 minutes (a,b), 5 minutes (c,d), 15 minutes (e,f), 30 minutes (g,h) and 60 minutes (i,j). All measurements were performed and processed the same way. Scale bar represents 25  $\mu\text{m}$ .

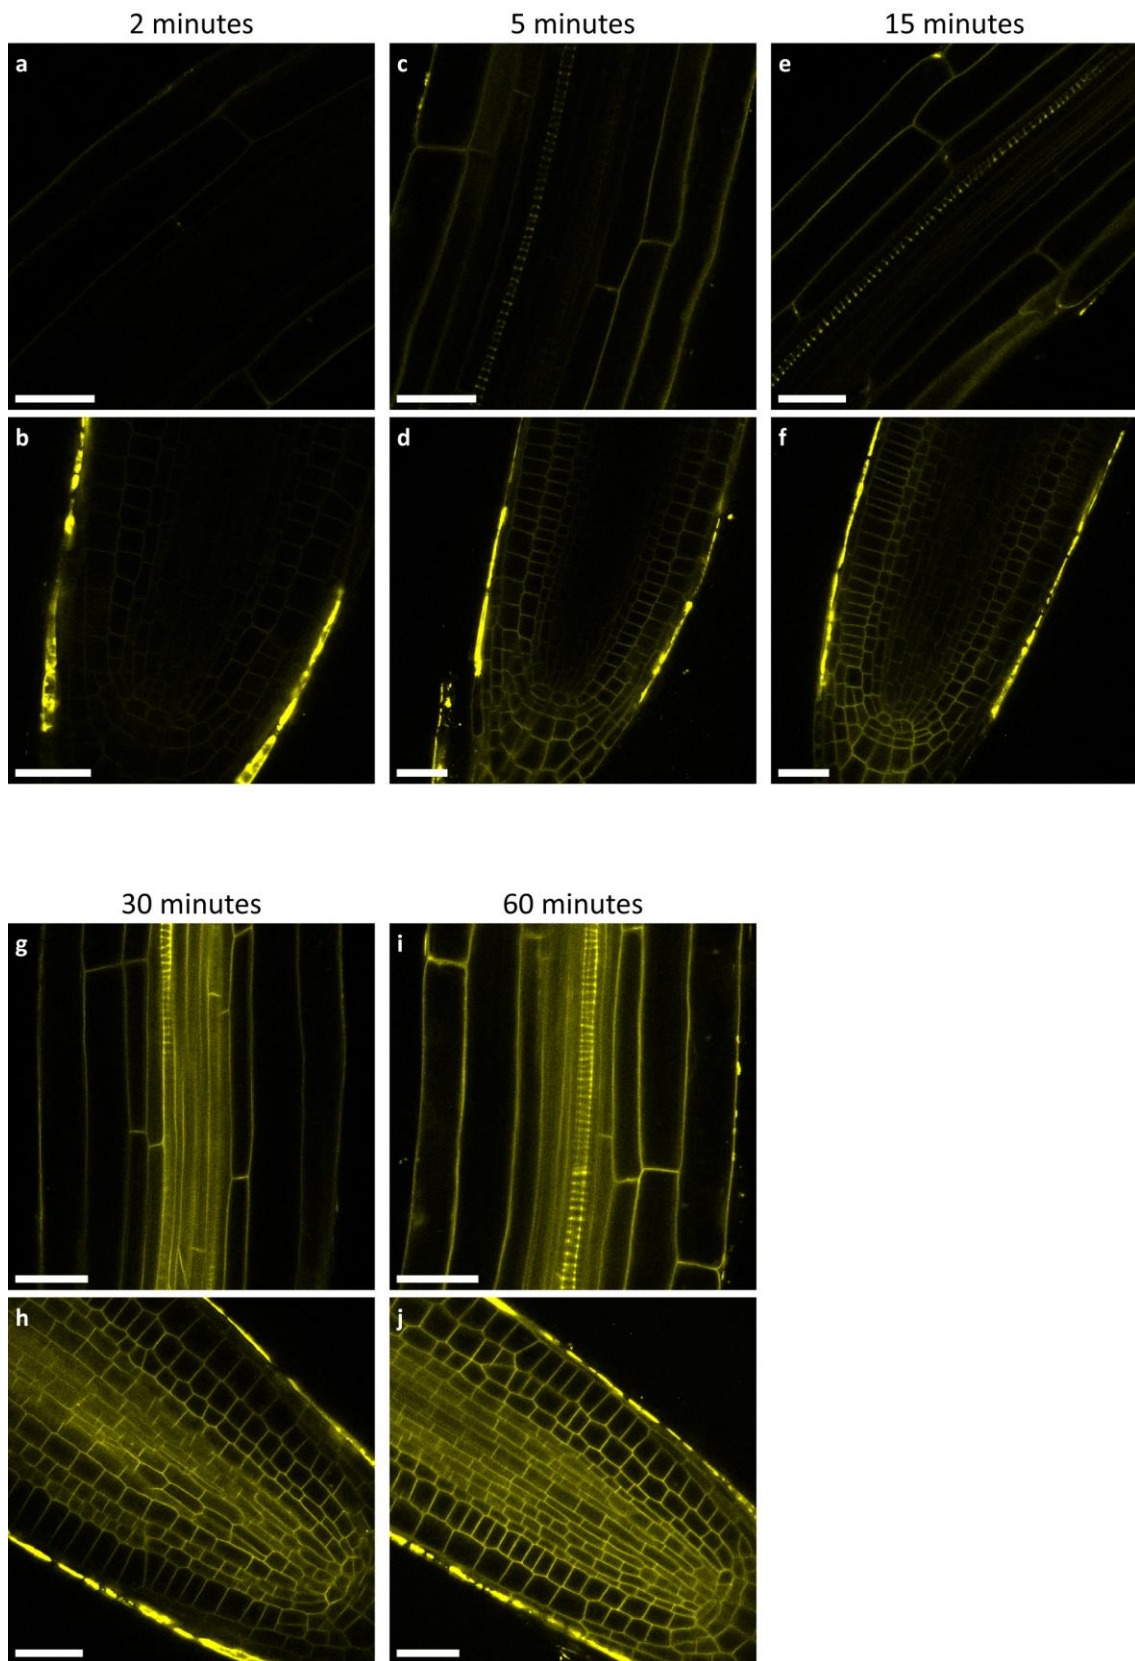

**Fig. S6.** Staining kinetics of LipoTag-Orange in the root tip and elongation zone.

Images of Arabidopsis root stained with 0.5  $\mu\text{M}$  LipoTag-Orange after 2 minutes (a,b), 5 minutes (c,d), 15 minutes (e,f), 30 minutes (g,h) and 60 minutes (i,j). All measurements were performed and processed the same way. Scale bar represents 25  $\mu\text{m}$ .

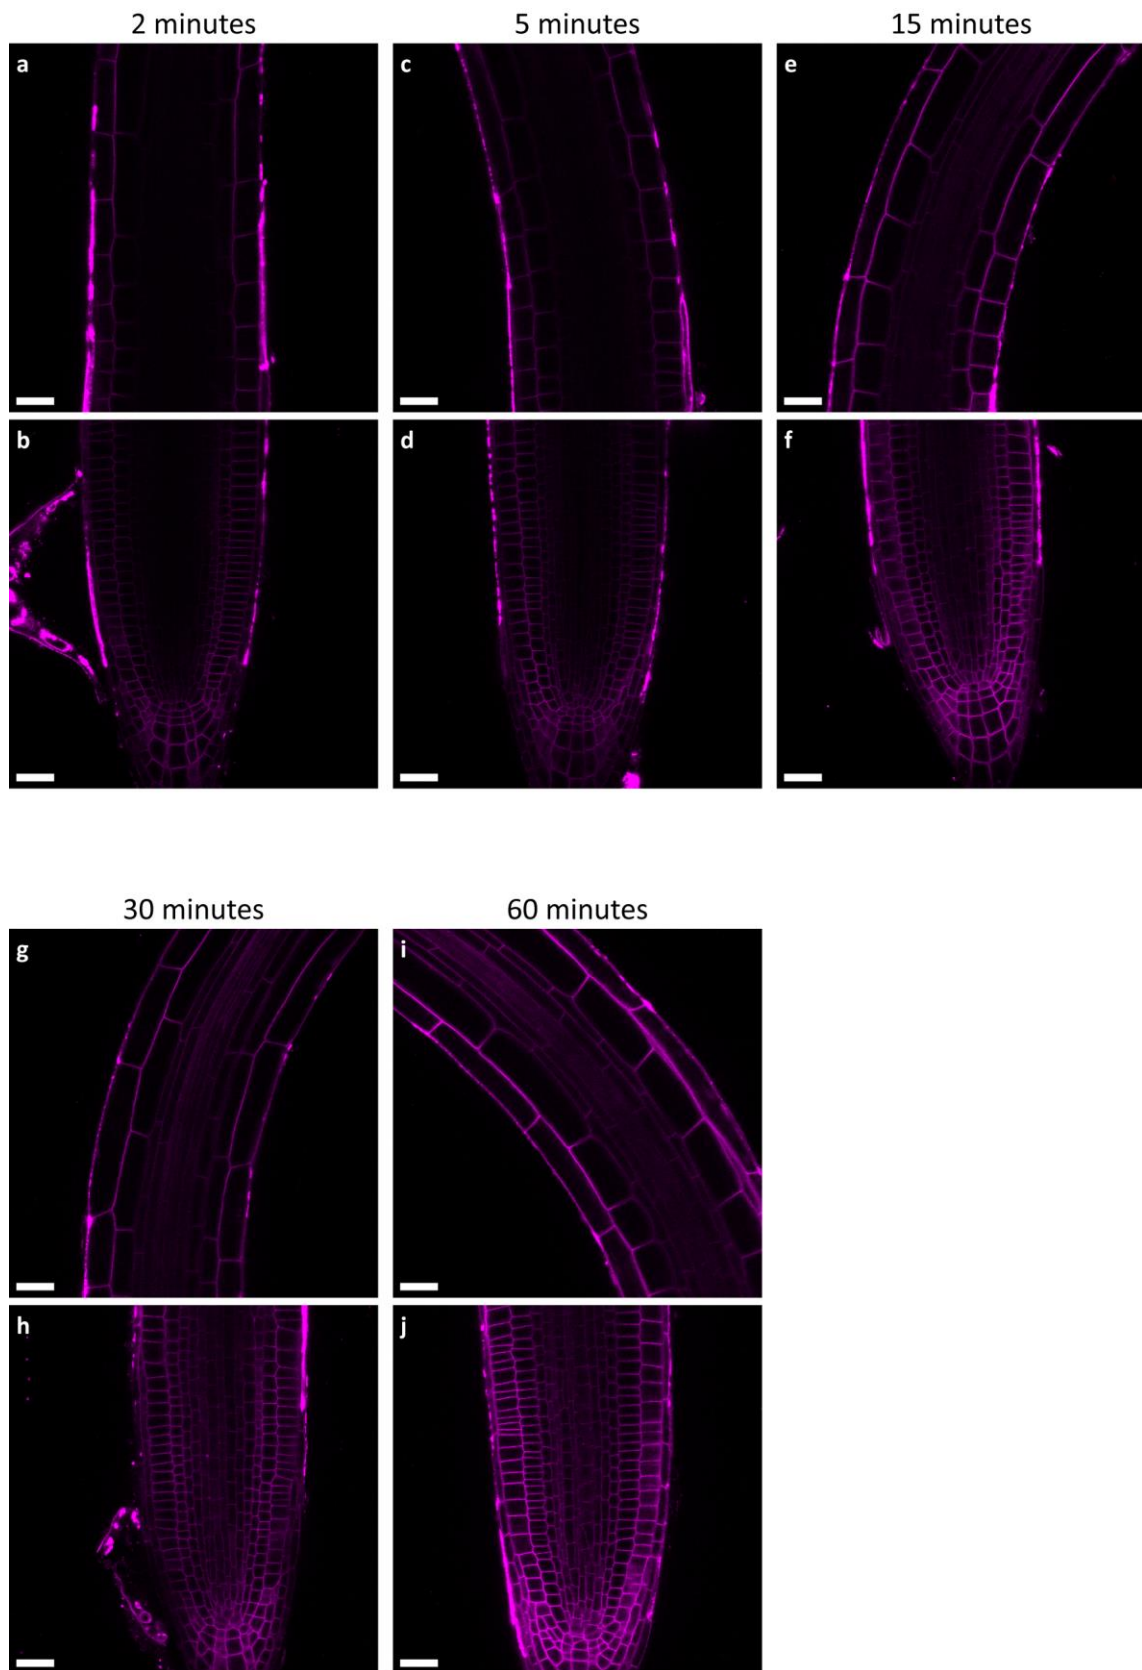

**Fig. S7.** Staining kinetics of LipoTag-Red in the root tip and elongation zone.

Images of Arabidopsis root stained with 0.5 μM LipoTag-Red after 2 minutes (**a,b**), 5 minutes (**c,d**), 15 minutes (**e,f**), 30 minutes (**g,h**) and 60 minutes (**i,j**). All measurements were performed and processed the same way. Scale bar represents 25 μm.

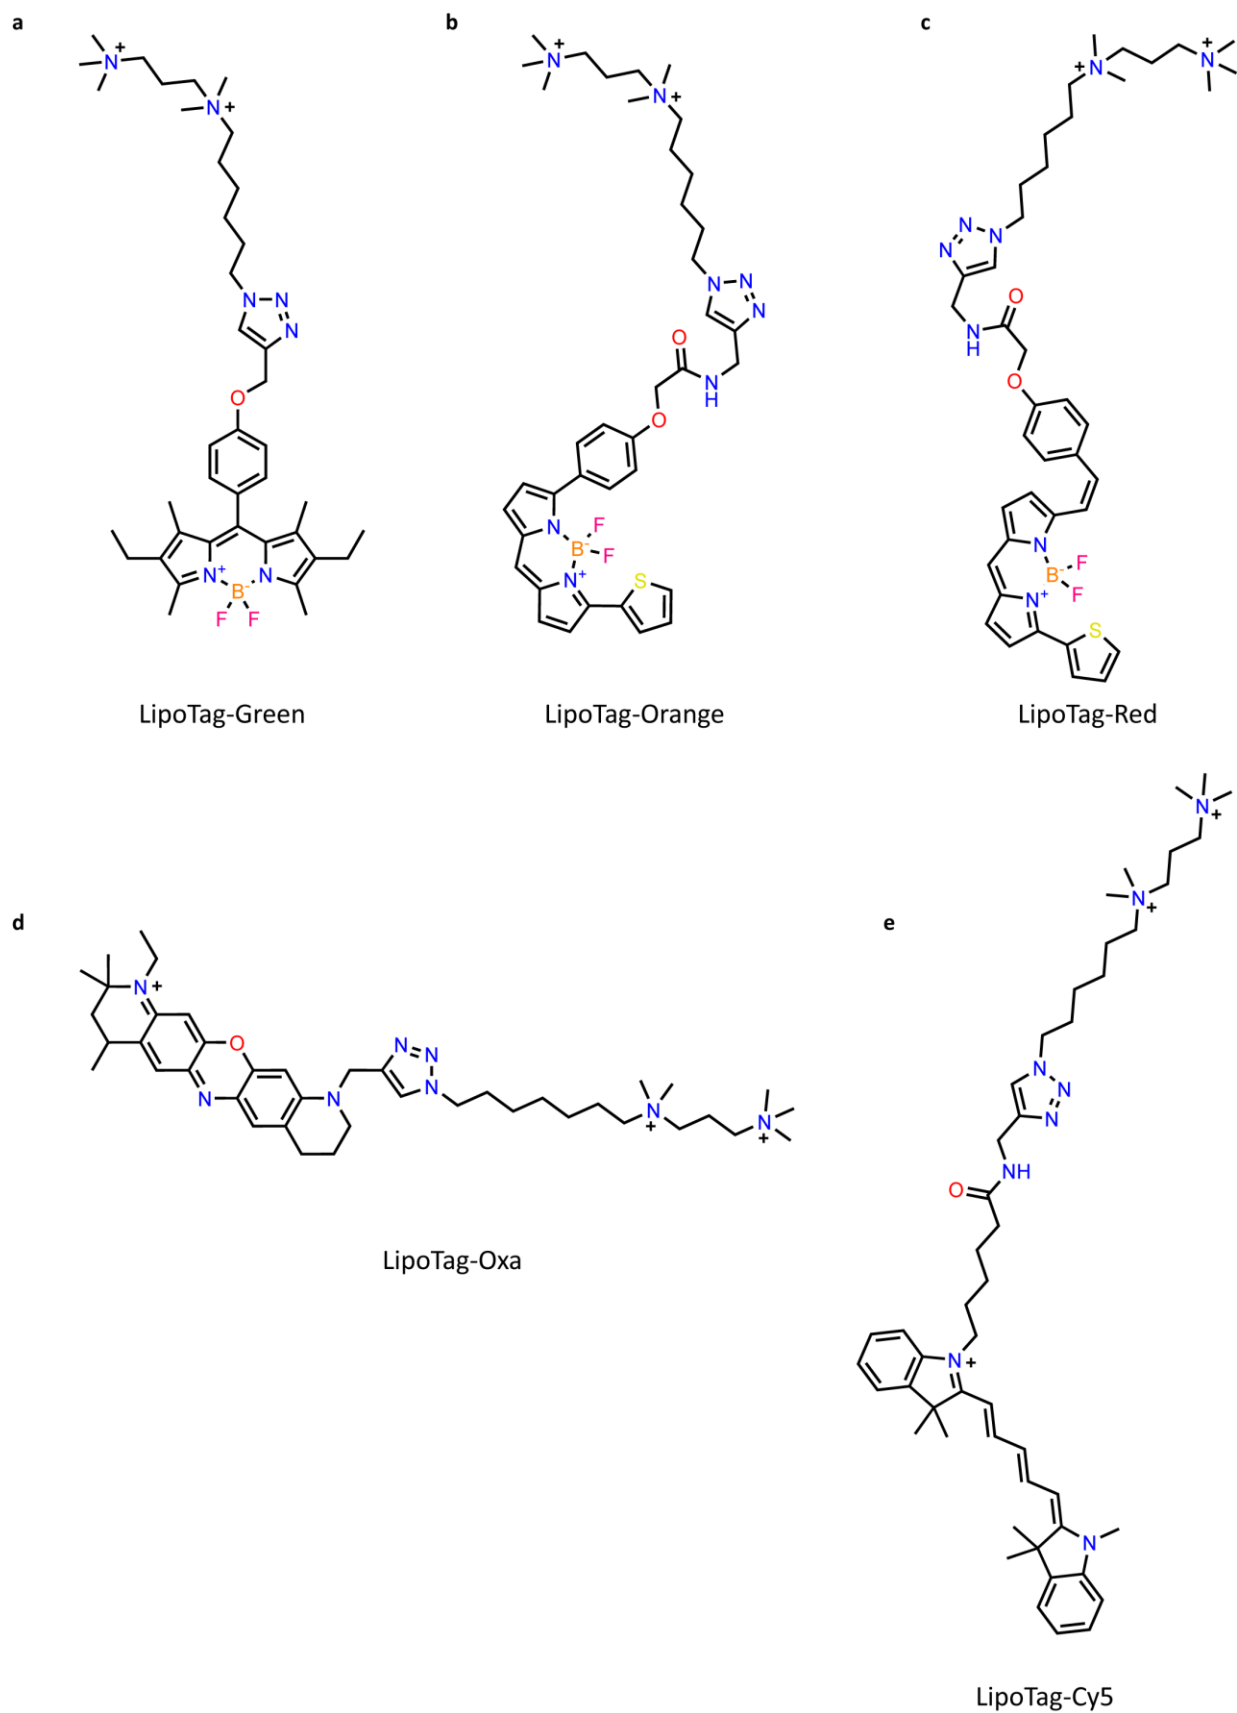

**Fig. S8.** Chemical structures of non-functional LipoTag probes.

Chemical structure of LipoTag-Green (a), LipoTag-Orange (b), LipoTag-Red (c), LipoTag-Oxa (d) and LipoTag-Cy5 (e)

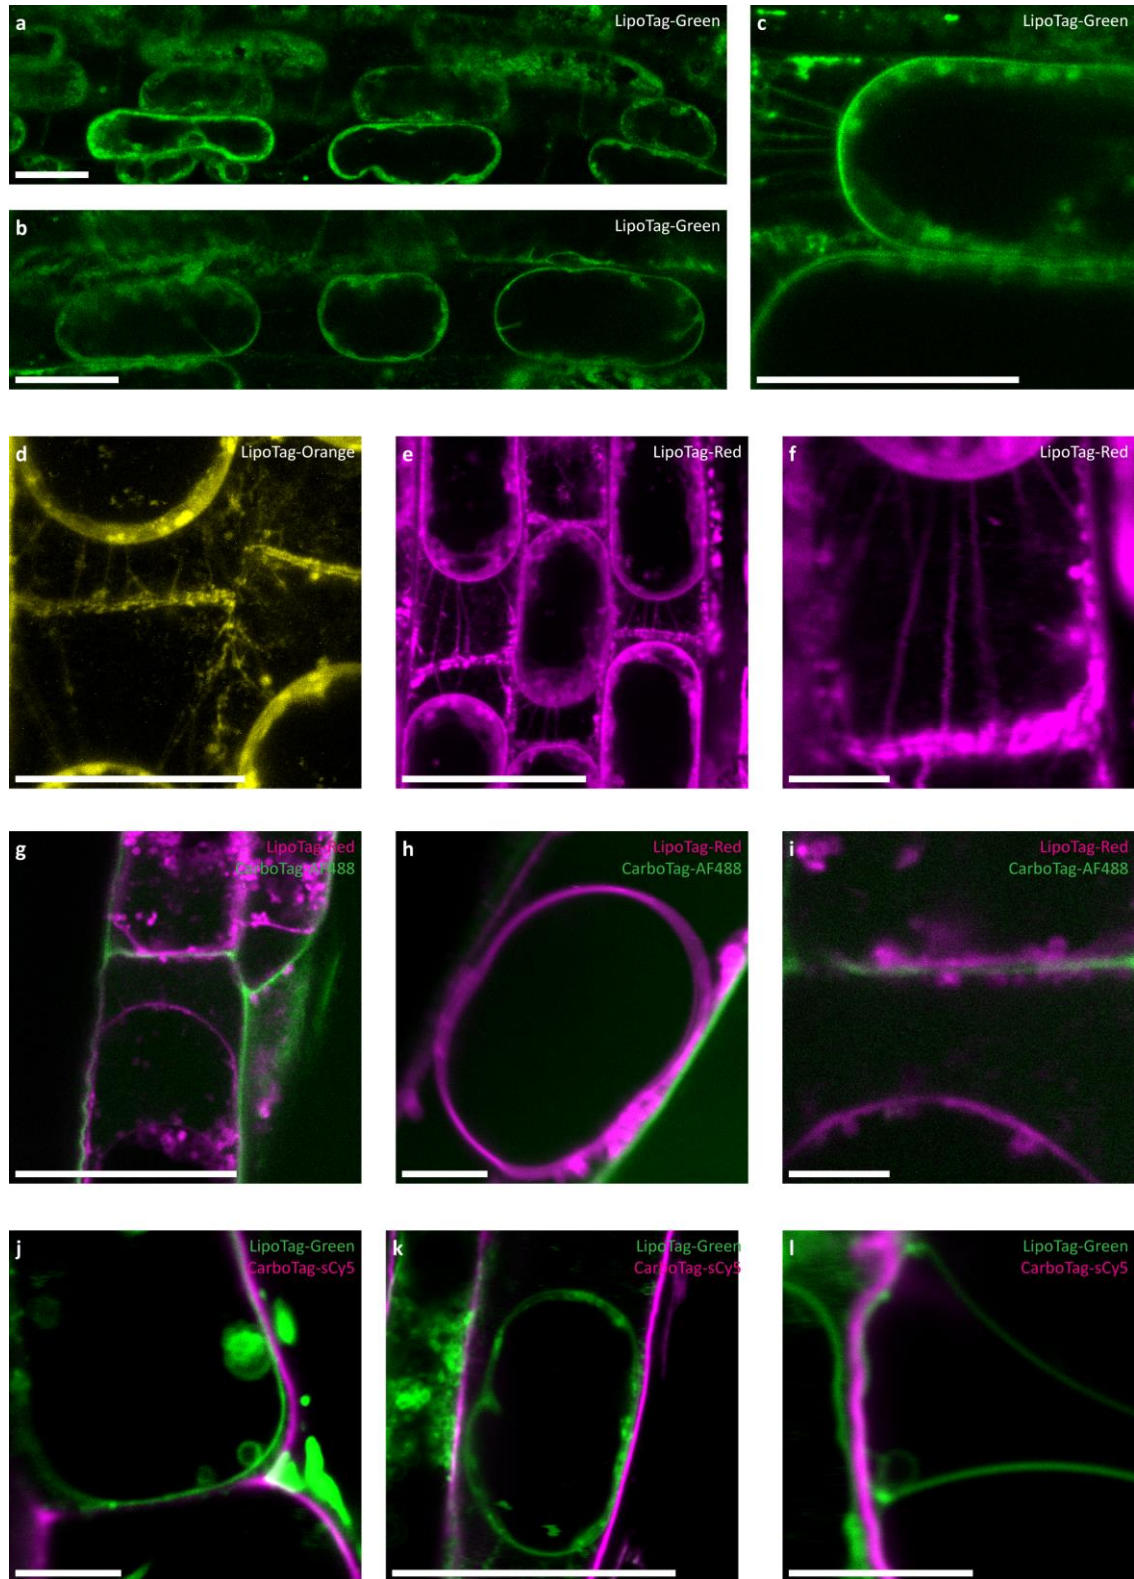

**Fig. S9.** Plasmolysis of LipoTag stained Arabidopsis roots.

Arabidopsis roots stained with LipoTag-Green (**a-c**), LipoTag-Orange (**b**) and LipoTag-Red (**e-f**) after gradual plasmolysis with 0.3 M mannitol followed by 0.5 M mannitol. Besides the retracted membrane Hechtian strands and the Hechtian reticulum are visible. To confirm membrane localization CarboTag-AF488 (green) and CarboTag-sCy5 (magenta) were used to co-stain the cell wall during plasmolysis with LipoTag-Red (magenta) (**g-i**) and LipoTag-Green (green) (**j-l**) respectively. Scale bars represent 5  $\mu\text{m}$  for **f**, **h**, **i**, **j** and **l**, all others represent 25  $\mu\text{m}$ .

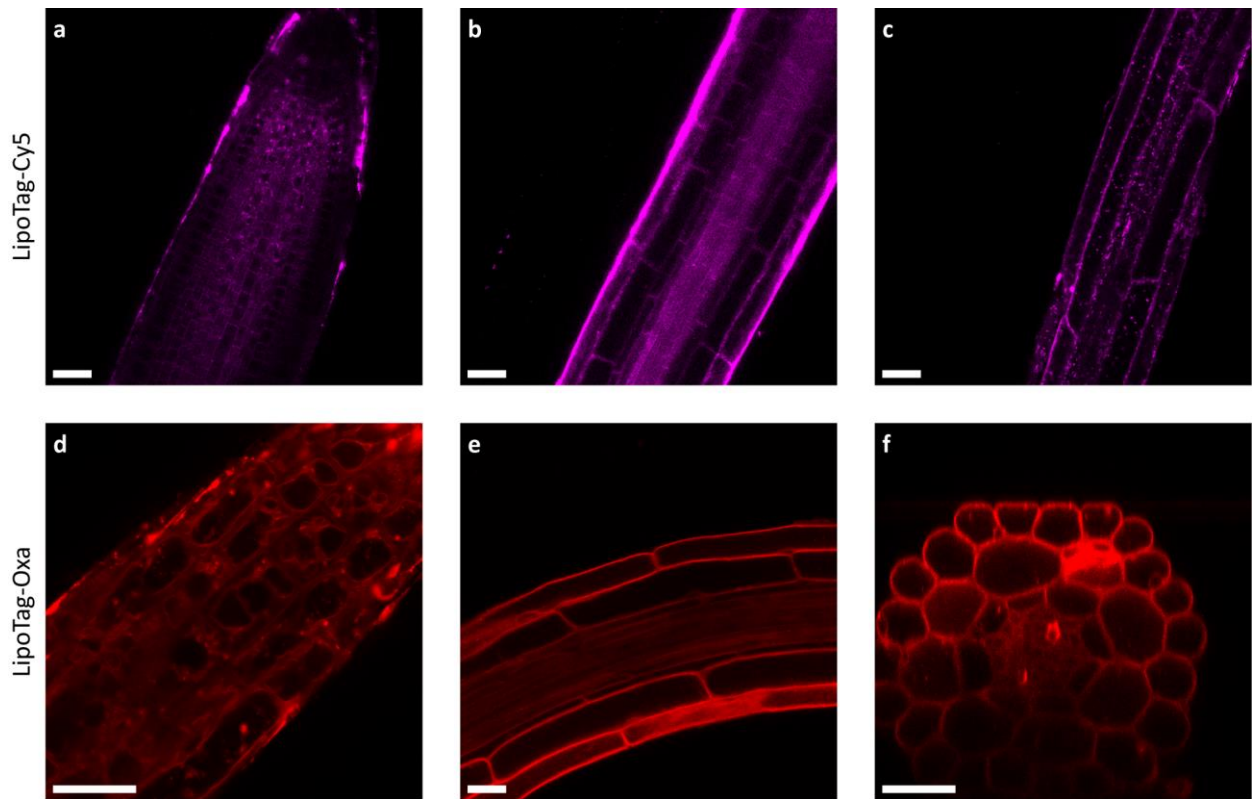

**Fig. S10.** Staining of Arabidopsis roots with LipoTag-Cy5 and LipoTag-Oxa.

Staining of Arabidopsis roots with 1  $\mu\text{M}$  LipoTag-Cy5 (**a-c**) and 1  $\mu\text{M}$  LipoTag-Oxa (**d**) and 0.1  $\mu\text{M}$  LipoTag-Oxa (**e-f**). **f** is a xzy projection. Scale bars represent 25  $\mu\text{m}$ .

LipoTag-Green

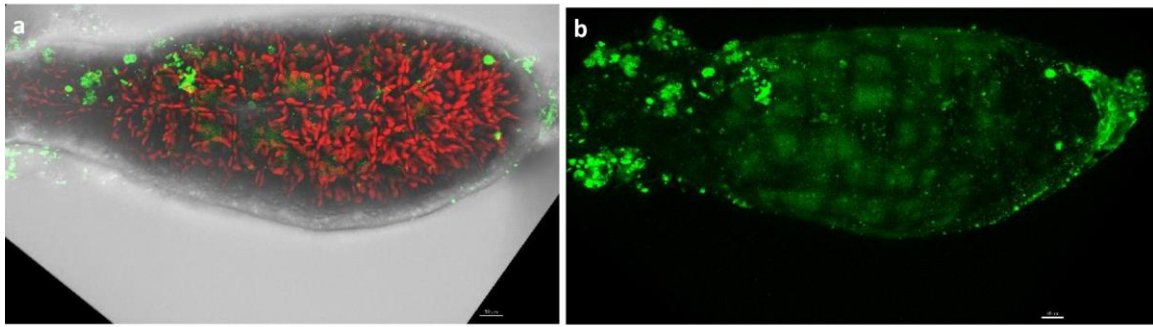

LipoTag-Orange

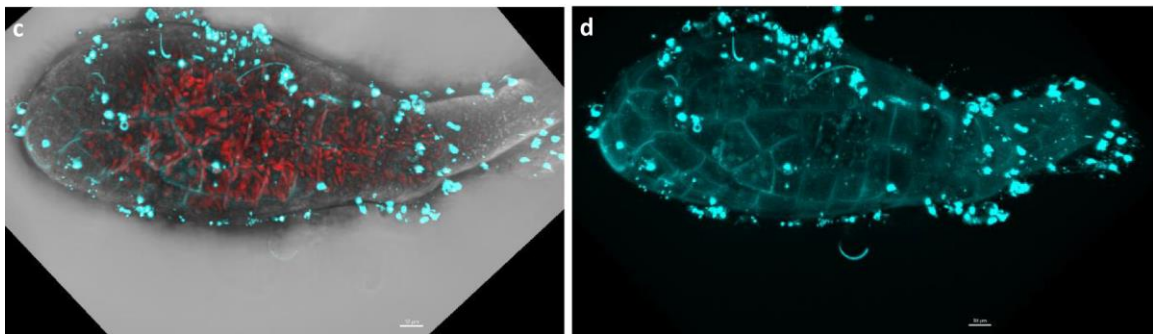

LipoTag-Red

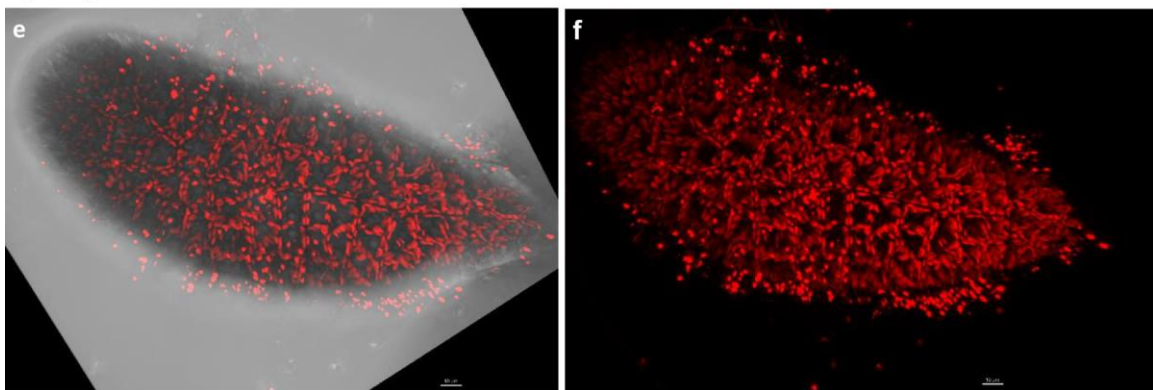

**Fig. S11.** Staining of *F. serratus* with LipoTag probes.

Images of *F. serratus* stained with LipoTag-Green (green) (**a-b**) with the brightfield overlay shown in **a**, LipoTag-Orange (cyan) (**c-d**) with the brightfield overlay shown in **c** and LipoTag-Red (red) (**e-f**) with the brightfield overlay shown in **e**. Chlorophyll autofluorescence is shown in red, scale bars represent 10  $\mu\text{m}$ .

LipoTag-Green

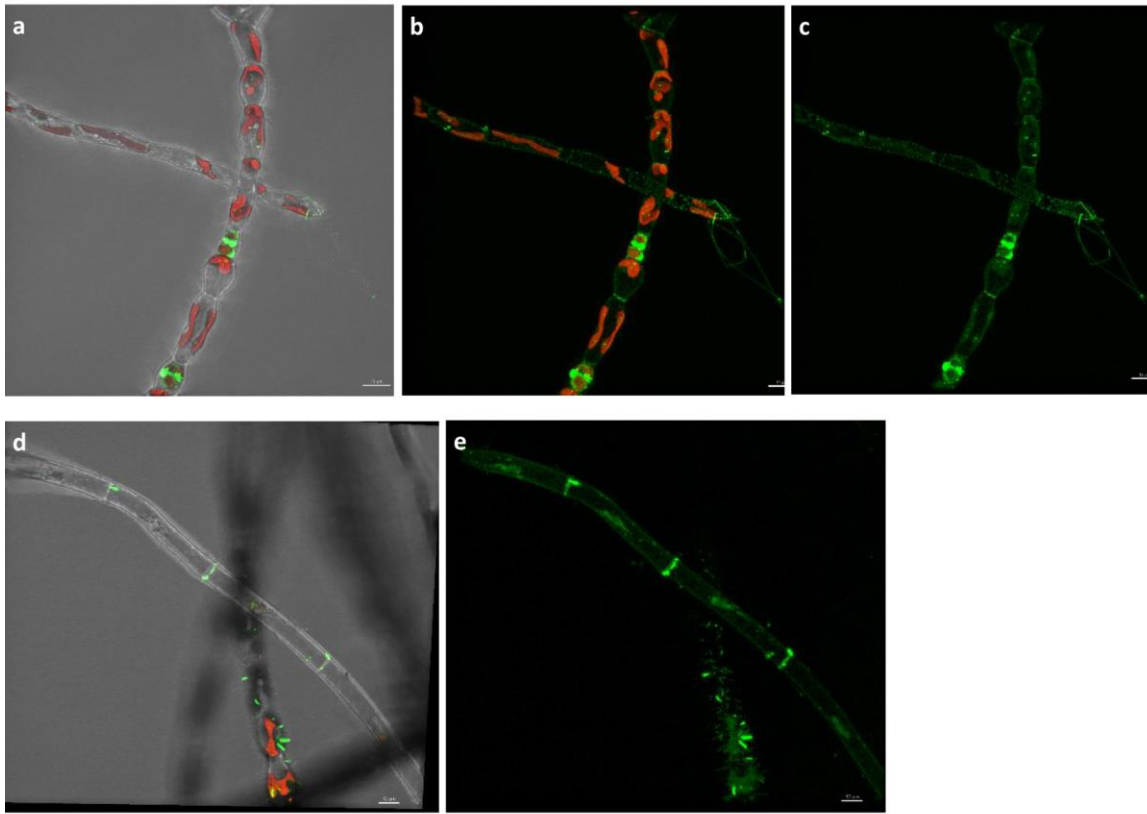

LipoTag-Orange

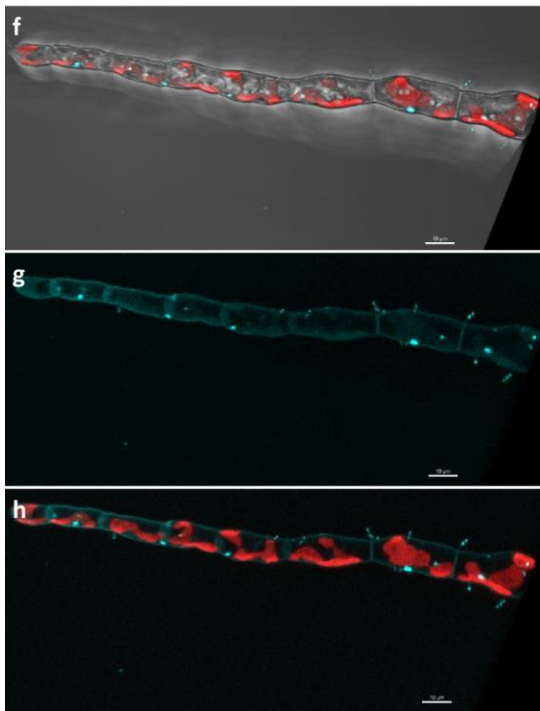

LipoTag-Red

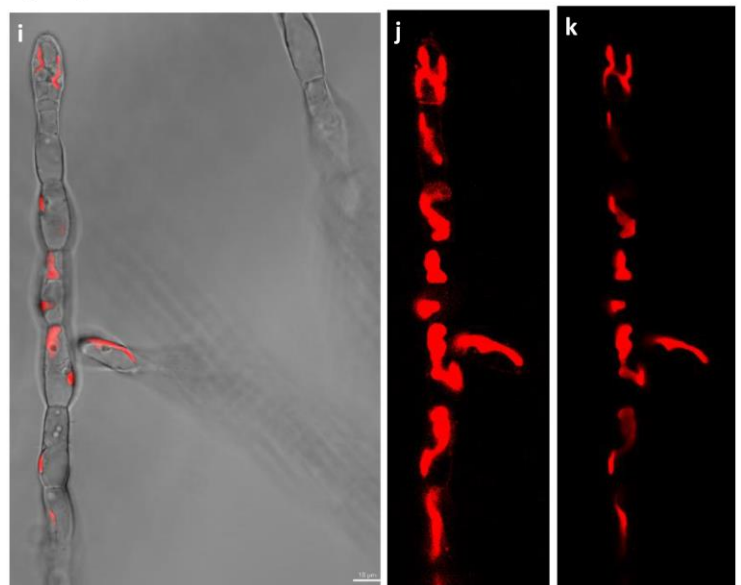

**Fig. S12.** Staining of *Ectocarpus* sp. with LipoTag probes.

Images of *Ectocarpus* sp. stained with LipoTag-Green (green) (a-e) with the brightfield overlay shown in a and d, LipoTag-Orange (cyan) (f-h) with the brightfield overlay shown in f and LipoTag-Red (red) (i-k) with the brightfield overlay shown in i. Chlorophyll autofluorescence is shown in red, scale bars represent 10 μm.

LipoTag-Green

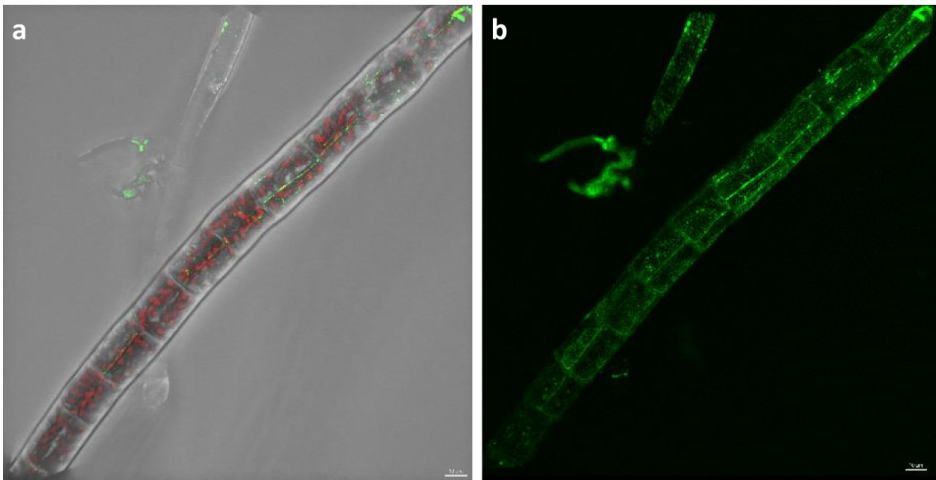

LipoTag-Orange

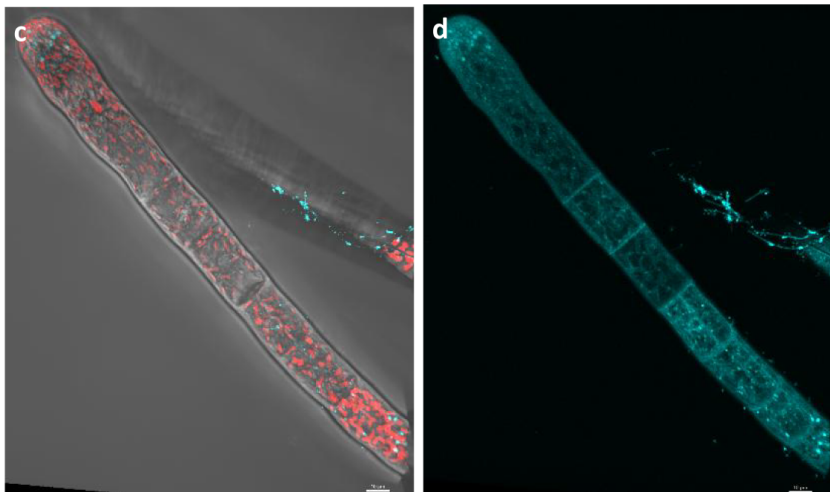

LipoTag-Red

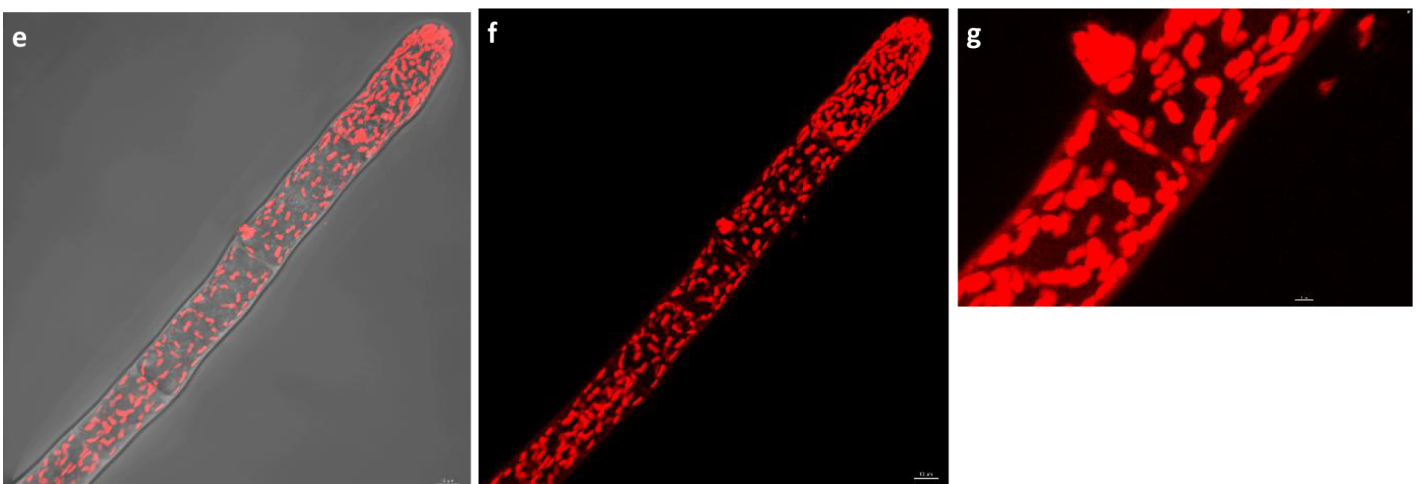

**Fig. S13.** Staining of *S. rigidula* with LipoTag probes.

Images of *S. rigidula* stained with LipoTag-Green (green) (a-b) with the brightfield overlay shown in a, LipoTag-Orange (cyan) (c-d) with the brightfield overlay shown in c and LipoTag-Red (red) (e-g) with the brightfield overlay shown in e. Chlorophyll autofluorescence is shown in red, scale bars represent 10  $\mu\text{m}$ .

LipoTag-Green

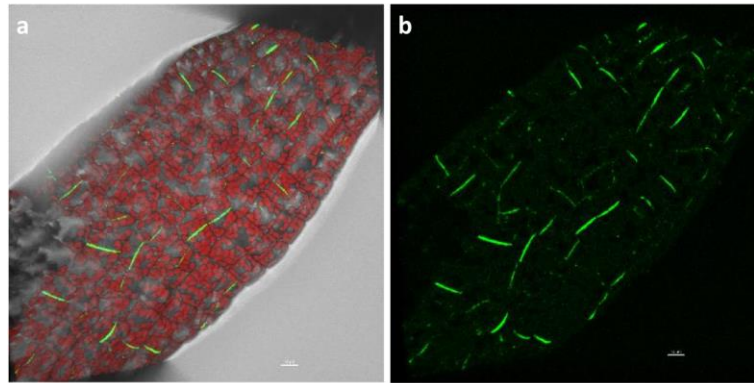

LipoTag-Orange

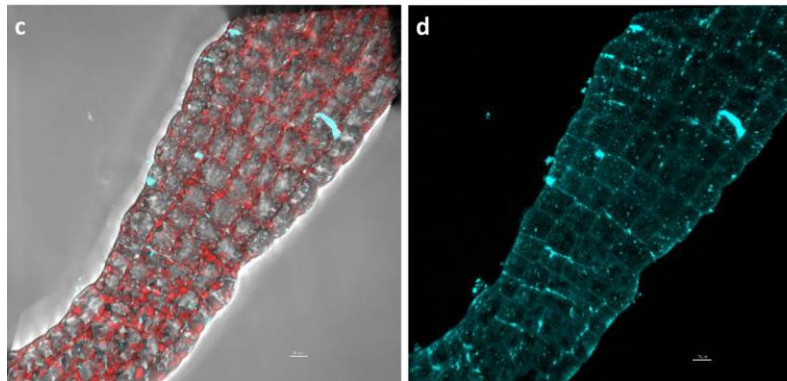

LipoTag-Red

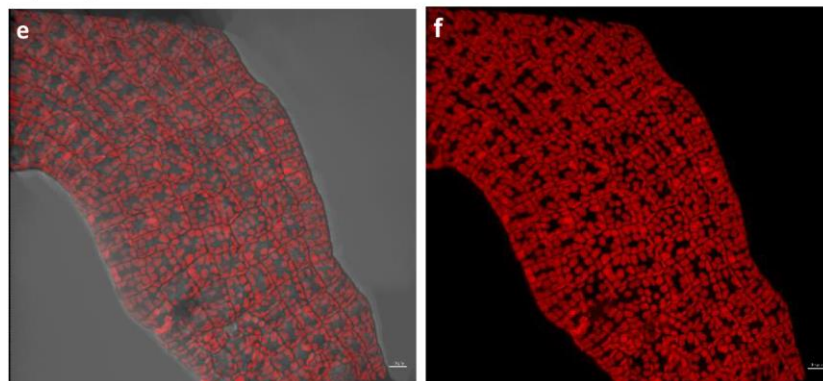

**Fig. S14.** Staining of *S. latissima* with LipoTag probes.

Images of *S. latissima* stained with LipoTag-Green (green) (a-b) with the brightfield overlay shown in a, LipoTag-Orange (cyan) (c-d) with the brightfield overlay shown in c and LipoTag-Red (red) (e-f) with the brightfield overlay shown in e. Chlorophyll autofluorescence is shown in red, scale bars represent 10  $\mu\text{m}$ .

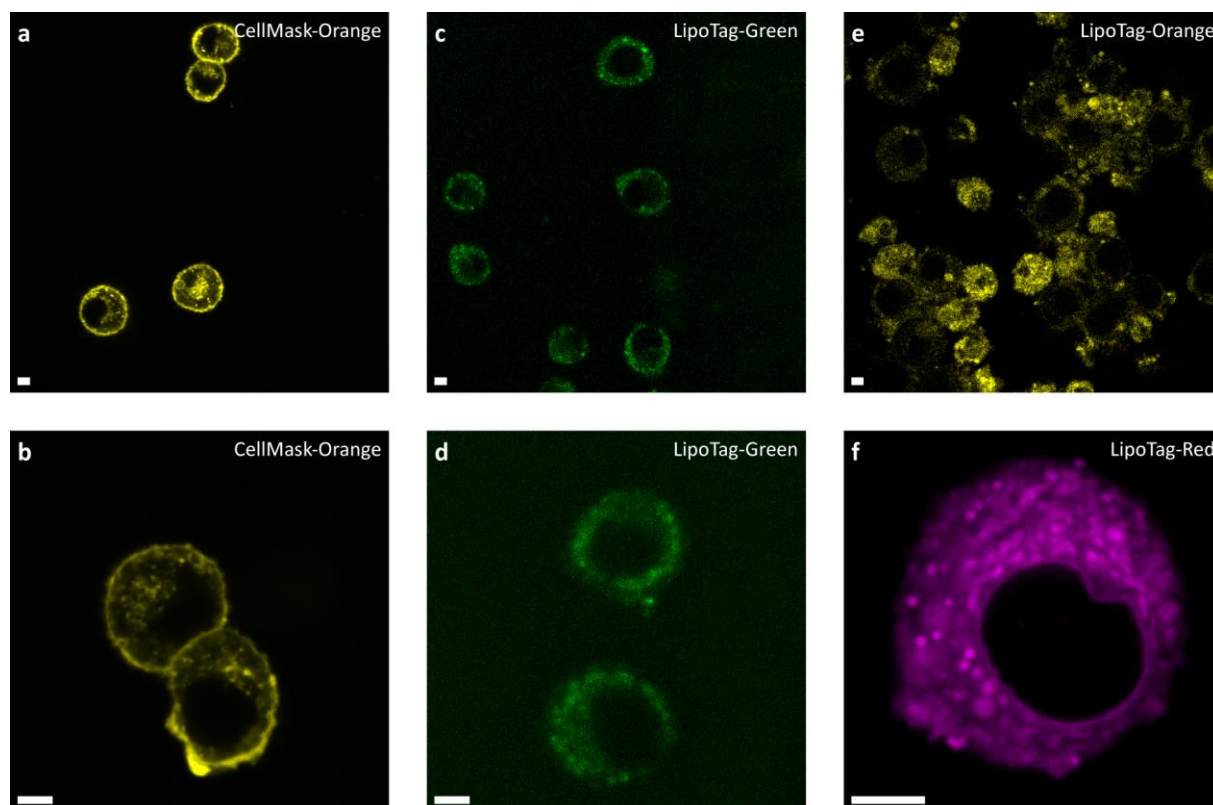

**Fig. S15.** Staining of Murine macrophage cells with LipoTag dyes.

Images of Murine cells stained with Cellmask-Orange (**a-b**), LipoTag-Green (**c-d**), LipoTag-Orange (**e**) and LipoTag-Red (**f**). Scale bars represent 5 μm.

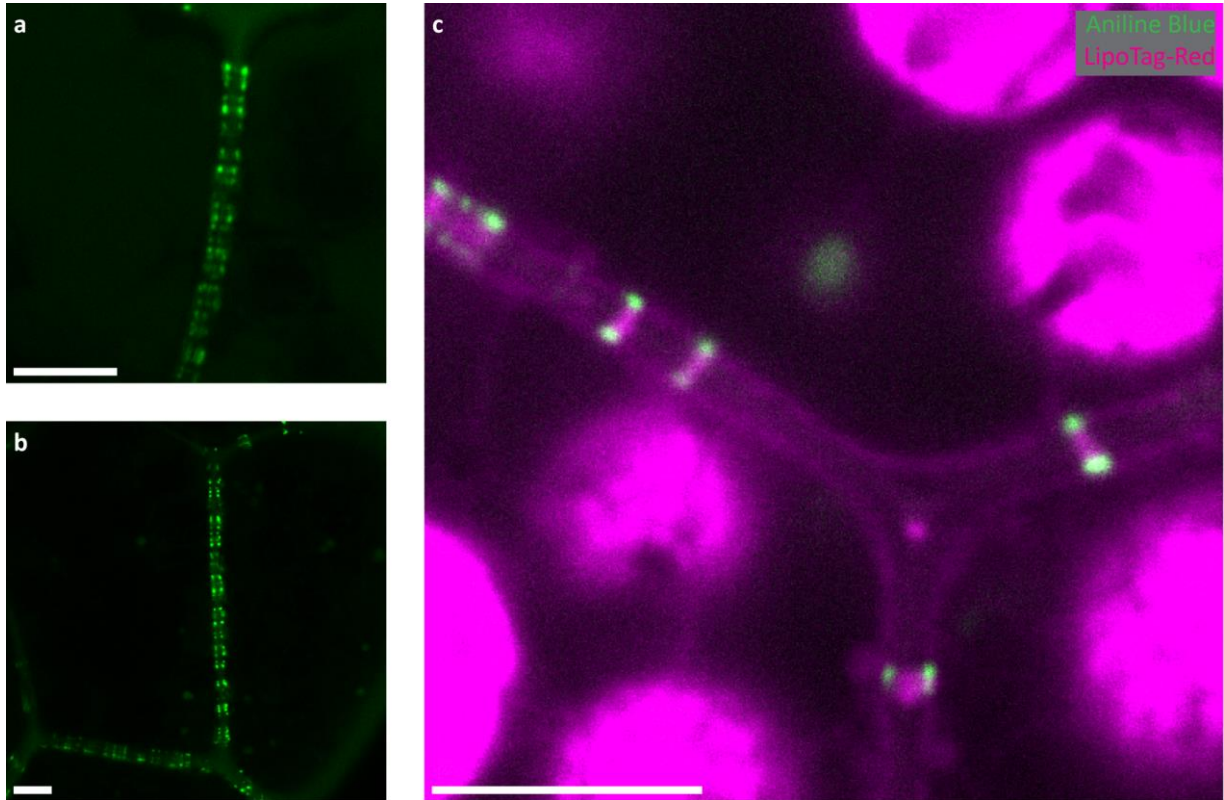

**Fig. S16.** Staining of plasmodesmata in *Marchantia* gemmae.

Staining of plasmodesmata in *Marchantia* gemmae with Aniline Blue (**a-b**) and gemmae co-stained with Aniline Blue (green) and LipoTag-Red (magenta) (**c**). Autofluorescence of chlorophyll is visible together with the outline of cell membranes and the plasmodesmata membrane. Scale bars represent 5  $\mu\text{m}$ .

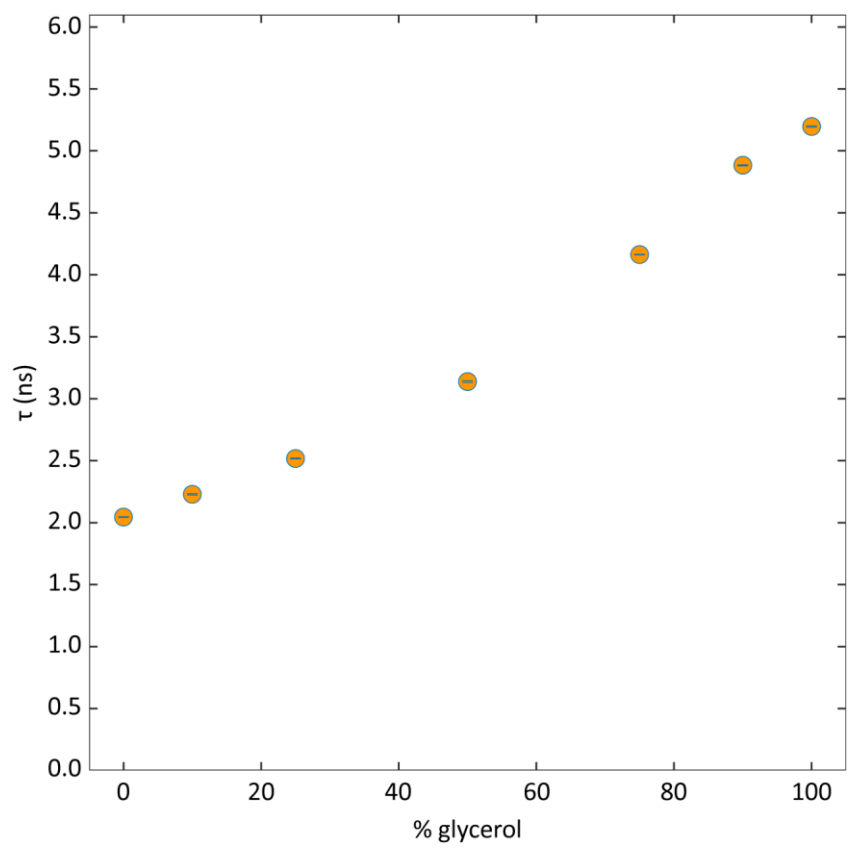

**Fig. S17.** Calibration of LipoTag-BDP.

Fluorescence lifetime of LipoTag-BDP in mixtures with varying glycerol concentration. All measurements were repeated 5 times, error bars fall within the point size.

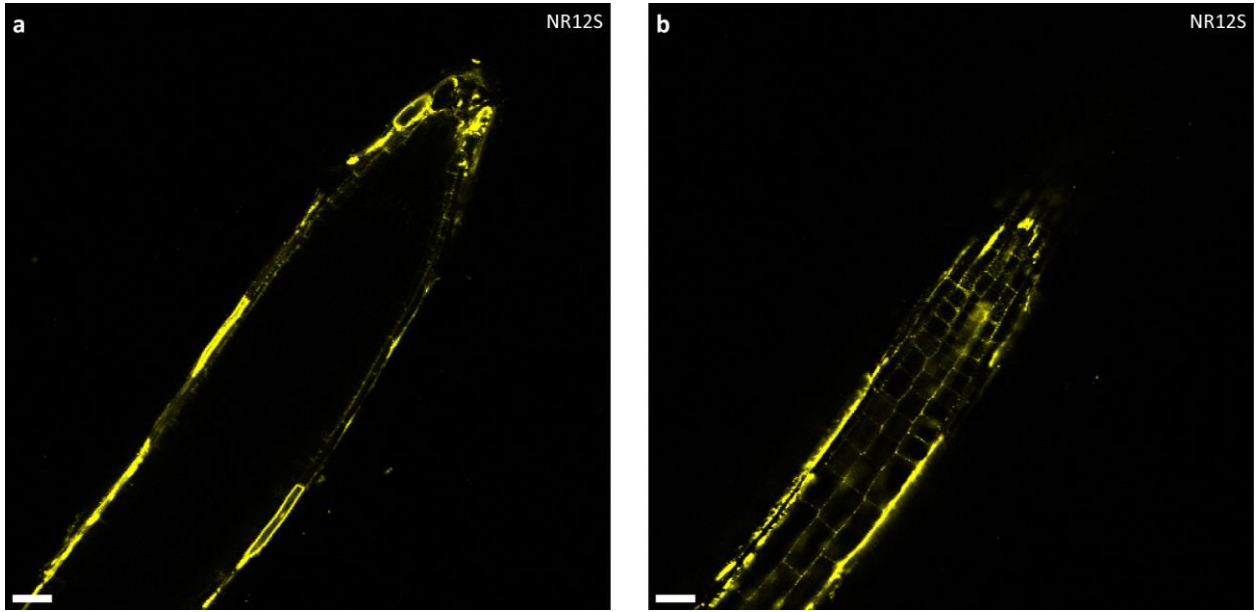

**Fig. S18.** Staining of Arabidopsis root with NR12S.

Staining of Arabidopsis root with 10  $\mu\text{M}$  NR12S for 1 hour. Scale bars represent 25  $\mu\text{m}$ .

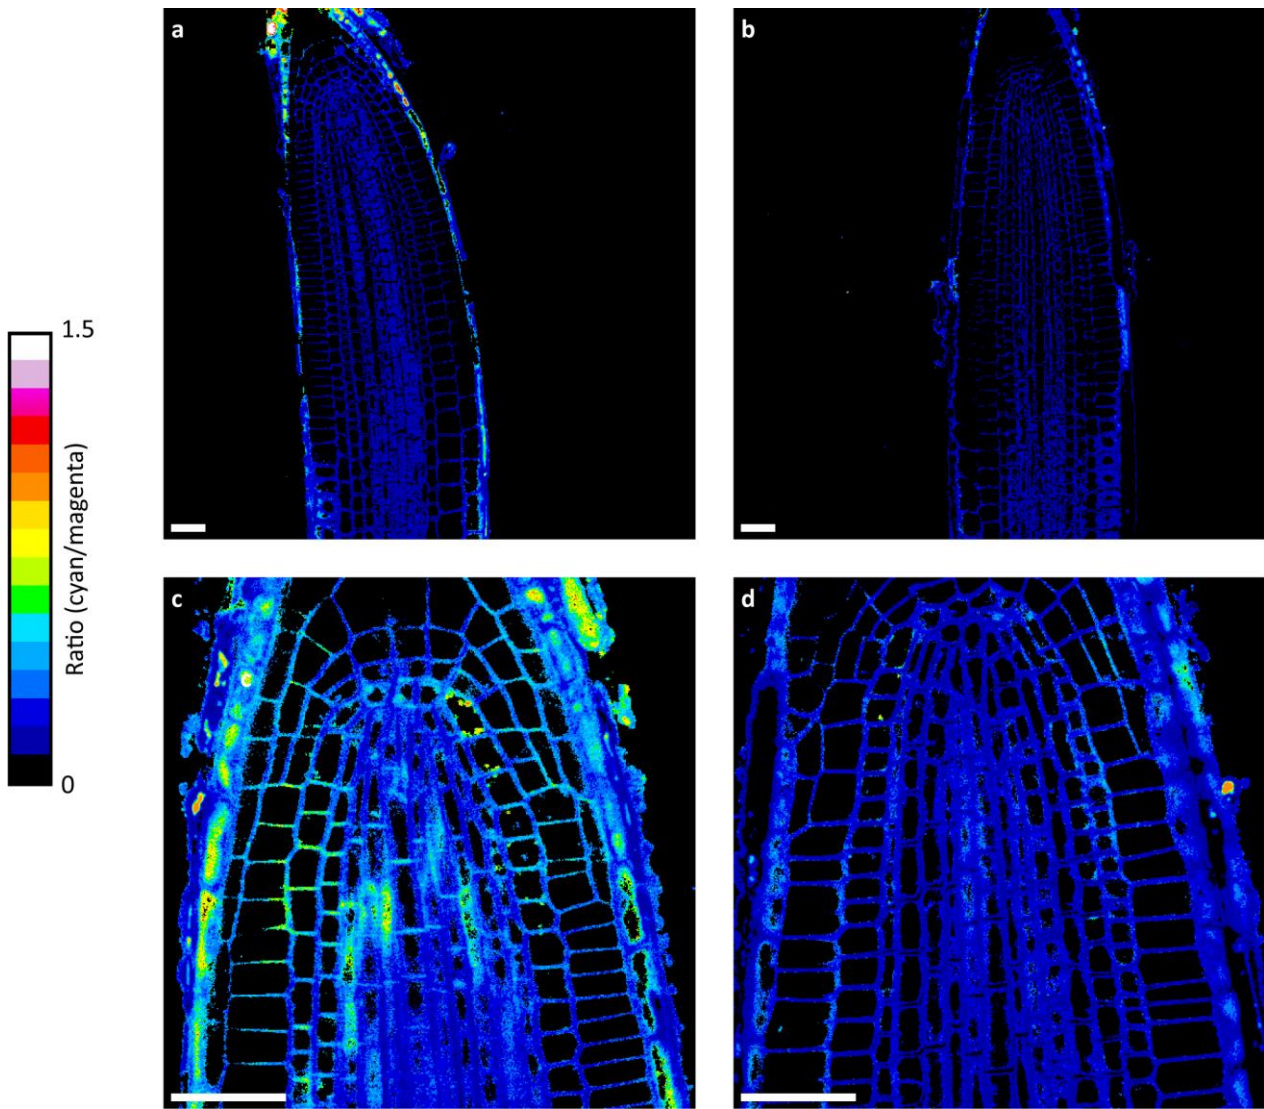

**Fig. S19.** Mock hemin treatment with LipoTag-Ox.

**a-d,** Ratiometric images of Arabidopsis root tips incubated for 1 hour with DMSO and ethanol (10  $\mu$ l DMSO and 8  $\mu$ l ethanol per 2 ml of 0.5x MS). Scale bars represent 25  $\mu$ m.

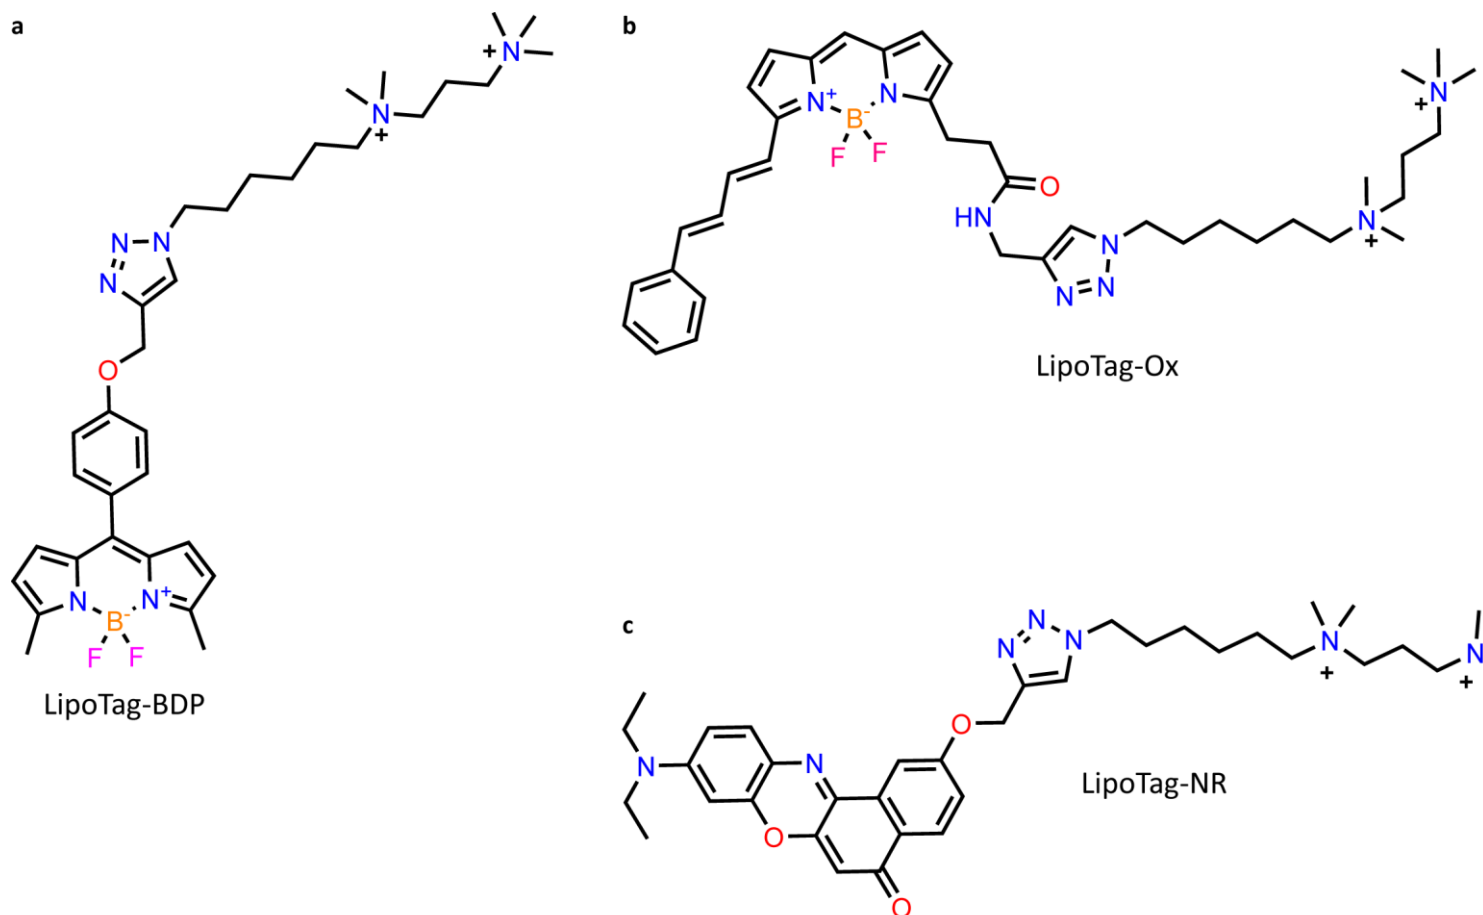

**Fig. S20.** Chemical structures of functional LipoTag probes.

Chemical structure of the membrane tension probe LipoTag-BDP (**a**), the membrane oxidation probe LipoTag-Ox (**b**) and the membrane order probe LipoTag-NR (**c**).

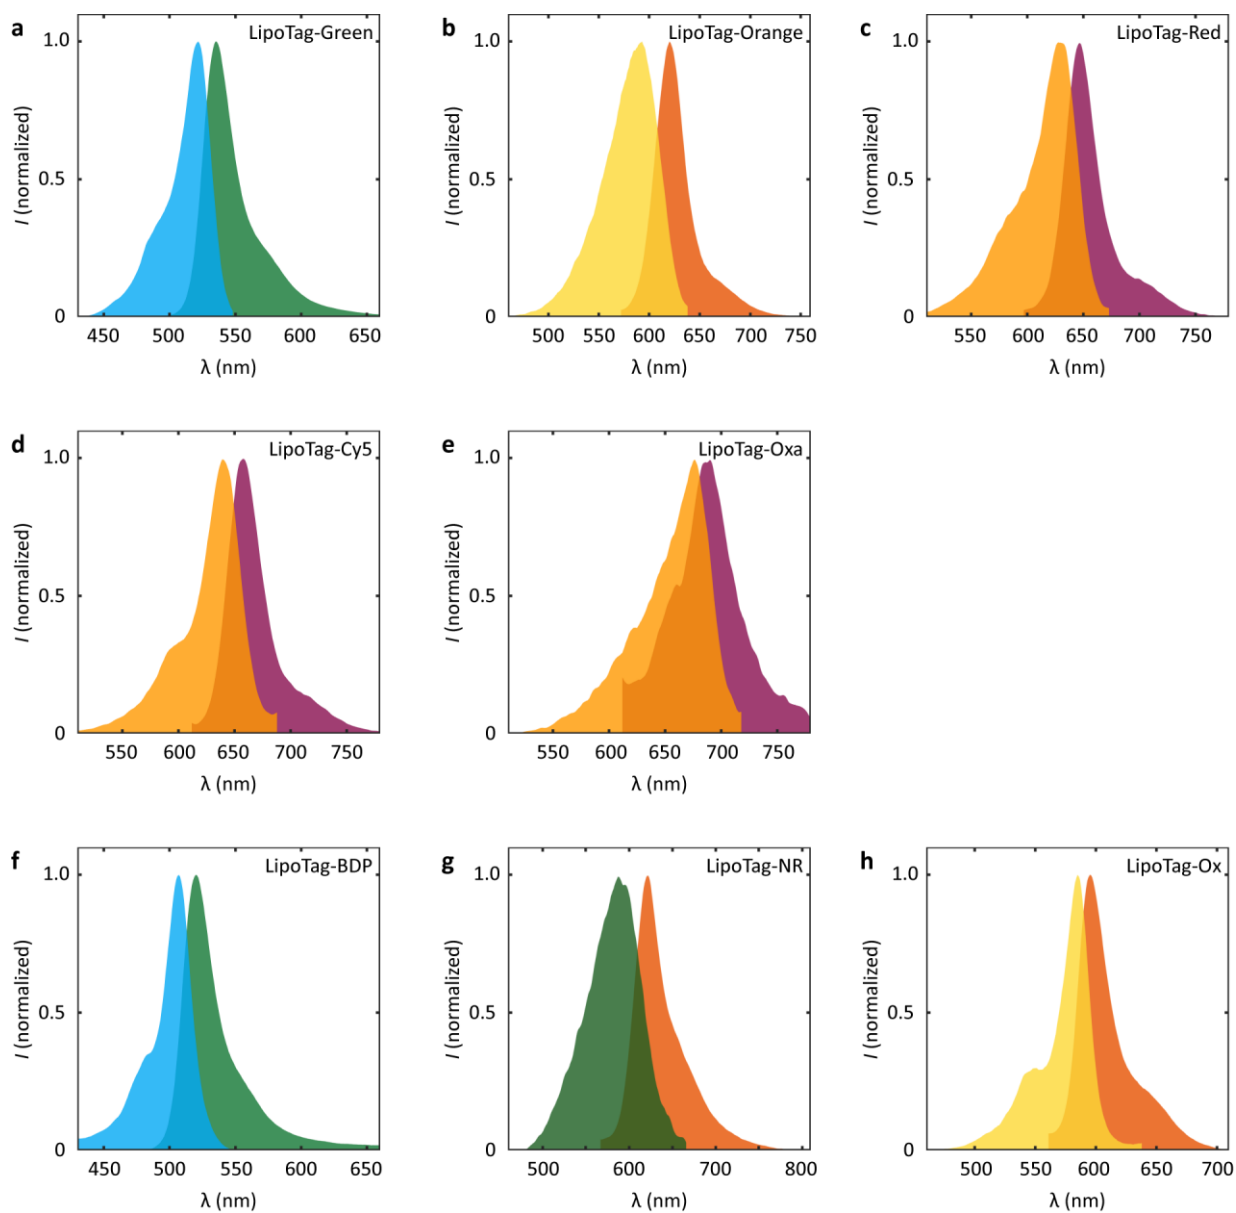

**Fig. S21.** Normalized fluorescence spectra of all LipoTag probes.

Normalized fluorescence excitation and emission spectra for LipoTag-Green (a), LipoTag-Orange (b), LipoTag-Red (c), LipoTag-Cy5 (d), LipoTag-Oxa (e), LipoTag-BDP (f), LipoTag-NR (g) and LipoTag-Ox (h).

## Number of samples and observations

**Table S1.** Number of samples, multiple cells and regions were often observed per sample

| Experiment                                           | Figures                                                                              | Sample numbers                                                                                                                                                                                                                                                  |
|------------------------------------------------------|--------------------------------------------------------------------------------------|-----------------------------------------------------------------------------------------------------------------------------------------------------------------------------------------------------------------------------------------------------------------|
| Arabidopsis root imaging (non-functional)            | Fig. 1b-d<br>Fig. 2a,b<br>Fig. S1a-t<br>Fig. S10a-f<br>Fig. S18a,b                   | LipoTag-Green n>20<br>LipoTag-Orange n>20<br>LipoTag-Red n>20<br>LipoTag-Cy5 n=2<br>LipoTag-Oxa n=2<br>FM1-43 n=2<br>DiD n=2<br>DiA n=2<br>BDP-green alkyne n=2<br>BDP-TR n=2<br>BDP630/650 n=2<br>BDP-rotor alkyne n=2                                         |
| Non-Arabidopsis imaging (non-funtional)              | Fig. 2d-o<br>Fig. S11a-f<br>Fig. S12a-k<br>Fig. S13a-g<br>Fig. S14a-f<br>Fig. S15a-f | <i>C. richardii</i> n=2<br><i>M. polymorpha</i> n=4<br><i>S.rigidula</i> n=4<br><i>Ectocarpus sp</i> n=5<br><i>F. serratus</i> n=3<br><i>S. latissimi</i> n=3<br><i>S. Pombe</i> n=4<br><i>V. dahliae</i> n=6<br><i>E. coli</i> n>10<br><i>M. musculus</i> n>10 |
| Multicolor imaging                                   | Fig 2p,q                                                                             | n=6                                                                                                                                                                                                                                                             |
| FRAP                                                 | Fig. 1e                                                                              | LipoTag-Green n=14<br>LipoTag-Orange n=20<br>LipoTag-Red n=19<br>FM4-64 n=16                                                                                                                                                                                    |
| Toxicity assay                                       | Fig. 1f                                                                              | n>5 wells with >10 protoplasts per well                                                                                                                                                                                                                         |
| ABA treatment stomata LipoTag-BDP FLIM               | Fig. 3c-e                                                                            | Open (non-treated) n=19<br>Closed (treated) n=20                                                                                                                                                                                                                |
| Ablation LipoTag-BDP FLIM                            | Fig. 3f-h                                                                            | n=9                                                                                                                                                                                                                                                             |
| Sterol depletion M $\beta$ CD LipoTag-NR ratiometric | Fig. 4c-e                                                                            | Control n=6<br>Treated n=8                                                                                                                                                                                                                                      |
| Ablation LipoTag-NR ratiometric                      | Fig. 4f-h                                                                            | n=6                                                                                                                                                                                                                                                             |
| Hemin treatment LipoTag-Ox ratiometric               | Fig. 5c-e<br>Fig. S19a-d                                                             | Treated n=6 per timepoint<br>Mock treatment n=4                                                                                                                                                                                                                 |
| Ablation LipoTag-Ox                                  | Fig. 5f-h                                                                            | Ablation n=9<br>Mock n=3                                                                                                                                                                                                                                        |
| Tissue penetration                                   | Fig. S3a-t<br>Fig. S5a-j<br>Fig. S6a-j<br>Fig. S7a-j                                 | LipoTag-Green n=3<br>LipoTag-Orange n=3<br>LipoTag-Red n=3<br>FM4-64 n=3                                                                                                                                                                                        |
| Concentration range                                  | Fig. S2a-p<br>Fig. S4a-r                                                             | LipoTag-Green n=3<br>LipoTag-Orange n=3<br>LipoTag-Red n=3<br>FM4-64 n=3                                                                                                                                                                                        |

|                                         |             |                                                                          |
|-----------------------------------------|-------------|--------------------------------------------------------------------------|
| Plasmolysis                             | Fig. S9a-i  | LipoTag-Green n=4<br>LipoTag-Orange n=6<br>LipoTag-Red n=5<br>FM4-64 n=4 |
| Marchantia gemma plasmodesmata staining | Fig. S16a-c | Aniline blue n = 3<br>Aniline blue + LT-Red n = 3<br>LT-Red = 3          |
| LipoTag-BDP calibration FLIM            | Fig. S17    | n=5 per point                                                            |

## NMR spectra

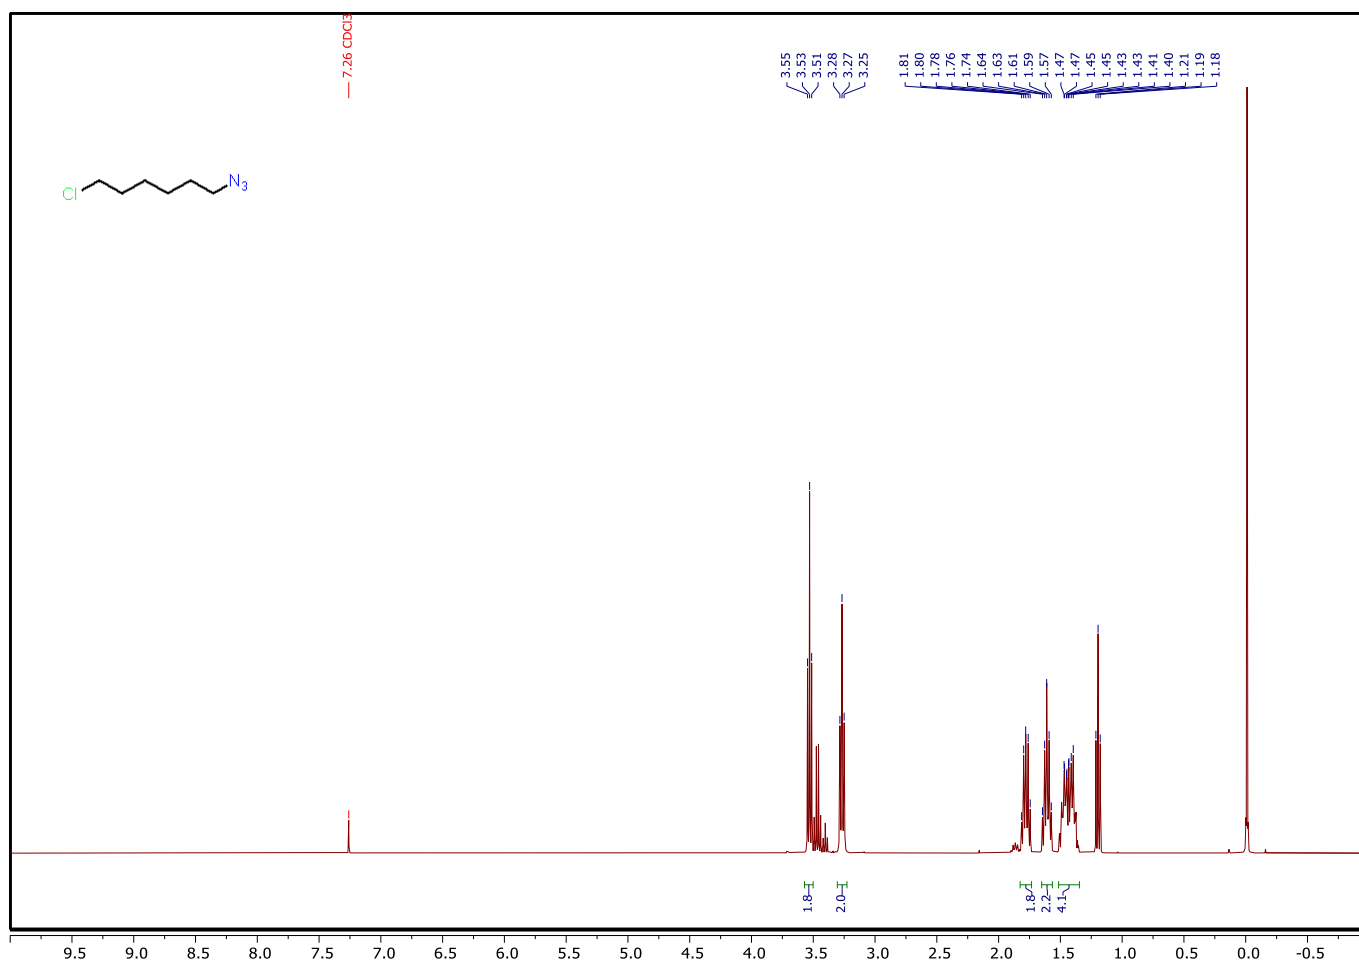

**Fig. S22.** <sup>1</sup>H spectrum of **1**.

<sup>1</sup>H NMR (400 MHz, CDCl<sub>3</sub>) δ 3.53 (t, *J* = 6.6 Hz, 2H), 3.27 (t, *J* = 6.9 Hz, 2H), 1.83 – 1.73 (m, 2H), 1.65 – 1.56 (m, 2H), 1.51 – 1.35 (m, 4H).

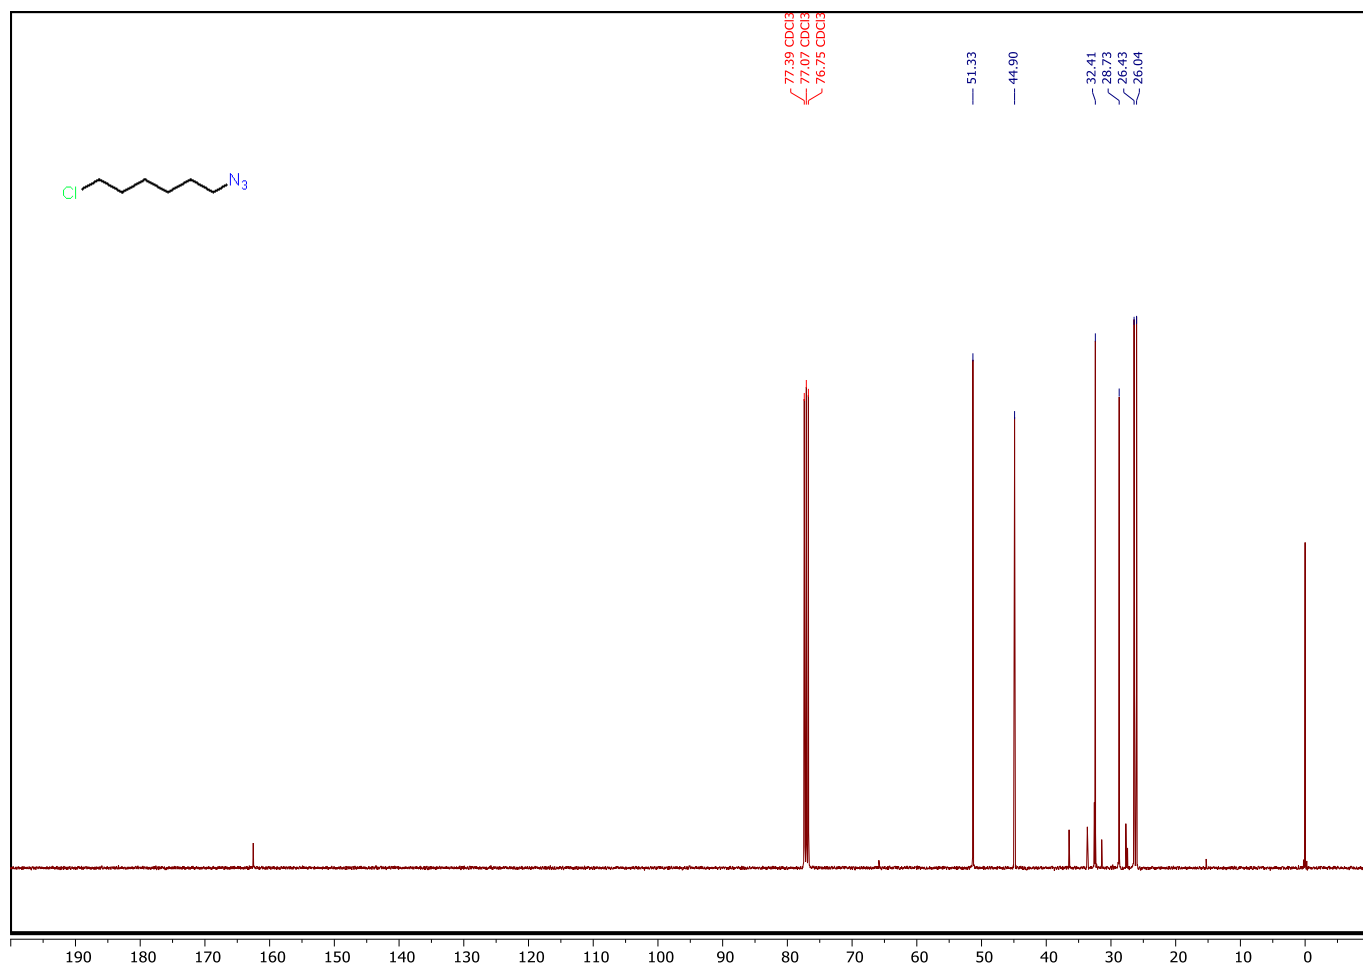

**Fig. S23.**  $^{13}\text{C}$  spectrum of **1**.

$^{13}\text{C}$  NMR (101 MHz,  $\text{CDCl}_3$ )  $\delta$  51.33, 44.90, 32.41, 28.73, 26.43, 26.04.

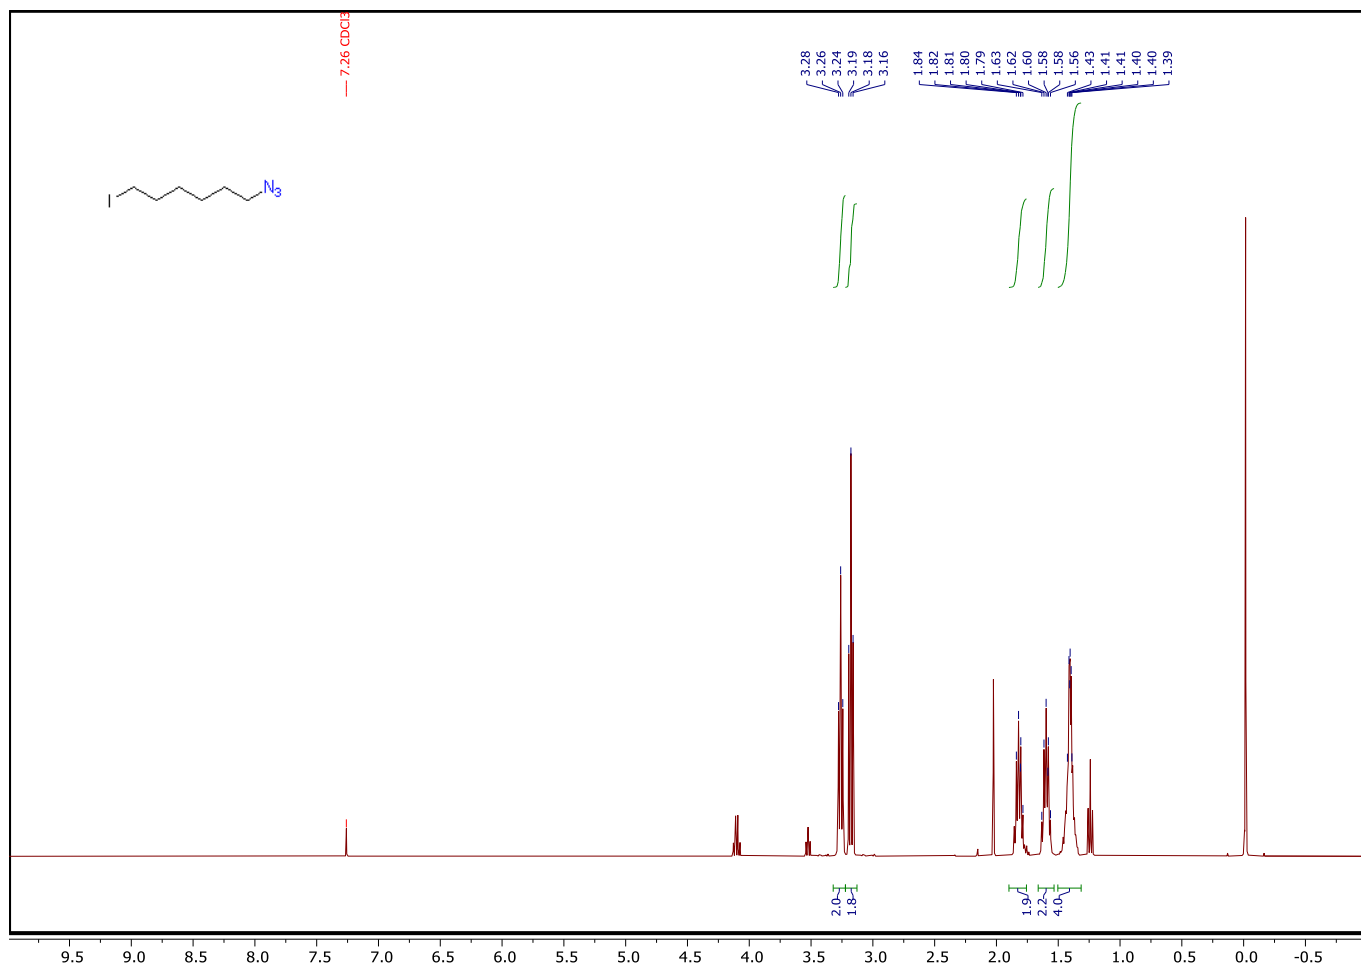

**Fig. S24.**  $^1\text{H}$  spectrum of **2**.

$^1\text{H}$  NMR (400 MHz,  $\text{CDCl}_3$ )  $\delta$  3.26 (t,  $J = 6.9$  Hz, 2H), 3.18 (t,  $J = 6.9$  Hz, 2H), 1.88 – 1.72 (m, 2H), 1.66 – 1.53 (m, 2H), 1.51 – 1.32 (m, 4H).

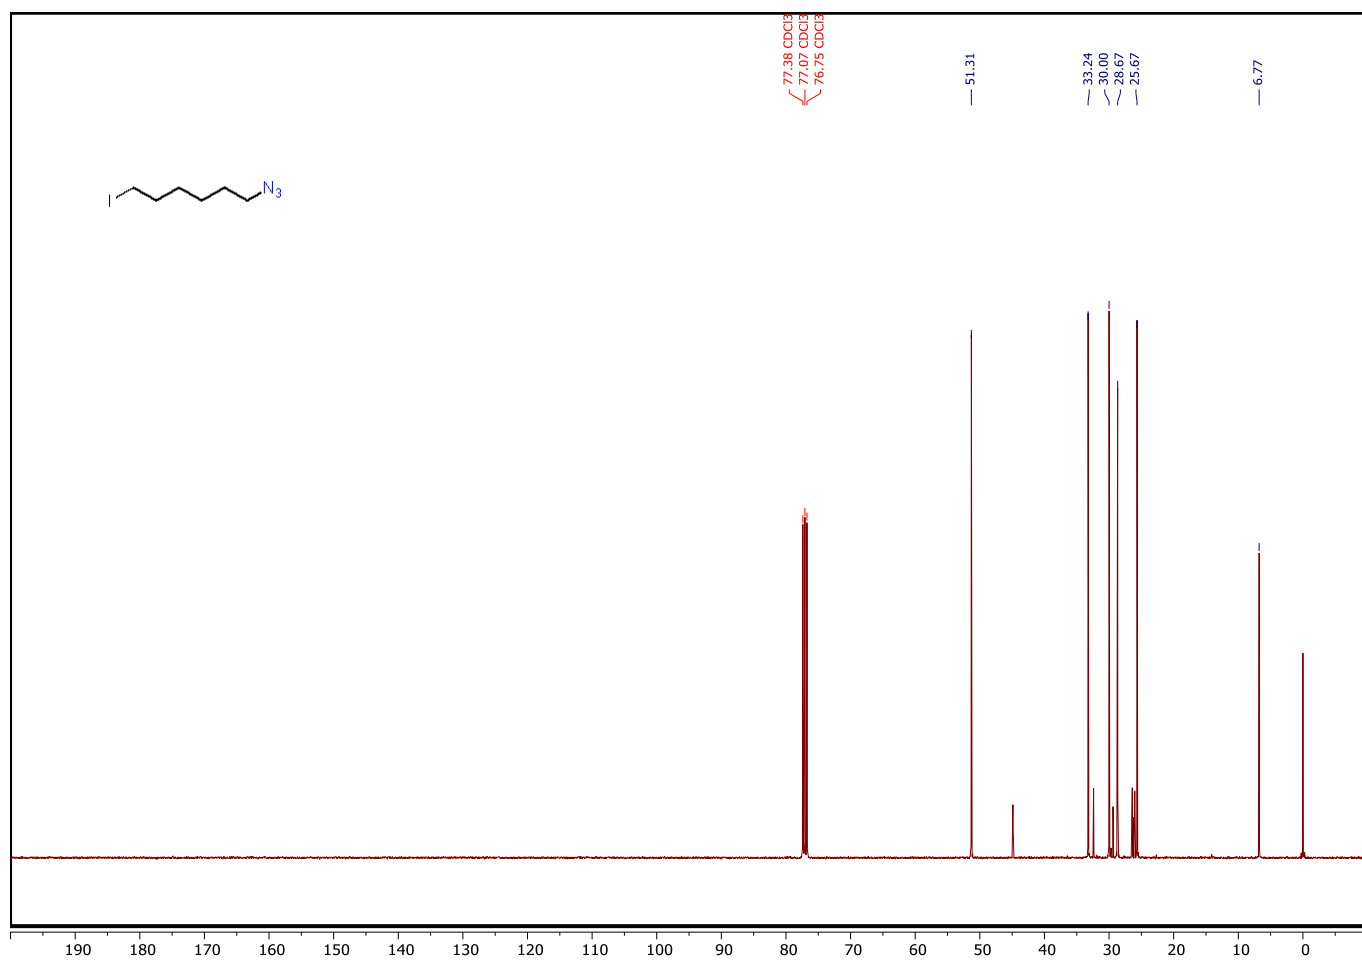

**Fig. S25.**  $^{13}\text{C}$  spectrum of **2**.

$^{13}\text{C}$  NMR (101 MHz,  $\text{CDCl}_3$ )  $\delta$  51.31, 33.24, 30.00, 28.67, 25.67, 6.77.

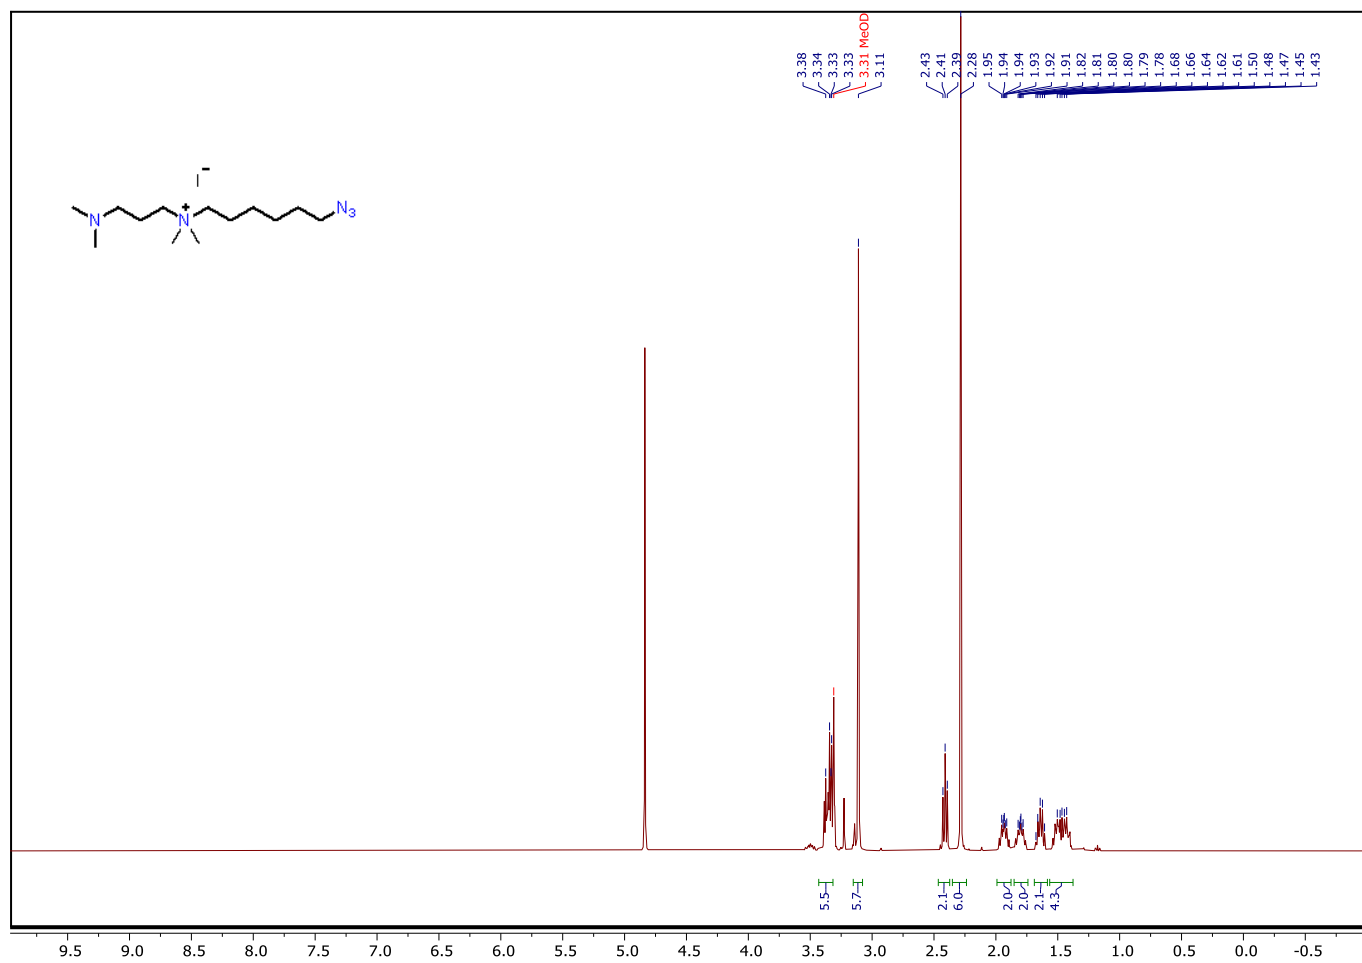

**Fig. S26.** <sup>1</sup>H spectrum of **3**.

<sup>1</sup>H NMR (400 MHz, MeOD)  $\delta$  3.43 – 3.32 (m, 6H), 3.11 (s, 6H), 2.41 (t,  $J = 7.1$  Hz, 2H), 2.28 (s, 6H), 1.99 – 1.88 (m, 2H), 1.85 – 1.74 (m, 2H), 1.69 – 1.58 (m, 2H), 1.57 – 1.38 (m, 4H).

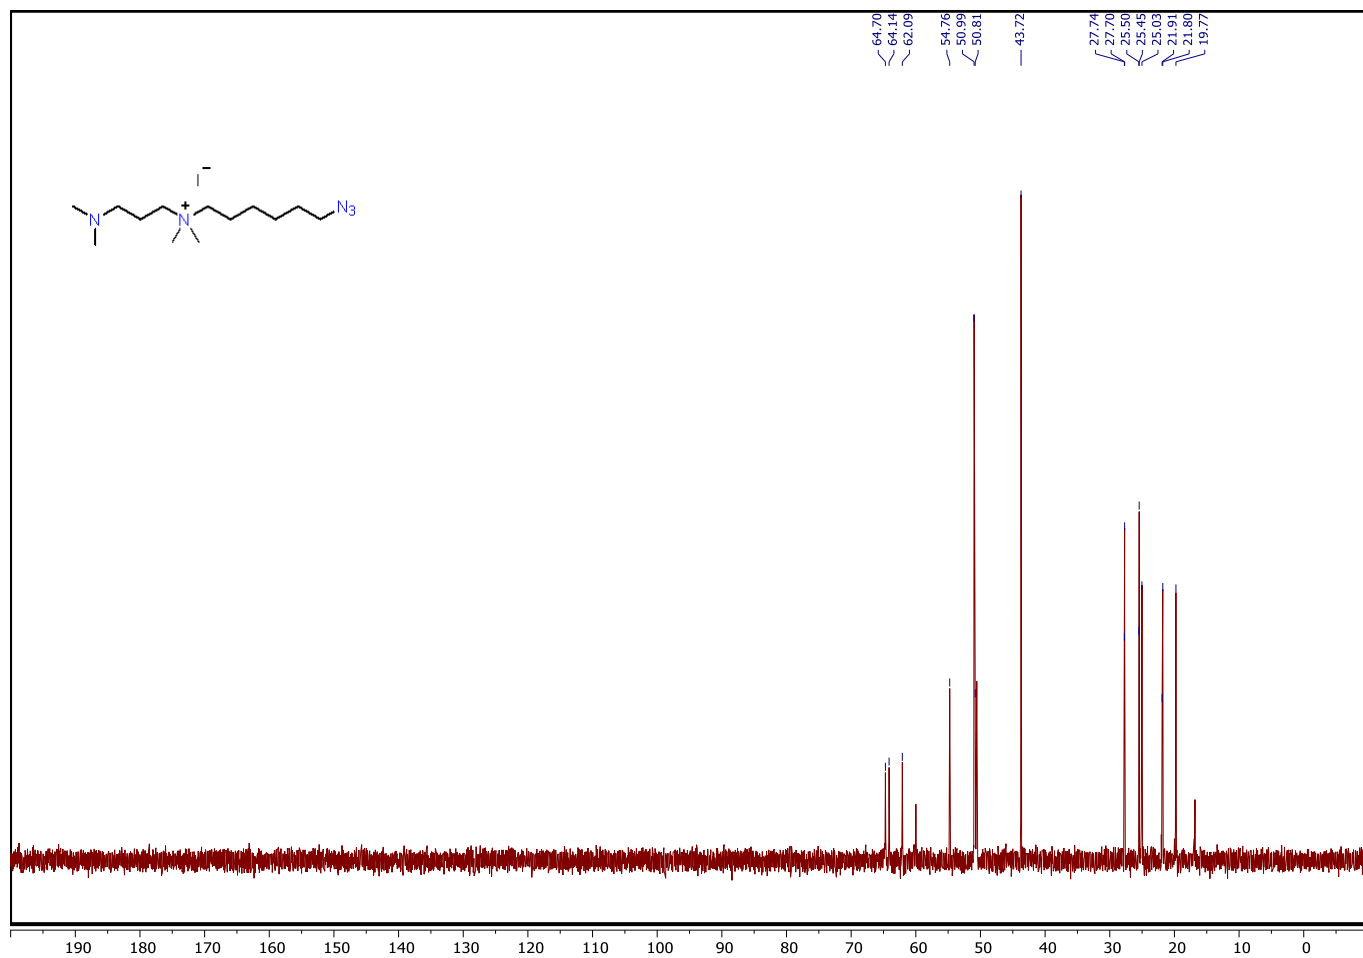

**Fig. S27.**  $^{13}\text{C}$  spectrum of **3**.

$^{13}\text{C}$  NMR (101 MHz,  $\text{D}_2\text{O}$ )  $\delta$  64.70, 64.14, 62.09, 54.76, 50.99, 50.81, 43.72, 27.74, 27.70, 25.50, 25.45, 25.03, 21.91, 21.80, 19.77.

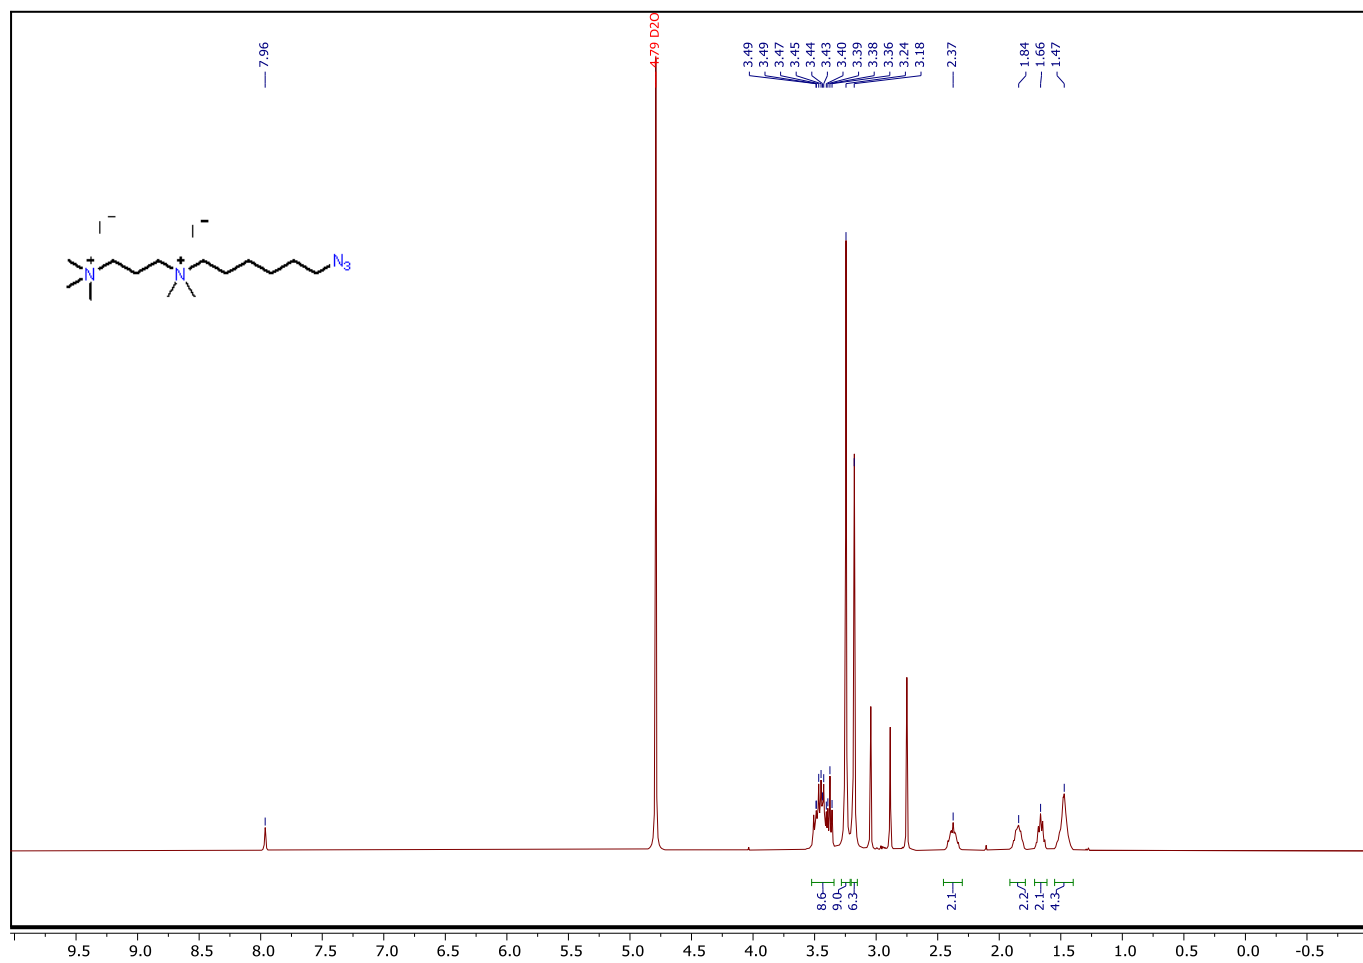

**Fig. S28.** <sup>1</sup>H spectrum of **4**.

<sup>1</sup>H NMR (400 MHz, D<sub>2</sub>O) δ 3.52 – 3.34 (m, 9H), 3.24 (s, 9H), 3.18 (s, 6H), 2.37 (s, 2H), 1.84 (s, 2H), 1.66 (s, 2H), 1.47 (s, 4H).

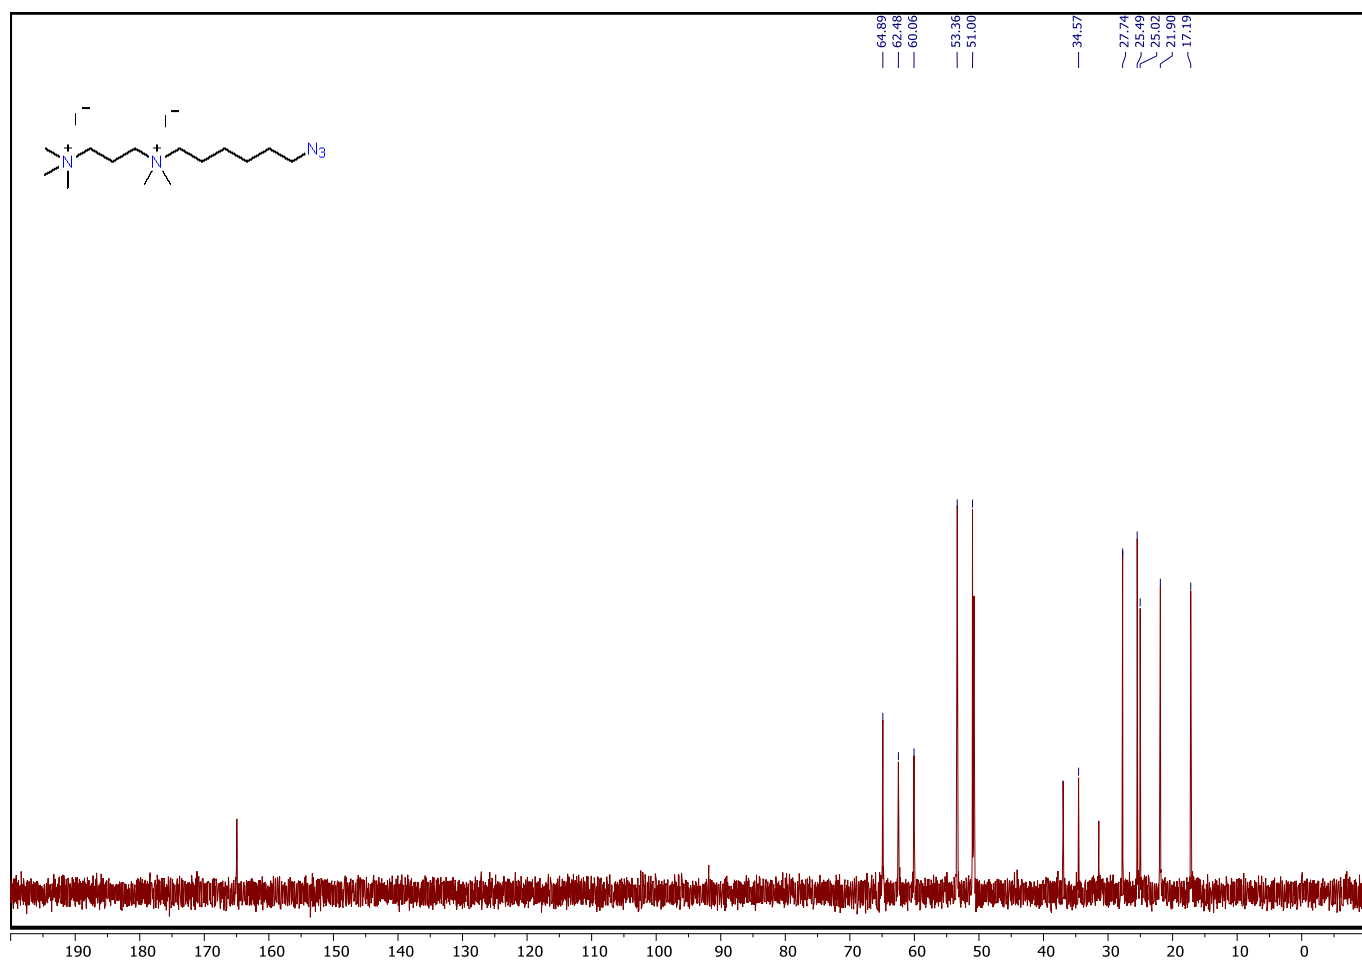

**Fig. S29.**  $^{13}\text{C}$  spectrum of 4.

$^{13}\text{C}$  NMR (101 MHz,  $\text{D}_2\text{O}$ )  $\delta$  64.89, 62.48, 60.06, 53.36, 51.00, 34.57, 27.74, 25.49, 25.02, 21.90, 17.19.

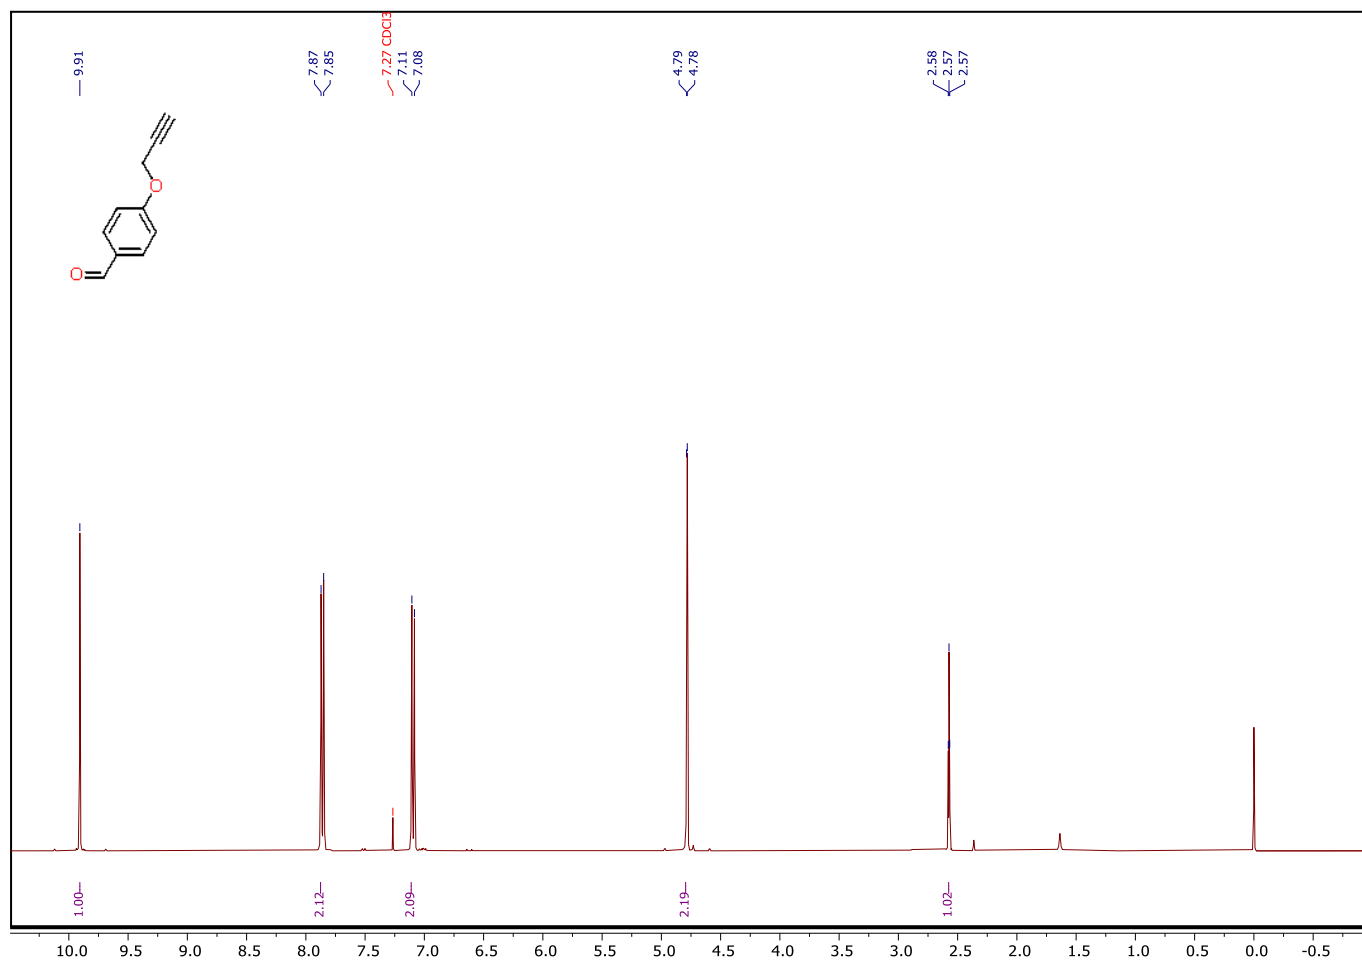

**Fig. S30.**  $^1\text{H}$  spectrum of **5**.

$^1\text{H}$  NMR (400 MHz,  $\text{CDCl}_3$ )  $\delta$  9.91 (s, 1H), 7.86 (d,  $J = 8.8$  Hz, 2H), 7.09 (d,  $J = 8.8$  Hz, 2H), 4.78 (d,  $J = 2.4$  Hz, 2H), 2.57 (t,  $J = 2.4$  Hz, 1H).

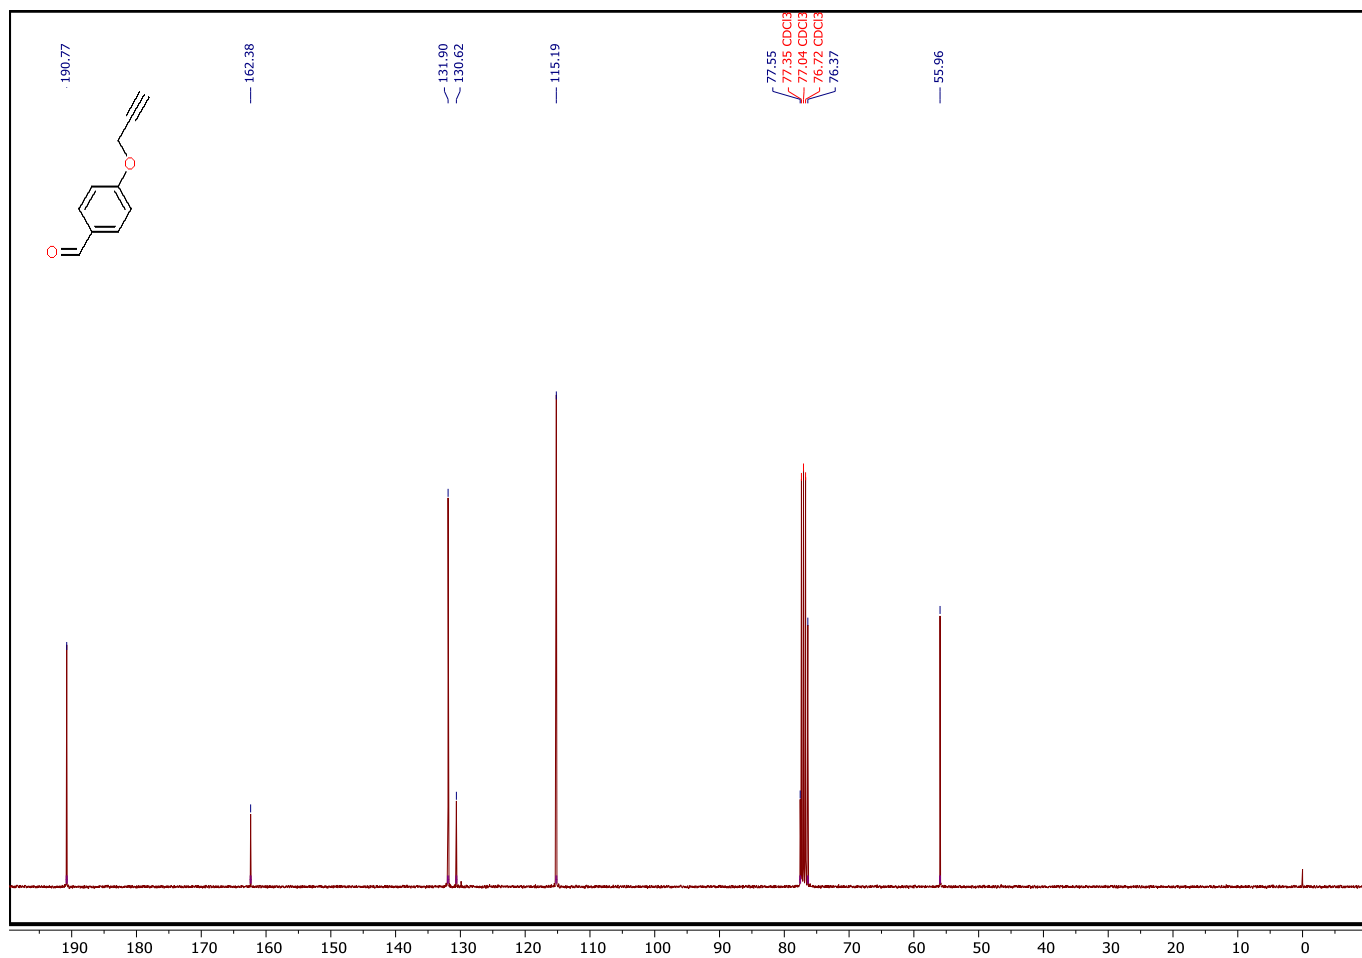

**Fig. S31.**  $^{13}\text{C}$  spectrum of **5**.

$^{13}\text{C}$  NMR (101 MHz,  $\text{CDCl}_3$ )  $\delta$  190.77, 162.38, 131.90, 130.62, 115.19, 77.55, 76.37, 55.96.

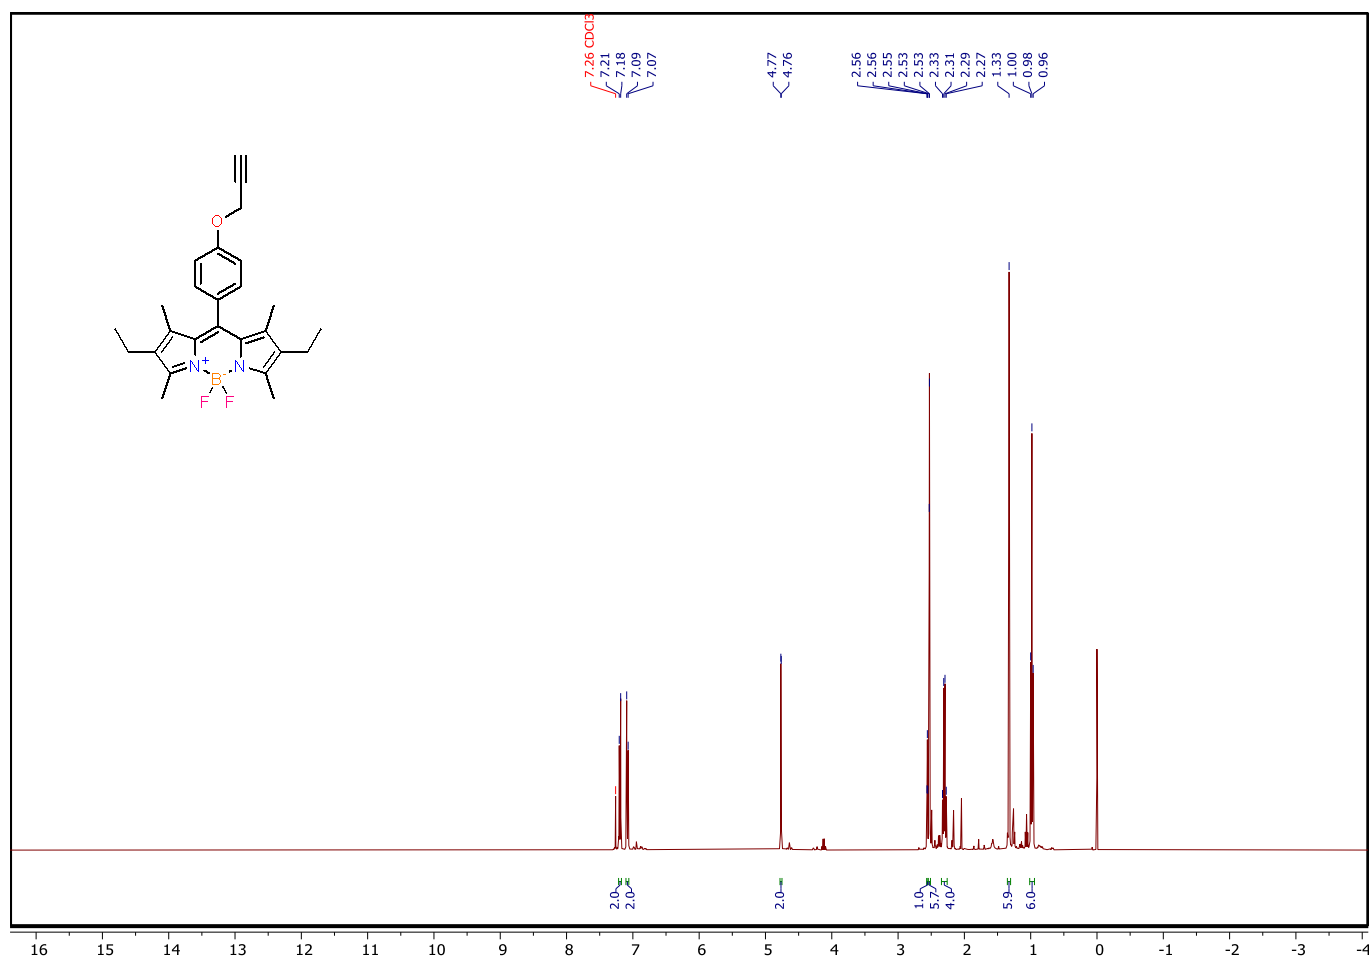

**Fig. S32.**  $^1\text{H}$  spectrum of **6**.

$^1\text{H}$  NMR (400 MHz,  $\text{CDCl}_3$ )  $\delta$  7.19 (d,  $J$  = 8.6 Hz, 2H), 7.08 (d,  $J$  = 8.7 Hz, 2H), 4.77 (d,  $J$  = 2.4 Hz, 2H), 2.56 (t,  $J$  = 2.4 Hz, 1H), 2.53 (d,  $J$  = 1.3 Hz, 6H), 2.30 (q,  $J$  = 7.5 Hz, 4H), 1.33 (s, 6H), 0.98 (t,  $J$  = 7.5 Hz, 6H).

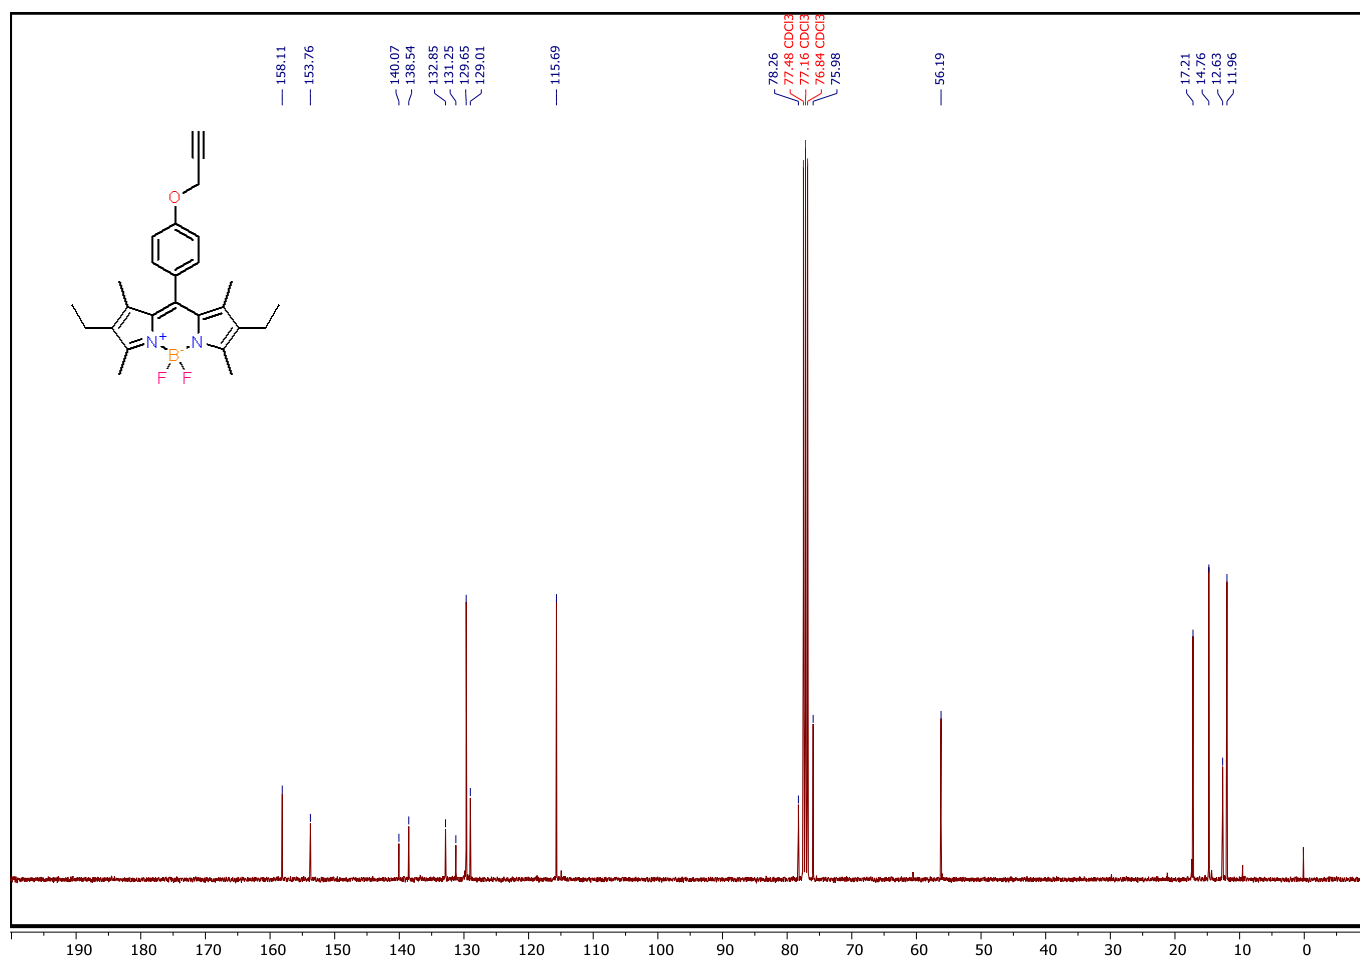

**Fig. S33.**  $^{13}\text{C}$  spectrum of **6**.

$^{13}\text{C}$  NMR (101 MHz,  $\text{CDCl}_3$ )  $\delta$  158.11, 153.76, 140.07, 138.54, 132.85, 131.25, 129.65, 129.01, 115.69, 78.26, 75.98, 56.19, 17.21, 14.76, 12.63, 11.96.

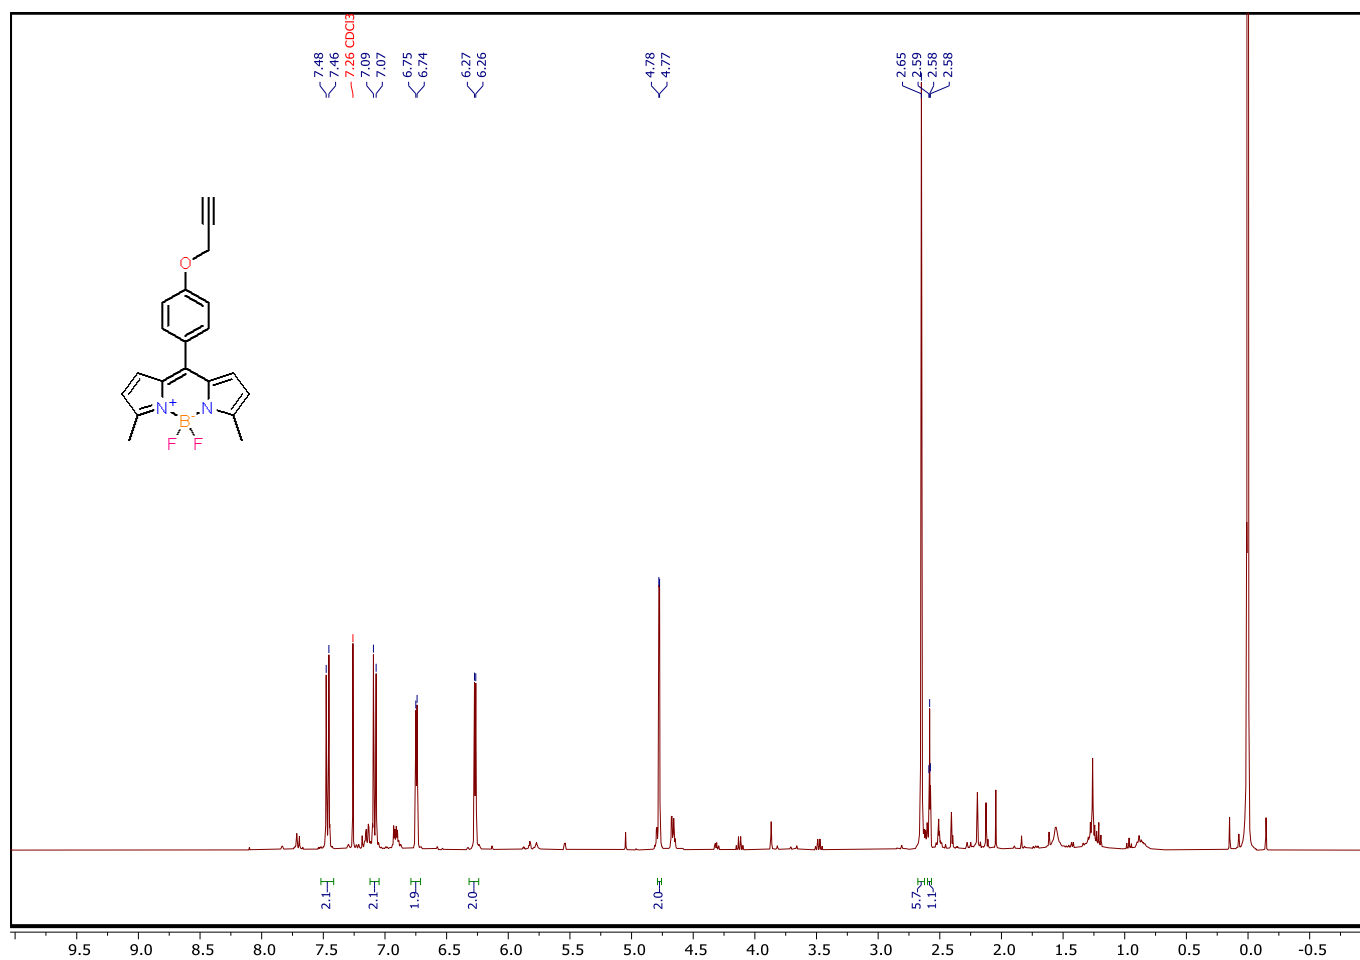

**Fig. S34.**  $^1\text{H}$  spectrum of 7.

$^1\text{H}$  NMR (400 MHz,  $\text{CDCl}_3$ )  $\delta$  7.47 (d,  $J = 8.7$  Hz, 2H), 7.08 (d,  $J = 8.7$  Hz, 2H), 6.74 (d,  $J = 4.1$  Hz, 2H), 6.27 (d,  $J = 4.2$  Hz, 2H), 4.78 (d,  $J = 2.4$  Hz, 2H), 2.65 (s, 6H), 2.58 (t,  $J = 2.4$  Hz, 1H).

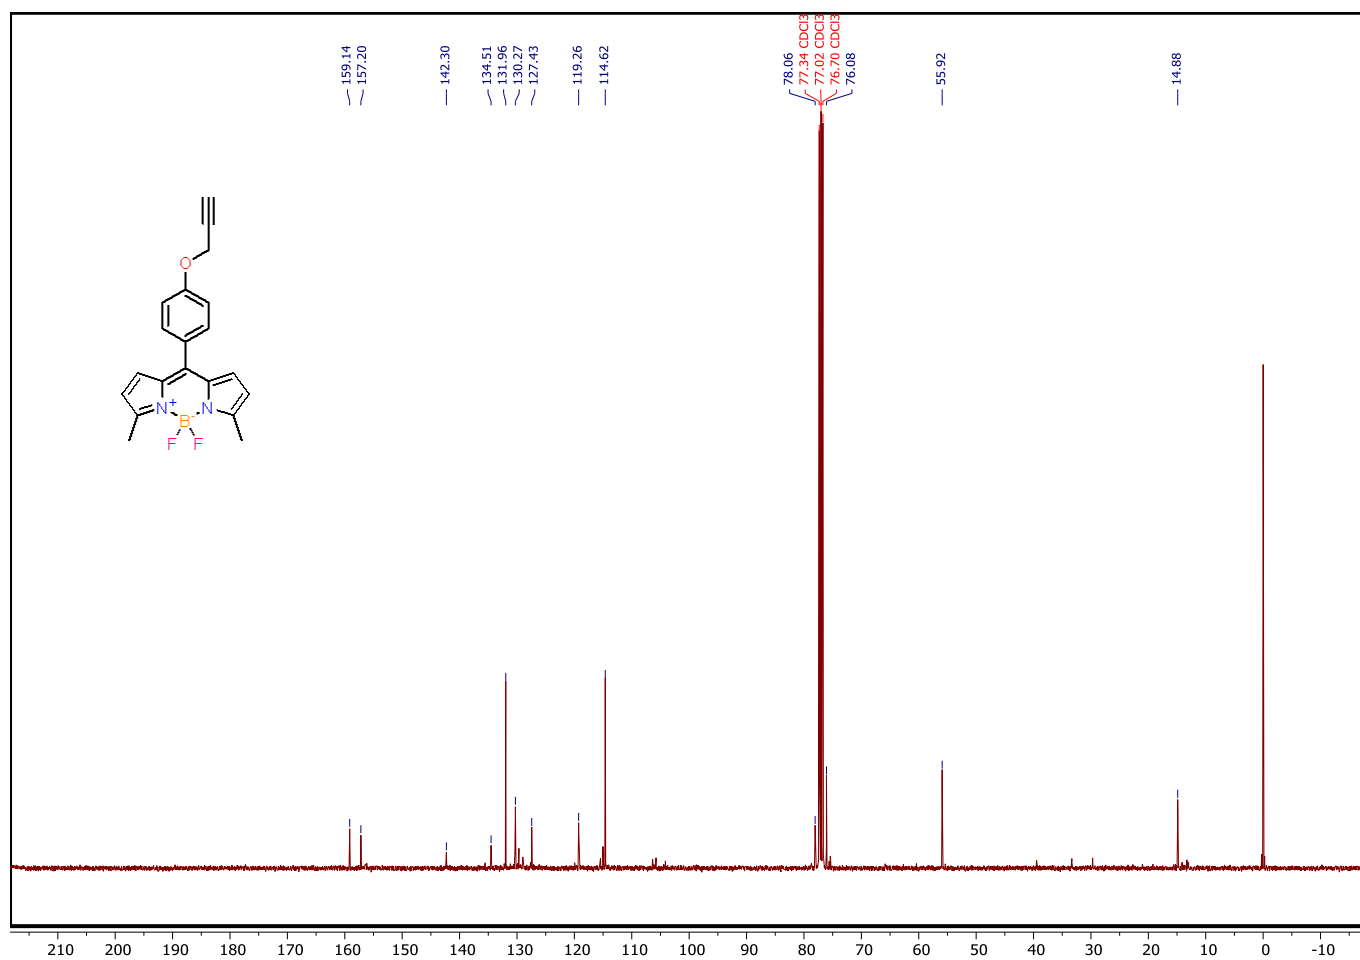

**Fig. S35.**  $^{13}\text{C}$  spectrum of **7**.

$^{13}\text{C}$  NMR (101 MHz,  $\text{CDCl}_3$ )  $\delta$  159.14, 157.20, 142.30, 134.51, 131.96, 130.27, 127.43, 119.26, 114.62, 78.06, 76.08, 55.92, 14.88.

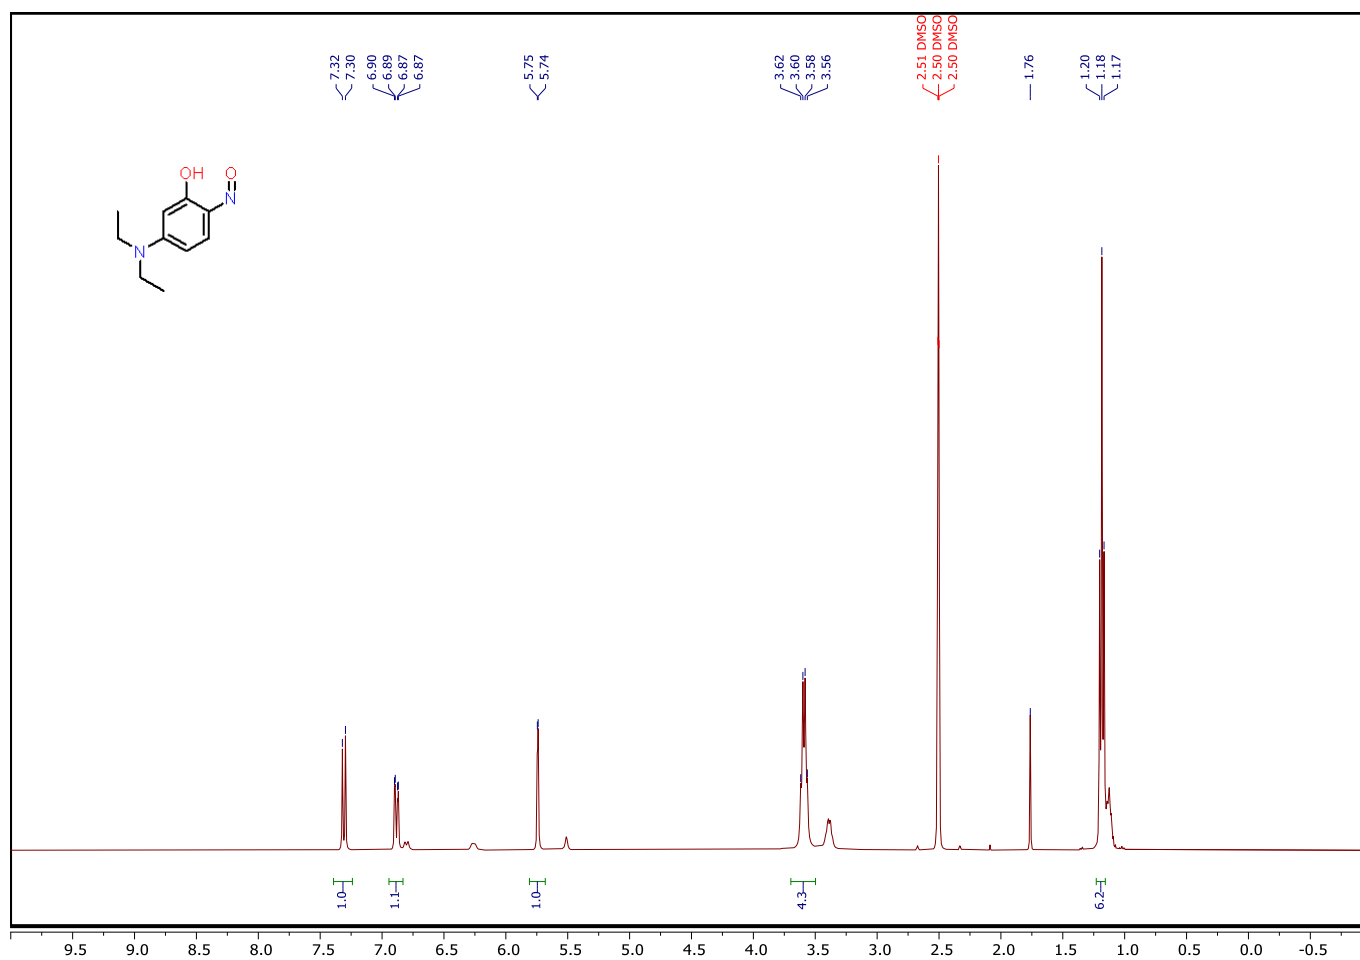

**Fig. S36.** <sup>1</sup>H spectrum of **8**.

<sup>1</sup>H NMR (400 MHz, DMSO)  $\delta$  7.31 (d,  $J$  = 9.9 Hz, 1H), 6.88 (dd,  $J$  = 10.0, 2.6 Hz, 1H), 5.74 (d,  $J$  = 2.6 Hz, 1H), 3.59 (q,  $J$  = 7.1 Hz, 4H), 1.18 (t,  $J$  = 7.1 Hz, 6H).

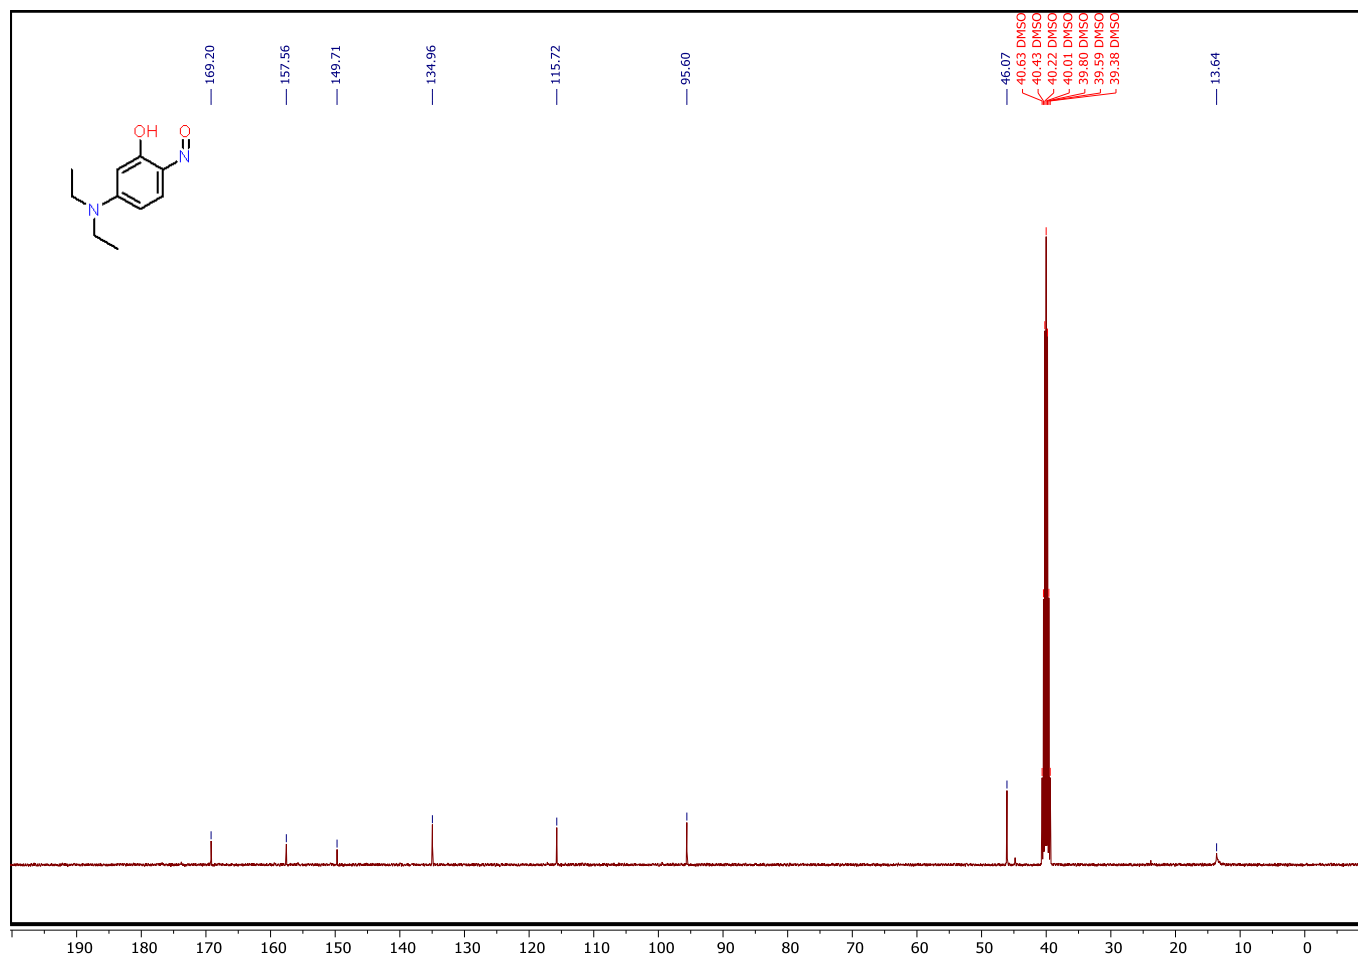

**Fig. S37.**  $^{13}\text{C}$  spectrum of **8**.

$^{13}\text{C}$  NMR (101 MHz, DMSO)  $\delta$  169.20, 157.56, 149.71, 134.96, 115.72, 95.60, 46.07, 13.64.

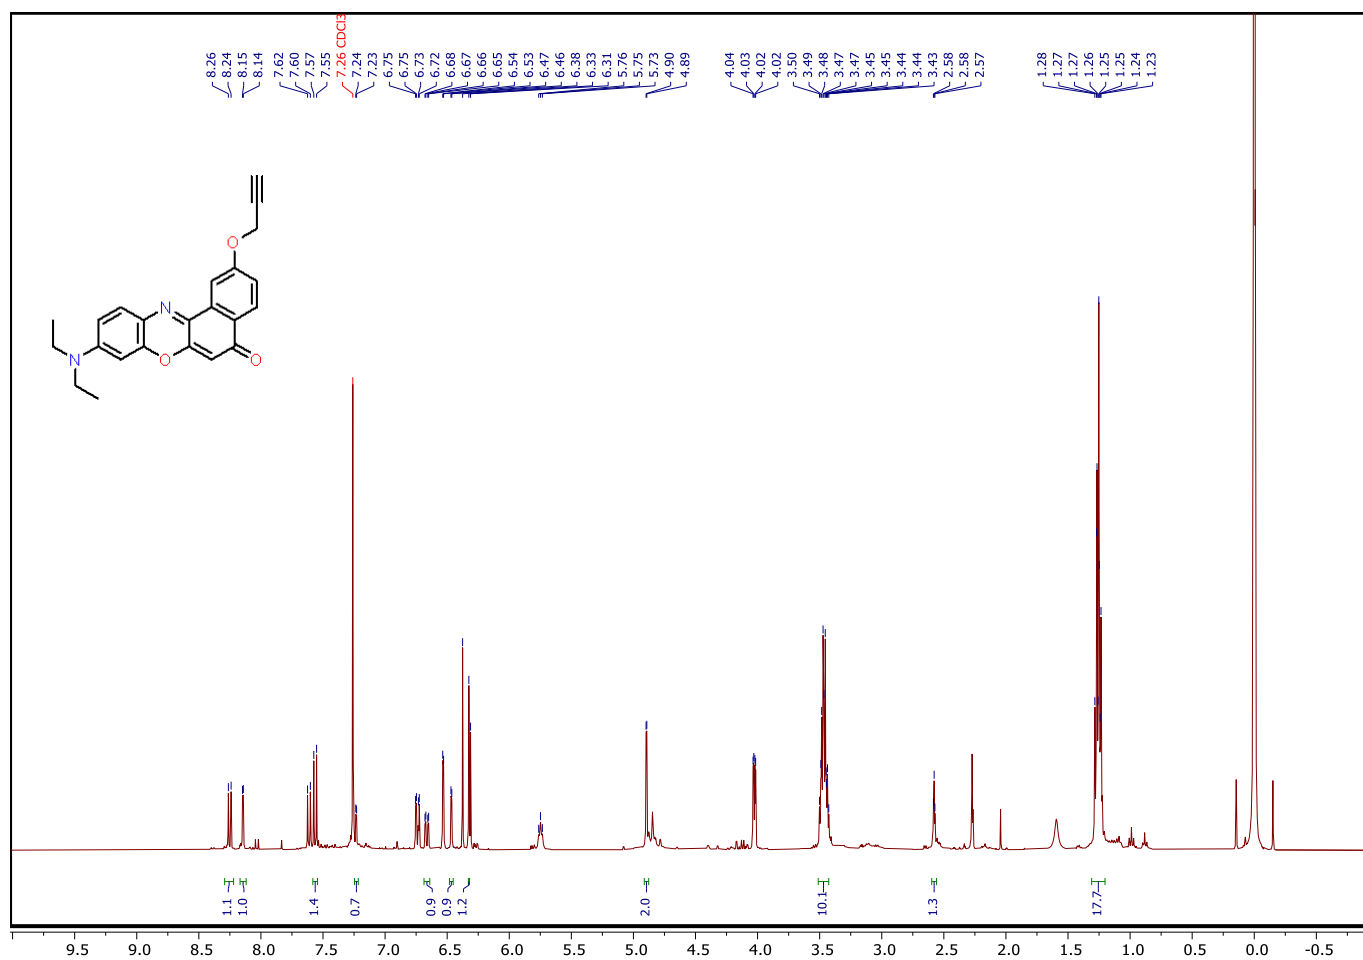

**Fig. S38.** <sup>1</sup>H spectrum of **9**.

<sup>1</sup>H NMR (400 MHz, CDCl<sub>3</sub>) δ 8.25 (d, *J* = 8.8 Hz, 1H), 8.14 (d, *J* = 2.6 Hz, 1H), 7.56 (d, *J* = 9.1 Hz, 1H), 7.23 (d, *J* = 2.6 Hz, 1H), 6.66 (dd, *J* = 9.0, 2.7 Hz, 1H), 6.47 (d, *J* = 2.7 Hz, 1H), 6.33 (s, 1H), 4.90 (d, *J* = 2.4 Hz, 2H), 3.47 (qd, *J* = 7.1, 4.3 Hz, 10H), 2.58 (t, *J* = 2.4 Hz, 1H), 1.26 (td, *J* = 7.1, 5.7 Hz, 18H)

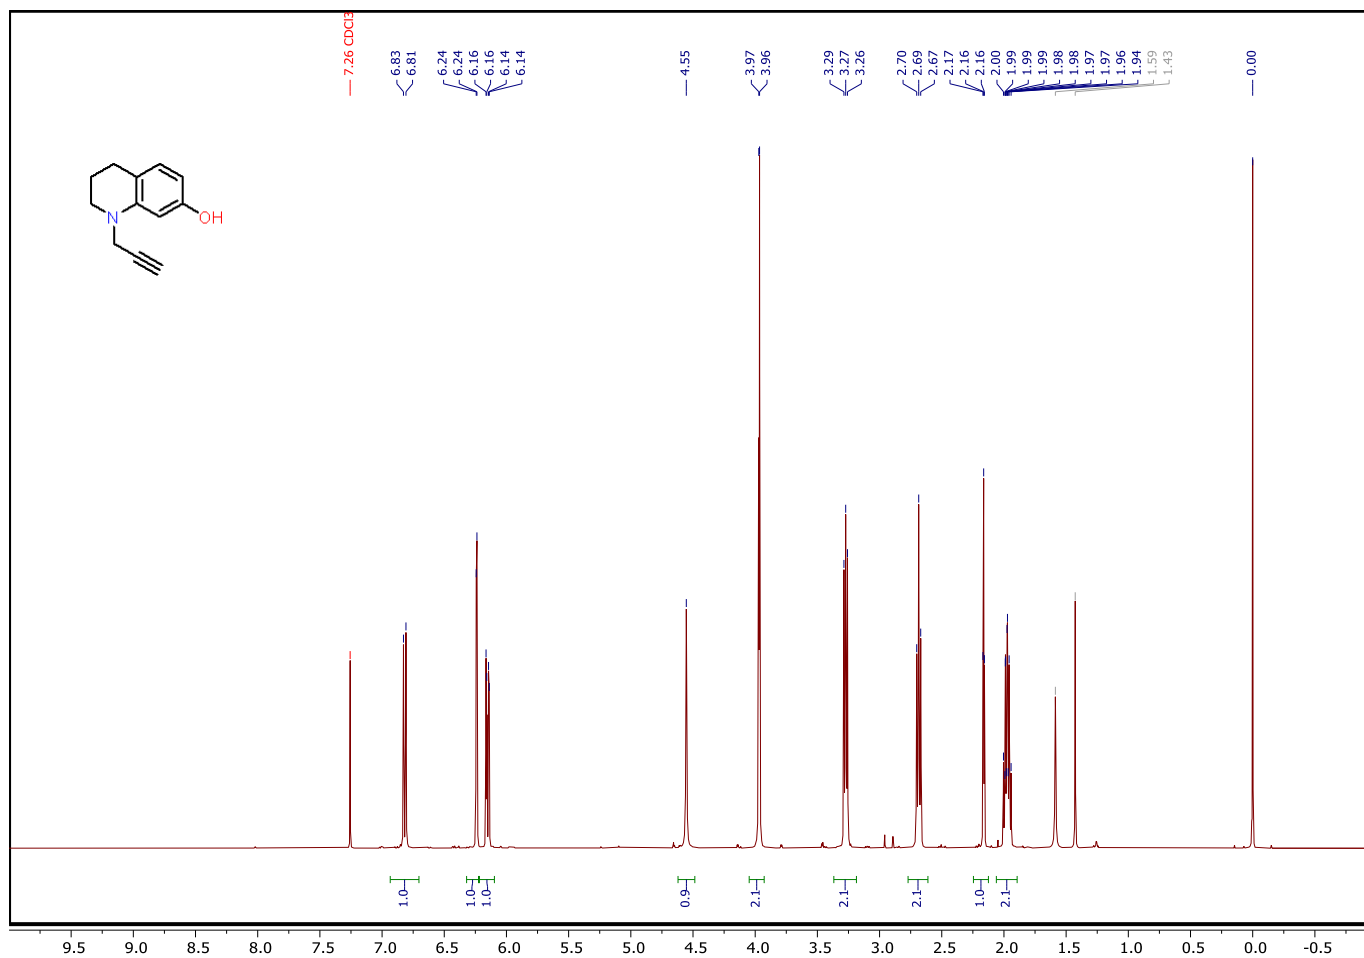

**Fig. S41.** <sup>1</sup>H spectrum of **10**.

<sup>1</sup>H NMR (400 MHz, CDCl<sub>3</sub>) δ 6.82 (d, J = 8.0 Hz, 1H), 6.24 (d, J = 2.4 Hz, 1H), 6.15 (dd, J = 8.0, 2.4 Hz, 1H), 4.55 (s, 1H), 3.97 (d, J = 2.4 Hz, 2H), 3.34 – 3.18 (m, 2H), 2.69 (t, J = 6.5 Hz, 2H), 2.16 (t, J = 2.4 Hz, 1H), 2.02 – 1.93 (m, 2H).

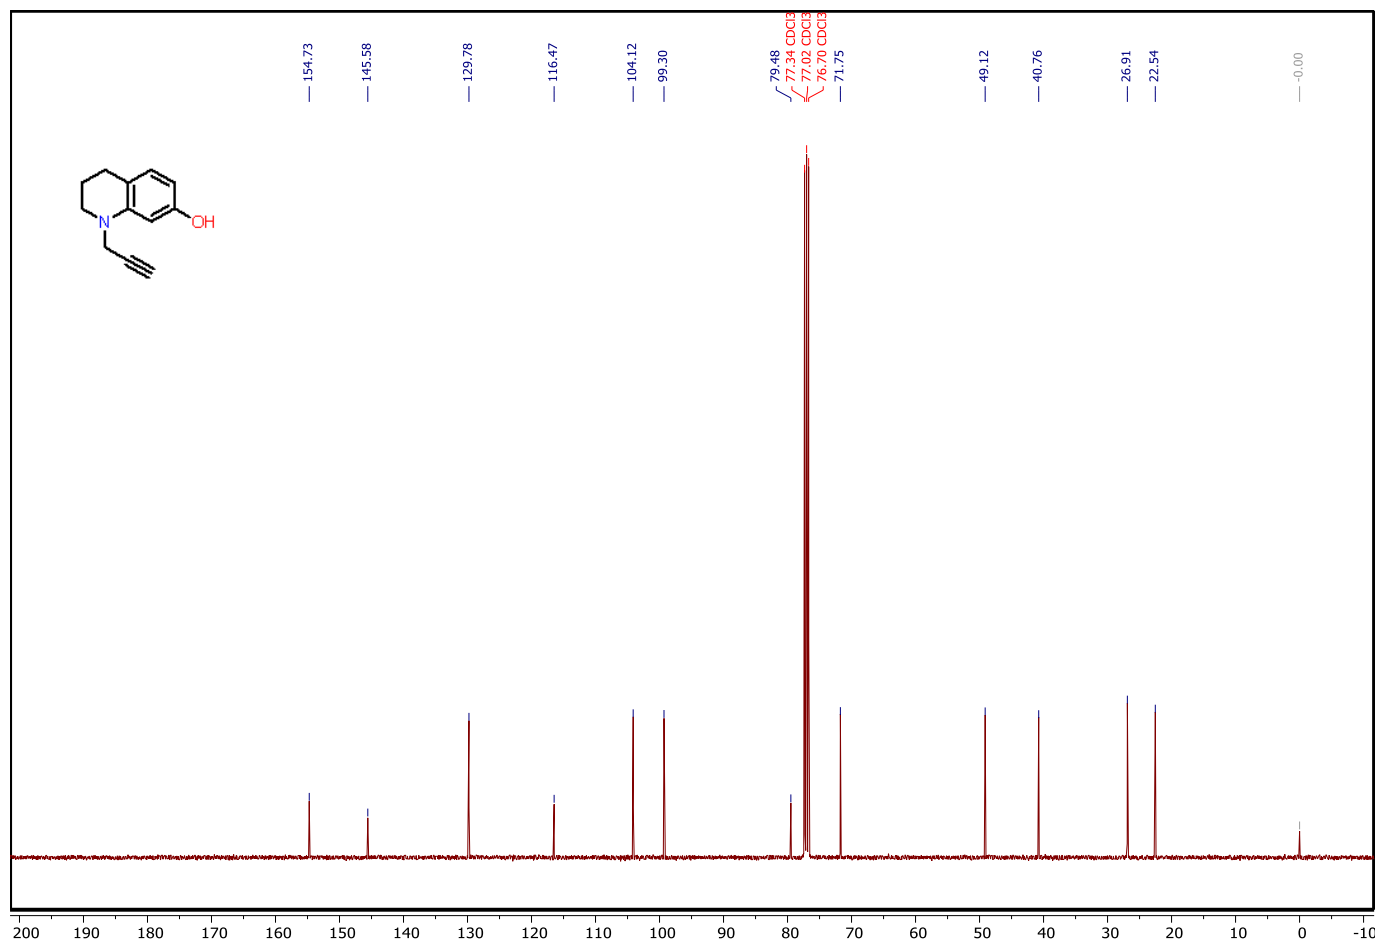

**Fig. S42.**  $^{13}\text{C}$  spectrum of **10**.

$^{13}\text{C}$  NMR (101 MHz,  $\text{CDCl}_3$ )  $\delta$  154.73, 145.58, 129.78, 116.47, 104.12, 99.30, 79.48, 71.75, 49.12, 40.76, 26.91, 22.54.

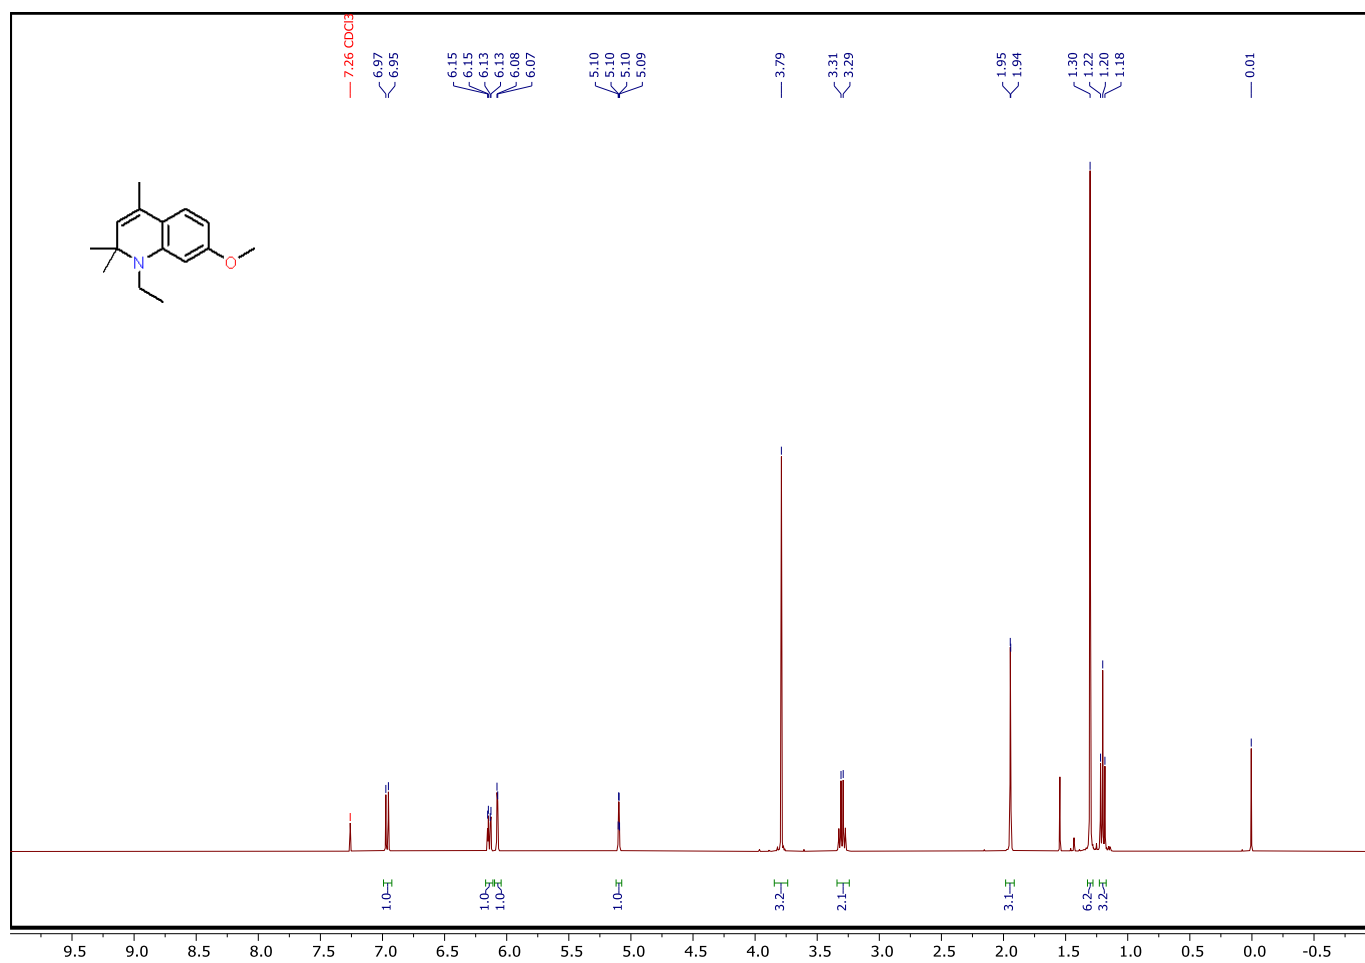

**Fig. S39.** <sup>1</sup>H spectrum of **11**.

<sup>1</sup>H NMR (400 MHz, CDCl<sub>3</sub>) δ 6.96 (d, *J* = 8.3 Hz, 1H), 6.14 (dd, *J* = 8.3, 2.4 Hz, 1H), 6.08 (d, *J* = 2.4 Hz, 1H), 5.10 (q, *J* = 1.4 Hz, 1H), 3.79 (s, 3H), 3.30 (d, *J* = 7.1 Hz, 2H), 1.94 (d, *J* = 1.4 Hz, 3H), 1.30 (s, 6H), 1.20 (t, *J* = 7.0 Hz, 3H).

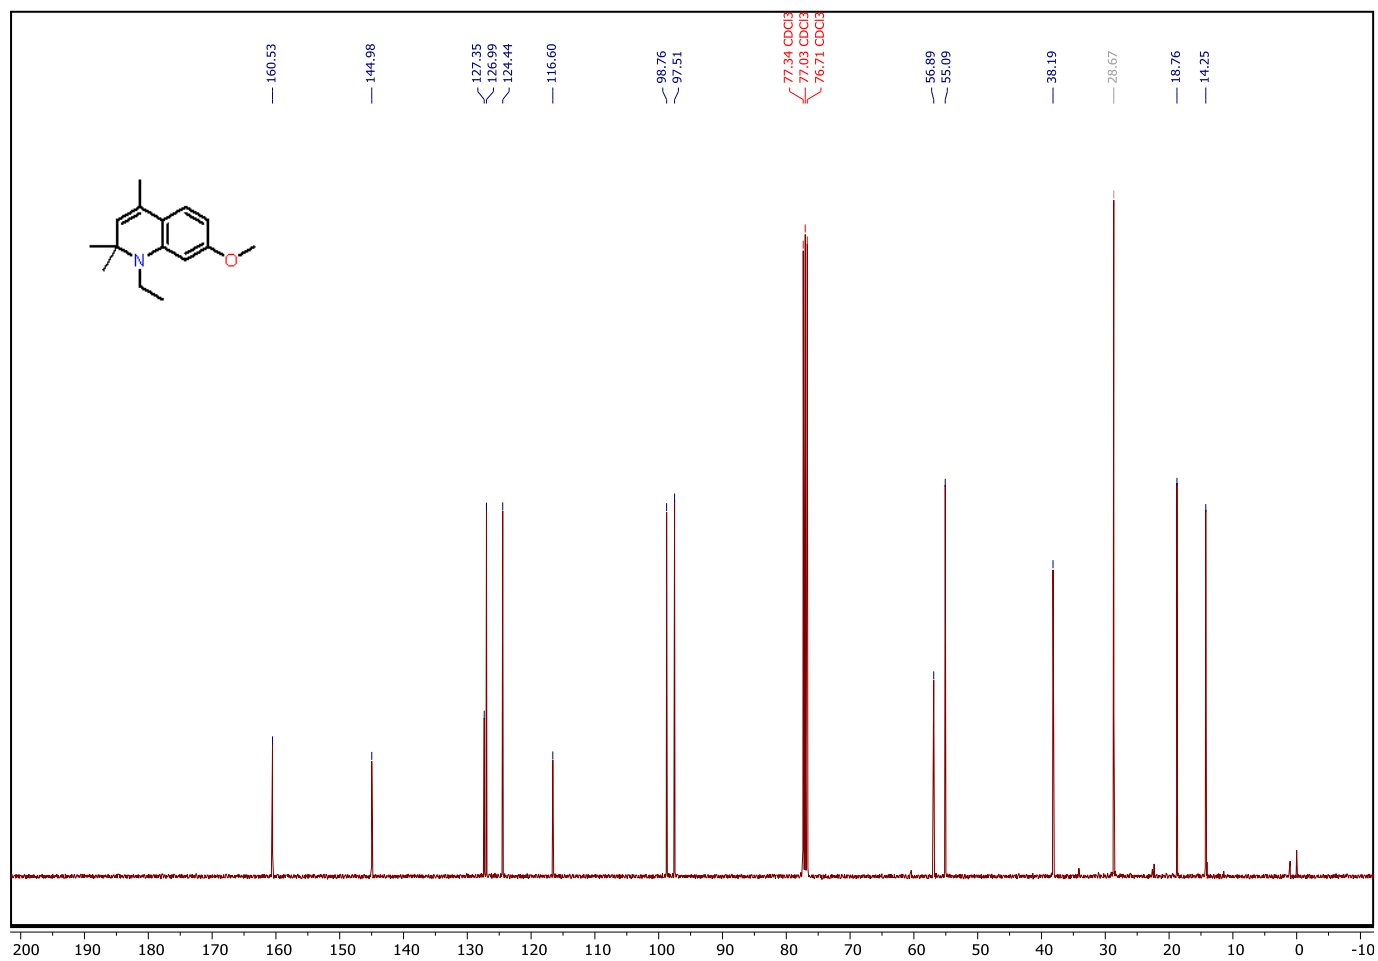

**Fig. S40.**  $^{13}\text{C}$  spectrum of **11**.

$^{13}\text{C}$  NMR (101 MHz,  $\text{CDCl}_3$ )  $\delta$  160.53, 144.98, 127.35, 126.99, 124.44, 116.60, 98.76, 97.51, 56.89, 55.09, 38.19, 18.76, 14.25.

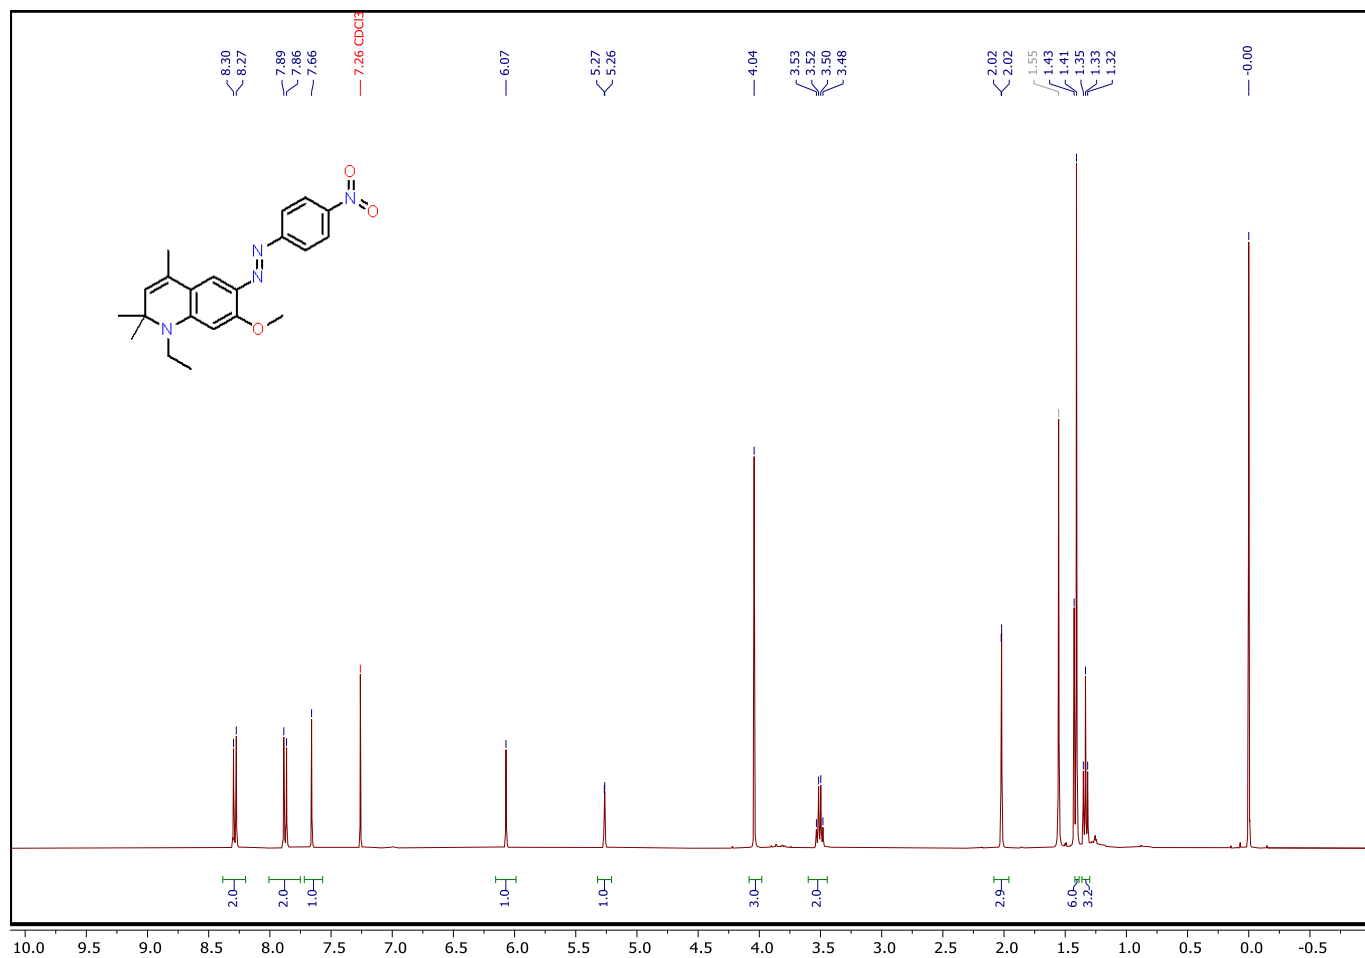

**Fig. S43.** <sup>1</sup>H spectrum of **12**.

<sup>1</sup>H NMR (400 MHz, CDCl<sub>3</sub>) δ 8.29 (d, J = 9.0 Hz, 2H), 7.87 (d, J = 9.0 Hz, 2H), 7.66 (s, 1H), 6.07 (s, 1H), 5.27 (d, J = 1.5 Hz, 1H), 4.04 (s, 3H), 3.51 (q, J = 7.1 Hz, 2H), 2.02 (d, J = 1.4 Hz, 3H), 1.41 (s, 6H), 1.33 (t, J = 7.0 Hz, 3H).

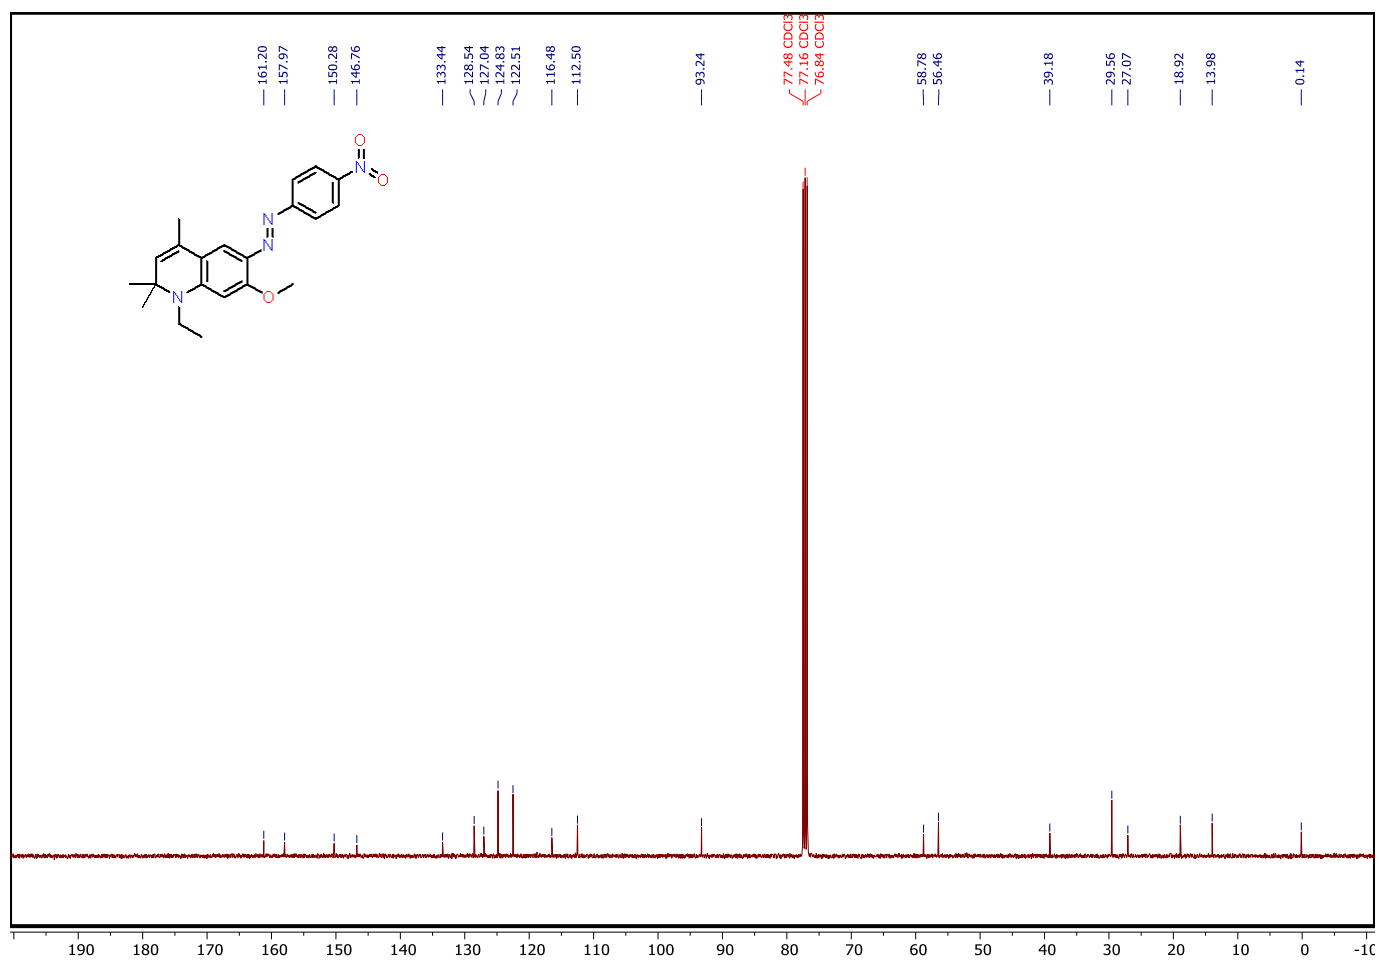

**Fig. S44.**  $^{13}\text{C}$  spectrum of **13**.

$^{13}\text{C}$  NMR (101 MHz,  $\text{CDCl}_3$ )  $\delta$  161.20, 157.97, 150.28, 146.76, 133.44, 128.54, 127.04, 124.83, 122.51, 116.48, 112.50, 93.24, 77.48, 77.16, 76.84, 58.78, 56.46, 39.18, 29.56, 27.07, 18.92, 13.98, 0.14.

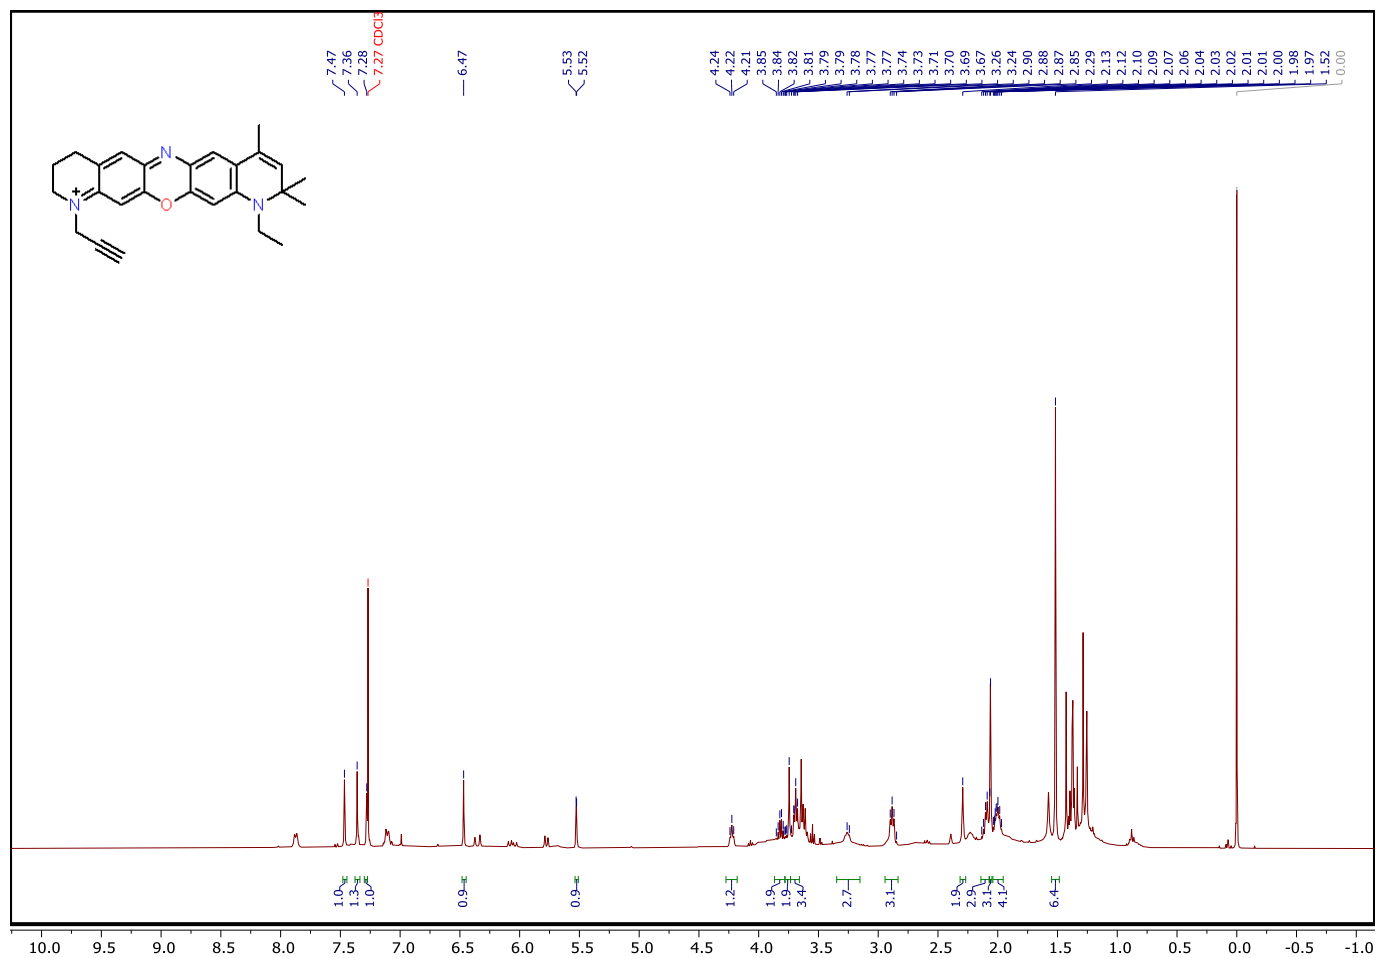

**Fig. S45.** <sup>1</sup>H spectrum of **14**.

<sup>1</sup>H NMR (400 MHz, CDCl<sub>3</sub>) δ 7.47 (s, 1H), 7.36 (s, 1H), 7.28 (s, 1H), 6.47 (s, 1H), 5.53 (d, J = 1.5 Hz, 1H), 4.27 – 4.18 (m, 1H), 3.82 (q, J = 5.7 Hz, 2H), 3.74 (s, 2H), 3.73 – 3.66 (m, 3H), 3.25 (d, J = 7.5 Hz, 3H), 2.88 (t, J = 6.3 Hz, 3H), 2.29 (s, 2H), 2.14 – 2.07 (m, 3H), 2.06 (s, 3H), 2.04 – 1.95 (m, 4H), 1.52 (s, 6H).
